# Supplementary material for: Effectiveness of involving the private medical sector in the National TB Control Programme in Bangladesh: evidence from mixed methods
Source: PubMed Central journal article supplement — BMJ Open. 2012 Dec 18;2(6):e001534. doi: 10.1136/bmjopen-2012-001534 (PMC3532984; doi:10.1136/bmjopen-2012-001534), 2012-12-18
Supplement: bmjopen-2012-001534.draft_revisions.pdf [file bmjopen-2012-001534.draft_revisions.pdf]

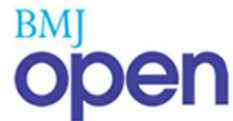

**Involving the Private Medical Sector in TB Control in Bangladesh: a mixed method study**

|                                 |                                                                                                                                                                                                                                                                                                                                                        |
|---------------------------------|--------------------------------------------------------------------------------------------------------------------------------------------------------------------------------------------------------------------------------------------------------------------------------------------------------------------------------------------------------|
| Journal:                        | <i>BMJ Open</i>                                                                                                                                                                                                                                                                                                                                        |
| Manuscript ID:                  | bmjopen-2012-001534                                                                                                                                                                                                                                                                                                                                    |
| Article Type:                   | Research                                                                                                                                                                                                                                                                                                                                               |
| Date Submitted by the Author:   | 26-May-2012                                                                                                                                                                                                                                                                                                                                            |
| Complete List of Authors:       | Zafar Ullah, Abu; University of Leeds, Leeds Institute of Health Sciences Huque, Rumana; Dhaka University, Economics Husain, Ashaque; National TB Control Programme, Bangladesh, Akter, Salma; Society for Empowerment, Education and Development (SEED), Islam, Akramul; BRAC, Newell, James; University of Leeds, Leeds Institute of Health Sciences |
| <b>Primary Subject Heading</b>: | Public health                                                                                                                                                                                                                                                                                                                                          |
| Secondary Subject Heading:      | Health policy, Health services research, Infectious diseases, Evidence based practice                                                                                                                                                                                                                                                                  |
| Keywords:                       | Public health < INFECTIOUS DISEASES, Tuberculosis < INFECTIOUS DISEASES, PUBLIC HEALTH, Health policy < HEALTH SERVICES ADMINISTRATION & MANAGEMENT                                                                                                                                                                                                    |
|                                 |                                                                                                                                                                                                                                                                                                                                                        |

SCHOLARONE™  
Manuscripts

Only

## Involving the Private Medical Sector in TB Control in Bangladesh: a mixed method study

Authors: Zafar Ullah A N<sup>1</sup>; Huque R<sup>2</sup>; Husain A<sup>3</sup>; Akter S<sup>4</sup>; Islam A<sup>5</sup>; Newell J N<sup>1</sup>

### Abstract

**Objectives:** In Bangladesh, private health care is common and popular, regardless of income or area of residence, making the private sector an important player in health service provision. Although the private sector offers a good range of health services, TB care in the private sector is poor. We conducted research in Dhaka between 2004 and 2008 to develop and evaluate a Public-Private Partnership (PPP) model to involve Private Medical Practitioners (PMPs) within the NTP's TB control activities. Since 2008, this PPP model has been scaled up in two other big cities – Chittagong and Sylhet. This paper reports the results of this development, evaluation and scale up.

**Design:** Mixed method, observational study design. We used NTP service statistics to compare the TB control outcomes between intervention and control areas. To capture detailed insights of PMPs and TB managers about the process and outcomes of the study, we conducted in-depth interviews, focus group discussions, and workshops.

**Setting:** Urban setting – piloted in four areas in Dhaka city; later scaled up in other areas of Dhaka and in two major cities.

**Findings:** The partnership with PMPs yielded significantly increased case finding of sputum smear positive TB cases. Between 2004 and 2010, 703 participating PMPs referred 3,959 sputum smear positive TB cases to the designated DOTS centres – contributing about 36% of all TB cases in the project areas. There was a steady increase in case notification rates in the project areas following implementation of the partnership.

**Conclusions:** The PPP model was highly effective in improving access and quality of TB care in urban settings.

---

<sup>1</sup> Nuffield Centre for International Health and Development, Leeds Institute of Health Sciences, University of Leeds, United Kingdom. Correspondence should be sent to Dr. Zafar Ullah at this address ([hss1anuz@leeds.ac.uk](mailto:hss1anuz@leeds.ac.uk))

<sup>2</sup> Department of Economics, University of Dhaka, Bangladesh

<sup>3</sup> National Tuberculosis Control Programme, Bangladesh

<sup>4</sup> Society for Empowerment, Education and Development (SEED), Bangladesh

<sup>5</sup> Associate Director, BRAC Health Programme, Bangladesh

## Introduction

Despite the availability of effective treatment, our ability to control tuberculosis (TB) remains uncertain. Current estimates suggest that globally every year there are over 9 million new TB cases, and nearly 2 million people die from TB: 98% of these cases and deaths occur in developing countries.<sup>1</sup> The World Health Organisation (WHO) predicts that 36 million people will die of TB between 2002 and 2020 if control measures do not improve.<sup>2-4</sup> Bangladesh is among the top ten high TB burden countries, with estimated prevalence and incidence of all forms of TB of 426 and 225 per 100,000 population respectively.<sup>1</sup> To reduce this burden, the Bangladesh National TB Control Programme (NTP) has adopted the DOTS strategy, delivered primarily through government-run health facilities.<sup>5</sup> However, major obstacles to implementation remains primarily due to insufficient infrastructure and appropriately trained health personnel.<sup>6,7</sup> These limitations mean many people with the (rather non-specific) signs and symptoms of TB must travel considerable distances to obtain TB care, have lengthy waits to be seen when they arrive, and may not be dealt with appropriately. Health facility opening times that are inconvenient for working people also limit accessibility and acceptability of Direct Observation of Treatment (DOT), a central component of DOTS. Furthermore, there is considerable stigma associated with TB, both in its own right and because of its association with HIV/AIDS. These factors combine to limit patients' desire and ability to seek early diagnosis and treatment from public services. Consequently, large numbers of people with chest symptoms initially seek care from private health care providers.

Private healthcare is common in Bangladesh and popular amongst all, regardless of income or location. Private health care providers are found in abundance, primarily in urban areas.<sup>8-10</sup> Although the private sector offers a range of good quality health services, as in many other countries, the care they provide for TB is poor with over-reliance on radiology for diagnosis, use of inappropriate treatment regimens, and poor case holding, leading to incomplete treatment and potentially to MDR-TB.<sup>11-14</sup> Moreover, non-existent linkages with the public sector mean TB cases managed by private sector providers are neither recorded nor reported, so that routine cohort reporting is impossible, and outcomes are not consolidated into national data.

In this context, we conducted research between 2004 and 2008 to develop and evaluate a Public-Private Partnership (PPP) model to involve Private Medical Practitioners (PMPs) in the NTP's TB control activities. Since 2008, this PPP model has been scaled up in two other big cities, Chittagong and Sylhet, in addition to continued implementation in Dhaka City. This paper reports the outcomes from this development, evaluation and scale up.

## Methods

This operational research study was set within an existing NTP-NGO collaboration framework, enabling participation of SEED and three selected NGOs – BRAC, Progoti Samaj Kallyan Protisthan (PSKP) and Population Services Training Centre (PSTC). The NTP supported the organisation and management of the research activities. A local Project Coordinator coordinated the project activities.

We developed the PPP model in three phases:

- Preparation phase
  - Formation of a Technical Working Group Committee (TWGC)
  - Collection of pre-intervention baseline data
  - Identification of tasks/service components within the partnership, based on partners' diverse strengths.
- Intervention phase
  - Strengthening DOTS centres to provide the PPP service components
  - Orientation and training of PMPs on NTP guidelines/protocols
  - Adaptation of TB forms and registers to incorporate PPP components
  - Development of diagnostic, referral and treatment protocols and linkages
  - Development and organisation of ACSM initiatives involving all stakeholders
  - Monitoring and supervision of the partnership activities
  - Evaluation of pilot phase.
- Scale up phase
  - Identification and orientation of new partners
  - Scale up.

Four areas of Dhaka City, with population nearly one million, were selected purposively for the study, where the NTP and NGOs were undertaking joint TB control activities; the selected partner NGOs provided TB service delivery (diagnosis and treatment); and where PMPs were major providers of health services.

To evaluate the PPP, we compared TB outcomes in the intervention and control areas using service statistics from the NTP and the five NGO DOTS centres involved. We also collected additional baseline data from the selected PMPs (see Zafar Ullah *et al* 2010 for details), and used in-depth interviews, focus group discussions (FGDs) and workshops to capture PMPs' and TB managers' insights into the process and outcomes of the study (Table 1).

Table 1: evaluation methods, participants, tools and focus

| Phase       | Method (n)                 | Participants (n)                                         | Tools                             | Focus                   |
|-------------|----------------------------|----------------------------------------------------------|-----------------------------------|-------------------------|
| Preparation | • Survey (1)               | • PMPs (60)                                              | • Semi-structured questionnaire   | • Process               |
|             | • In-depth interviews (42) | • NTP managers (12)<br>• NGO managers (6)<br>• PMPs (24) | • Semi-structured questionnaire   | • Process<br>• Outcomes |
|             | • FGDs (4)                 | • PMPs (24)                                              | • FGD guidelines                  | • Process               |
| Evaluation  | • Workshops (2)            | • PMPs (60: 30 per workshop)                             | • Agenda<br>• Workshop guidelines | • Process<br>• Outcomes |
|             | • Follow-up interviews     | • PMPs (12)                                              | • Semi-structured questionnaire   | • Process<br>• Outcomes |

Analysis of quantitative data was primarily by tabulations and graphs, and of qualitative data by thematic analysis.

Ethics approval was obtained from the University of Leeds and the Directorate General of Health Services, Ministry of Health and Family Affairs, Bangladesh.

Zafar Ullah

## Findings

### Pilot Implementation (2004-2008)

At inception in 2004 the PPP included 97 PMPs but by the end of 2009 this had risen to 703. There was continuous enrolment of PMPs: although numbers fluctuated due to retirements and relocation, no PMPs chose to leave the PPP for other reasons. The male:female ratio was 6:1, reflecting the ratio amongst urban private health service providers.

All 703 PMPs were trained to provide quality TB care. As PMPs made it clear they were unwilling to set aside more than two days for training, we tailor-made a two-day training module (based on a training needs assessment) that included technical aspects of TB care, operational aspects of the PPP, and TB record-keeping.

We used a participatory approach involving all stakeholders including PMPs to develop many tools and forms. These were field-tested and reviewed before use. We also used a participatory approach to develop Advocacy, Communication and Social Mobilisation (ACSM) materials, which were made context-specific using baseline survey data. These advocacy activities had a major role in influencing policy makers to endorse the PPP model for country-wide scale-up.

Within the project period (2004-2008), a total of 3,585 sputum smear positive (SS+) TB patients were registered in the five DOTS centres in the project areas; of these 647 were referred by PMPs. Numbers referred rose progressively over the period (Table 2).

*Table 2: SS+ TB cases registered in the PPP areas*

|                                     | <b>2004</b> | <b>2005</b> | <b>2006</b> | <b>2007</b> | <b>2008</b> | <b>Total</b> |
|-------------------------------------|-------------|-------------|-------------|-------------|-------------|--------------|
| Total SS+ TB cases                  | 533         | 673         | 800         | 830         | 749         | <b>3585</b>  |
| Total SS+ TB cases referred by PMPs | 11          | 54          | 143         | 164         | 275         | <b>647</b>   |
| PMPs' contribution (%)              | 2           | 8           | 18          | 20          | 37          | <b>18</b>    |

The case notification rate for new SS+ TB cases in the study areas increased steadily over the project period, and was consistently higher than the national average. By 2008 the rate in the study areas was 94/100,000 while the national rate was 73/100,000 (Figure 1). The study rate was also consistently higher than that in Dhaka Metropolitan City, which encloses the study sites (Figure 1).

Figure 1: Case notification rates of new SS+ TB cases in Dhaka Metropolitan City\* and the PPP project areas

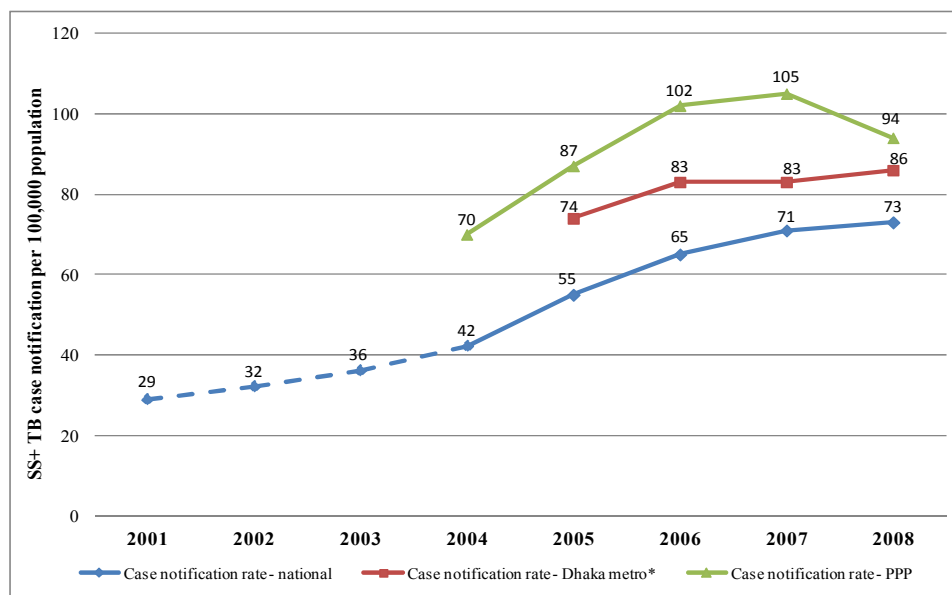

\*Data for Dhaka Metropolitan City available only from 2005, when the NTP started reporting for Metropolitan areas.

Another noticeable impact of the PPP was a large increase in numbers of cases of extra-pulmonary TB registered over time (Figure 2).

Figure 2: Numbers of extra-pulmonary TB cases registered in the PPP DOTS Centres

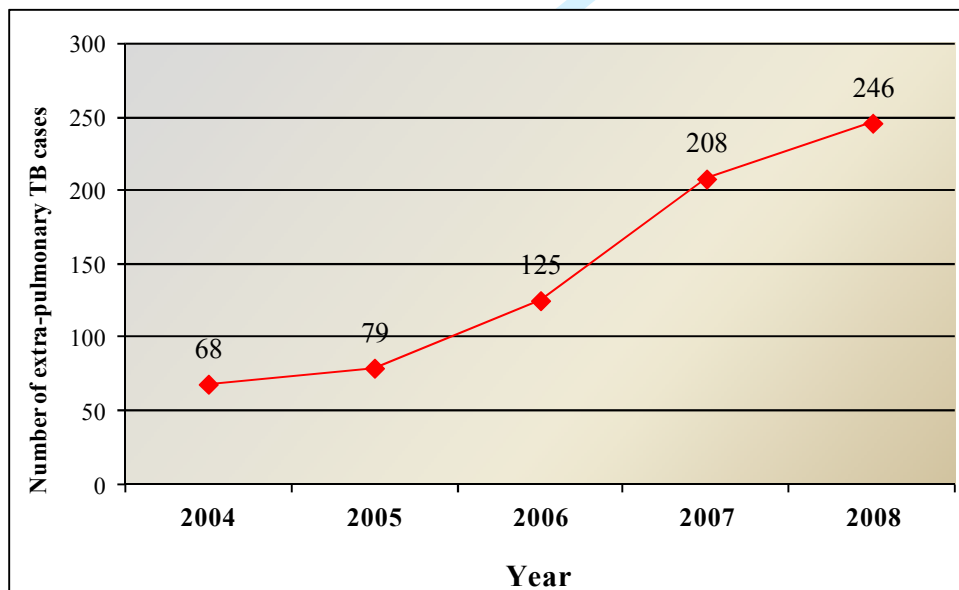

PMPs made a significant contribution to the numbers of TB suspects examined in the designated labs in the four PPP areas: in total 2,756 of the 24,678 TB suspects examined were referred by PMPs, with a steady rise over the study period (Figure 3).

Figure 3: Numbers of TB suspects receiving sputum microscopy in PPP areas

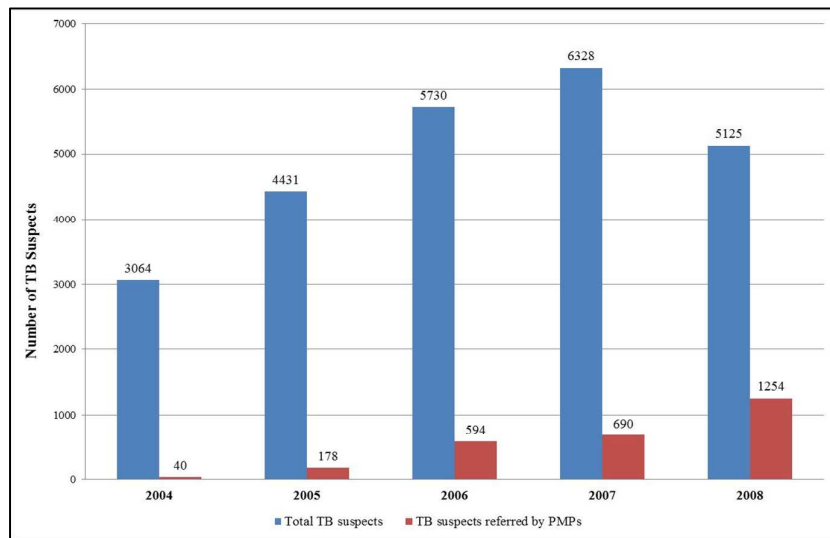

**Scaling up and GRIPP**

Based on the PPP pilot results, the NTP started implementing the PPP model in other cities – Chittagong (from 2007), Sylhet (2008), and other areas of Dhaka (2009) – covering more than 15 million people. In Chittagong, five NGO partners collaborated with the NTP to support the PPP; in Sylhet, BRAC was the only NGO service provider, but two medical college hospitals were also involved. In the scale-up areas, PMPs have made a substantial contribution to the NTP’s effort to control TB in Bangladesh (Figure 4 and Table 3).

Figure 4: SS+TB patients registered in PPP scale up areas and PMP’s contribution, 2007-2010

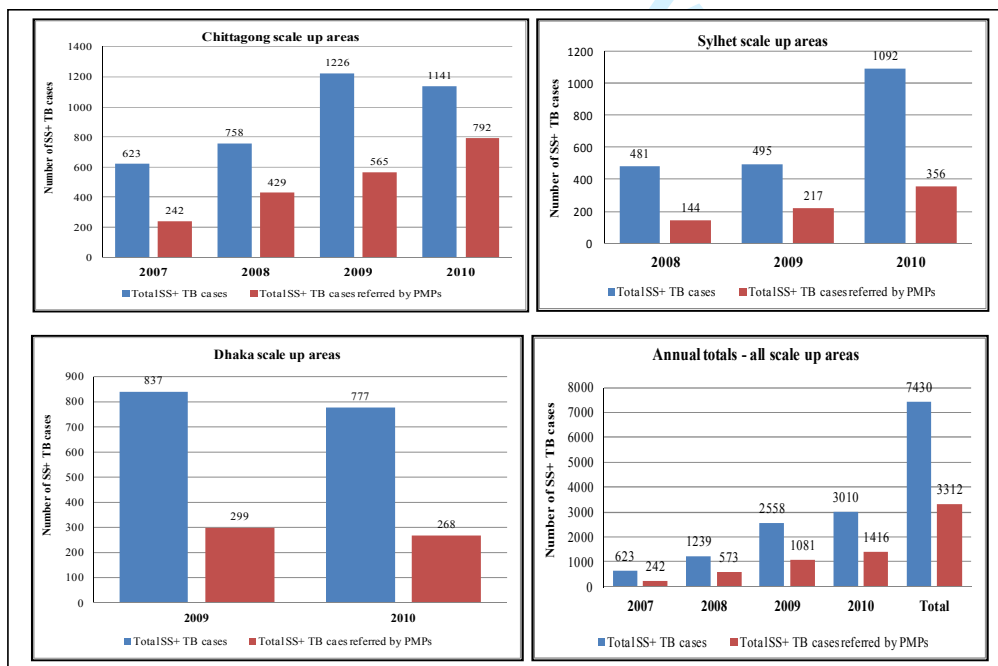

### ***Overall impact of the PPP on TB Control***

The involvement of PMPs substantially increased case finding of SS+ TB cases, a key TB control indicator. The partnership yielded significant contribution in identifying SS+ TB cases – from the inception of the PPP in 2004 until 2010, 703 participating PMPs referred almost 19,000 TB suspects and 3,959 SS+ TB cases to the designated DOTS centres (Figure 5). Overall, almost 36% of all SS+ TB cases were attributable to involvement of the private sector providers (Table 3).

*Figure 5: Overall PMP contribution to identifying TB suspects in all PPP areas, 2004-2010 (including scale up)*

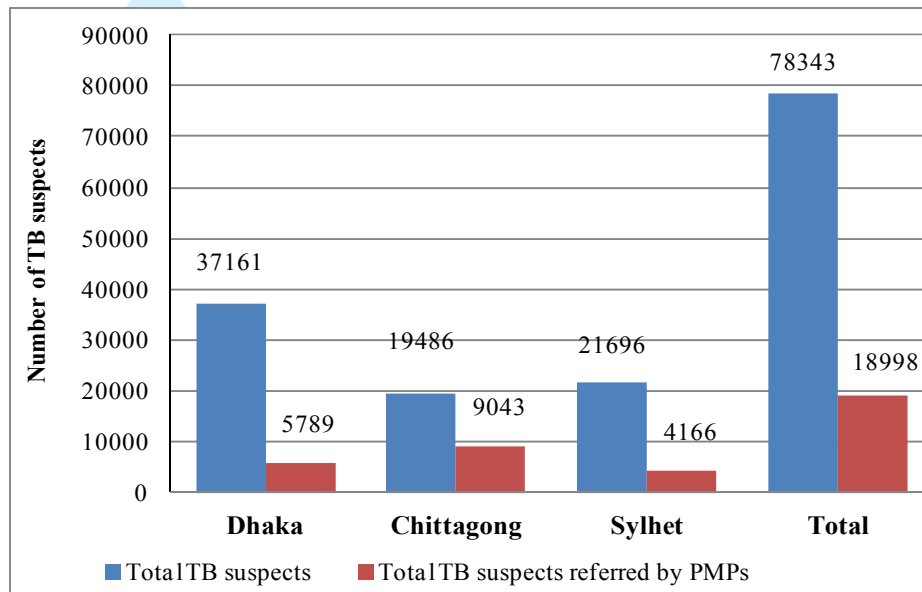

*Table 3: Total SS+TB patients in all PPP areas and PMP's contribution, 2004-2010*

|                                     | Dhaka | Chittagong | Sylhet | Total        |
|-------------------------------------|-------|------------|--------|--------------|
| Total SS+ TB cases in the PPP areas | 5199  | 3748       | 2068   | <b>11015</b> |
| Total SS+ TB cases referred by PMPs | 1214  | 2028       | 717    | <b>3959</b>  |
| PMPs' contribution %                | 23    | 54         | 35     | <b>36</b>    |

The qualitative evaluation revealed that the participatory approach of planning and designing the PPP including involvement of all stakeholders in the process of selecting service components, selecting partners, and monitoring of the PPP played a crucial part in securing commitment and ownership from all parties involved. Virtually all PMPs interviewed (96%) mentioned having a positive experience in regard to the monitoring and support mechanism of the project, which was key to the success of the project implementation, and paved the way for scale-up. Specifically, they valued the monthly field visit by the project field staff. In reply to the question: “Do you own this project?” a popular PMP spontaneously replied “Oh, yes. No doubt about it”. He went on to say “I have been consulted throughout the planning process of the project, and later we have jointly implemented it. So, this is our project. I am part of it”.

Zafar Ullah



1  
2  
3  
4 The quarterly review meetings were organised in rotation by the NTP and the partner NGOs  
5 either in the NTP's conference room or in one of the NGO's working locations. When asked  
6 about these arrangements, both the NTP and NGOs expressed their satisfaction and expressed  
7 their commitment to maintaining this practice in future collaborations.  
8

9  
10 All PMPs interviewed (n=24) said they had no problems using the referral and other forms.  
11 *"The [TB related] registers and referral forms are quite simple and user-friendly, and easy*  
12 *to maintain"* said a busy practitioner. The NTP managers said they were amazed by the fact  
13 that most PMPs were keeping records. The PMPs also liked the system of referral back to the  
14 referring practitioners, which preserved their commercial interests. However, a few PMPs  
15 were unhappy that they felt they did not get sufficient feedback about the patients they had  
16 referred, even though feedback was regularly given to PMPs through monthly field visits and  
17 during quarterly review meetings.  
18

19  
20 Another important finding was that the public, NGO and private sector providers showed  
21 strong commitment and willingness to work together to achieve the common goal of TB  
22 control, although PMPs were initially sceptical about the motive of the public sector  
23 regarding this partnership, and the public sector and NGOs were initially doubtful whether  
24 PMPs would sacrifice their time to participate in such partnerships.  
25

26  
27 The evaluation revealed major challenges in managing the PPP. It was difficult to bring such  
28 a heterogeneous group under one umbrella, especially in the early stages of the partnership  
29 process. In the absence of a regulatory mechanism, the PPP was primarily based on good  
30 relationships and dialogue. Both NTP and NGO respondents stated that they were sometimes  
31 overburdened with the extra work needed to implement the partnership activities. The NTP  
32 was hit harder than the partner NGOs, because there was a shortage of staff within the NTP  
33 management. Other key challenges encountered during implementation were to maintain the  
34 progress of the partnership, as it evolved, and to ensure joint ownership of decisions and  
35 collective responsibility for the direction and activities of the partnership. One senior PMP  
36 said *"Initially I thought this partnership would fail because I had serious reservations about*  
37 *negative attitudes of government officials. They [government officials] don't know how to*  
38 *give respect to anybody other than their bosses. But after getting the chance to work with the*  
39 *NTP, I have now changed my mind. I have found the government officials now behave much*  
40 *better than they used to do in the past"*.  
41  
42

### 43 **Discussion**

44  
45 The PPP model was highly effective in improving access to and quality of TB care in urban  
46 settings, as evidenced by a steady increase in case notification since implementation of the  
47 partnership. In PPP areas the case notification rate increased from 36% of estimated cases  
48 (pre-implementation) in 2003 to 94% in 2008, exceeding internationally agreed targets, and  
49 consistently maintained much higher rates than the national average.  
50

51  
52 Systematic implementation of the PPP led to greater and effective involvement of PMPs,  
53 resulting not only in increased access to quality TB care but also reduced harmful care by  
54 PMPs with the potential for development of chronic or MDR-TB.  
55

56  
57 The lessons learned from this partnership formed the basis of the National PPM (Public-  
58 Private Mix) guidelines. National recording and reporting forms and registers were revised to  
59

60  
Zafar Ullah

1  
2  
3 incorporate PPP elements, considerably improving the quality of TB reporting as well as  
4 strengthening the health information system. The referral mechanism allowed referral back to  
5 the PMPs for case holding if they wished, giving PMPs confidence that they would not lose  
6 their patients, which greatly increased their motivation to remain in the partnership.  
7

8  
9 The public, NGO and private sector providers showed strong commitment and willingness to  
10 work together to achieve the common goal of TB control, although PMPs were initially  
11 sceptical about the motive of the public sector regarding this partnership. Moreover, the  
12 public sector and NGOs were doubtful whether PMPs would sacrifice their time to participate  
13 in such partnerships. As observed elsewhere,<sup>15</sup> PMPs expressed a lack of confidence in the  
14 quality of public sector TB services, especially of diagnosis using sputum microscopy and the  
15 NTP-recommended treatment regimen. This study addressed these issues through joint  
16 development and monitoring of partnership activities and strong advocacy and  
17 communication campaigns. In addition to disseminating information for raising awareness,  
18 technical training on DOTS and the NTP guidelines was conducted to improve PMPs'  
19 knowledge, attitudes and practices in TB care provision. These activities helped the PMPs to  
20 gain confidence and trust in the public sector services, which in turn facilitated the  
21 development of a close relationship with the NTP and NGO partners. These findings are  
22 consistent with the outcomes of other much smaller operational research projects  
23 implemented elsewhere.<sup>14-20</sup>  
24  
25

26 PMPs initially expected financial support from the NTP as a partnership component. This  
27 expectation was discussed with all stakeholders and it was agreed that any financial incentive  
28 would jeopardise the partnership and could prove unsustainable in the long run. Public sector  
29 managers had thought these decisions would deter PMPs from becoming involved, but events  
30 proved otherwise.  
31  
32

33 The key challenges encountered during implementation were to maintain progress as the  
34 partnership evolved, and to ensure joint ownership of decisions and collective responsibility  
35 for the direction and activities of the partnership. The NTP's and other partners' continuing,  
36 visible and joint commitment and nurturing of an atmosphere where all stakeholders could  
37 feel involved in the partnership were critical to overcoming these challenges.  
38  
39

40 The study demonstrated that TB control outcomes could be achieved by combining the  
41 diverse strengths and advantages of the public and private sectors, NGOs and a group of  
42 selected PMPs. High rates of case detection and treatment success were attained without  
43 involving all private practitioners in the area, thus making the PPP technically attractive to  
44 national programmes in terms of feasibility of implementation and wider scale up.  
45

#### 46 **Acknowledgements**

47 We thank the patients, PMPs, and NGOs involved in this study, and the Bangladesh NTP for  
48 permission to carry out the study.  
49

50  
51 **Funding:** This study was funded by the Department for International Development (DFID)  
52 of the United Kingdom through the COMDIS research programme consortium; however,  
53 DFID can accept no responsibility for any information provided or views expressed.  
54

55 **Conflicts of interest:** none declared.  
56  
57  
58  
59

60 *Zafar Ullah*

1  
2  
3 **Authors contributions:** ZU conceived and designed the study, led the data collection and  
4 analysis, and preparation of the manuscript; RH participated in the data analysis and in the  
5 preparation of the manuscript; AH participated in data collection and analysis; SA  
6 coordinated the study implementation and data collection; AI participated in data collection;  
7 JNN participated in the design of the study, advised on data collection and analysis and  
8 participated in the preparation of the manuscript.  
9

10  
11  
12  
13  
14  
15  
16  
17  
18  
19  
20  
21  
22  
23  
24  
25  
26  
27  
28  
29  
30  
31  
32  
33  
34  
35  
36  
37  
38  
39  
40  
41  
42  
43  
44  
45  
46  
47  
48  
49  
50  
51  
52  
53  
54  
55  
56  
57  
58  
59  
60

For peer review only

## References

1. World Health Organisation. *Global Tuberculosis Control: World Health Organisation Report 2010*; Geneva: World Health Organisation.
2. World Health Organisation. *Tuberculosis Factsheet 2002*; Factsheet Number 104, Revised August 2002; Geneva: World Health Organisation.
3. Grange JM, Zumla A. The global emergency of tuberculosis: What is the cause? *J R Soc Health*, 2002; **122**: 78–81.
4. Benatar S, Brock G. *Global Health and Global Health Ethics*; Cambridge, United Kingdom: Cambridge University Press, 2011
5. Malmborg R, Mann GH, Thomson R, Squire SB. Can public-private collaboration promote tuberculosis case detection among the poor and vulnerable? *Bull World Health Organ*, 2006, **84**: 752–8.
6. World Health Organisation. *Tuberculosis and Health Sector Reforms in Bangladesh – A Concept Paper*, 2004. New Delhi: World Health Organisation, Regional Office for South-East Asia.
7. The National Tuberculosis Control Programme (NTP). *Annual report 2007* Dhaka: Government of Bangladesh.
8. UNICEF. *Public-private partnership in the social sector- part two: country experiences, 1999*: 219–291; Dhaka: UNICEF Bangladesh.
9. Zafar Ullah AN, Lubben M, Newell JN. A model for effective involvement of private medical practitioners in TB care. *International Journal of Health Planning and Management*, 2004, **19 (3)**: 227–245.
10. World Bank. *Comparative Advantages of Public and Private Health Care Providers in Bangladesh; Bangladesh Development Series Paper No. 4, 2005*; South Asia Human Development Unit, Dhaka: The World Bank Office.
11. Zafar Ullah AN, Huque R, Begum V, Newell JN, Gerein N. Public-private partnership for TB control in Bangladesh: role of private medical practitioners in the management of TB patients. *World Medical & Health Policy*, 2010; **2 (1)**, Article 13.
12. Uplekar MW, Juvekar SK, Monarkar S, Rangan S, Nunn P. Tuberculosis patients and practitioners in private clinics in India, *Int J Tuberc Lung Dis*, 1998; **2**: 324–9.
13. World Health Organisation. *Involving private medical practitioners in TB and STI control, 2001*. New Delhi: World Health Organisation.
14. Newell JN, Pande SB, Baral SC, Bam DS, Malla P. Control of Tuberculosis in an urban setting in Nepal: public-private partnership. *Bull World Health Organ*, 2004; **82**: 92–98.
15. Newell JN, Pande SB, Baral SC, Bam DS, Malla P. Leadership, management and technical lessons learnt from a successful public-private partnership for TB control in Nepal, *Int J Tuberc Lung Dis*, 2005; **9(9)**:1013–1017.
16. Porter JD, Ogden JA, Rao PV, Rao VP, Rajesh D, Buskade RA, Soutar D. Introducing operations research into management and policy practices of a non-governmental organization (NGO): a partnership between an Indian leprosy NGO and an international academic institution. *Health Policy Plan*; 2004; **19(2)**: 80–87.
17. Rangan S. The Public-Private Mix in India's Revised National Tuberculosis Control Programme: An Update, *J Indian Med Assoc.* 2003;**101(3)**: 161–163.
18. Rangan S, Rasalpurkar SB, Morankar SN, Joshi AN, Porter JDH. Tuberculosis control in rural India: lessons from public- private collaboration, *Int J Tuberc Lung Dis*, 2004; **8**: 552.

19. Dewan P, Lal SS, Lonroth K, Wares F, Uplekar M, Sahu S, Granich R, Chauhan LS. Improving Tuberculosis Control through Public-Private Collaboration in India: Literature Review; *BMJ* 2006; **332**: 574–578.
20. Dreesch N, Nyoni J, Mokopakgosi O, Seipone K, Kalilani JA, Kaluwa O, Musowe V. Public-private options for expanding access to human resources for HIV/AIDS in Botswana; *Human Resources for Health*, 2007;**5**: 25.

For peer review only

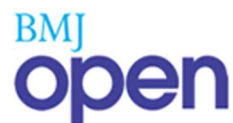

**Involving the Private Medical Sector in TB Control in Bangladesh: a mixed method study**

|                                 |                                                                                                                                                                                                                                                                                                                                                                         |
|---------------------------------|-------------------------------------------------------------------------------------------------------------------------------------------------------------------------------------------------------------------------------------------------------------------------------------------------------------------------------------------------------------------------|
| Journal:                        | <i>BMJ Open</i>                                                                                                                                                                                                                                                                                                                                                         |
| Manuscript ID:                  | bmjopen-2012-001534.R1                                                                                                                                                                                                                                                                                                                                                  |
| Article Type:                   | Research                                                                                                                                                                                                                                                                                                                                                                |
| Date Submitted by the Author:   | 21-Sep-2012                                                                                                                                                                                                                                                                                                                                                             |
| Complete List of Authors:       | Zafar Ullah, Abu; University of Leeds, Leeds Institute of Health Sciences<br>Huque, Rumana; Dhaka University, Economics<br>Husain, Ashaque; National TB Control Programme, Bangladesh,<br>Aker, Salma; Society for Empowerment, Education and Development<br>(SEED),<br>Islam, Akramul; BRAC,<br>Newell, James; University of Leeds, Leeds Institute of Health Sciences |
| <b>Primary Subject Heading</b>: | Public health                                                                                                                                                                                                                                                                                                                                                           |
| Secondary Subject Heading:      | Health policy, Health services research, Infectious diseases, Evidence based practice                                                                                                                                                                                                                                                                                   |
| Keywords:                       | Public health < INFECTIOUS DISEASES, Tuberculosis < INFECTIOUS DISEASES, PUBLIC HEALTH, Health policy < HEALTH SERVICES ADMINISTRATION & MANAGEMENT                                                                                                                                                                                                                     |
|                                 |                                                                                                                                                                                                                                                                                                                                                                         |

SCHOLARONE™  
Manuscripts

Only

## Involving the Private Medical Sector in TB Control in Bangladesh: a mixed method study

Authors: Zafar Ullah A N<sup>1</sup>; Huque R<sup>2</sup>; Husain A<sup>3</sup>; Akter S<sup>4</sup>; Islam A<sup>5</sup>; Newell J N<sup>1</sup>

### Abstract

**Objectives:** In Bangladesh, private health care is common and popular, regardless of income or area of residence, making the private sector an important player in health service provision. Although the private sector offers a good range of health services, tuberculosis (TB) care in the private sector is poor. We conducted research in Dhaka between 2004 and 2008 to develop and evaluate a Public-Private Partnership (PPP) model to involve Private Medical Practitioners (PMPs) within the National TB Control Programme (NTP)'s activities. Since 2008, this PPP model has been scaled up in two other big cities – Chittagong and Sylhet. This paper reports the results of this development, evaluation and scale up.

**Design:** Mixed method, observational study design. We used NTP service statistics to compare the TB control outcomes between intervention and control areas. To capture detailed insights of PMPs and TB managers about the process and outcomes of the study, we conducted in-depth interviews, focus group discussions, and workshops.

**Setting:** Urban setting – piloted in four areas in Dhaka city; later scaled up in other areas of Dhaka and in two major cities.

**Findings:** The partnership with PMPs yielded significantly increased case finding of sputum smear positive TB cases. Between 2004 and 2010, 703 participating PMPs referred 3,959 sputum smear positive TB cases to the designated DOTS centres – contributing about 36% of all TB cases in the project areas. There was a steady increase in case notification rates in the project areas following implementation of the partnership.

**Conclusions:** The PPP model was highly effective in improving access and quality of TB care in urban settings.

---

<sup>1</sup> Nuffield Centre for International Health and Development, Leeds Institute of Health Sciences, University of Leeds, United Kingdom. Correspondence should be sent to Dr. Zafar Ullah at this address ([hss1anuz@leeds.ac.uk](mailto:hss1anuz@leeds.ac.uk))

<sup>2</sup> Department of Economics, University of Dhaka, Bangladesh

<sup>3</sup> National Tuberculosis Control Programme, Bangladesh

<sup>4</sup> Society for Empowerment, Education and Development (SEED), Bangladesh

<sup>5</sup> Associate Director, BRAC Health Programme, Bangladesh

## Introduction

Despite the availability of effective treatment, the ability to control tuberculosis (TB) remains uncertain. Current estimates suggest that globally there are over 8.8 million new TB cases, and nearly 1.5 million people die from TB yearly: 98% of these cases and deaths occur in developing countries.<sup>1</sup> The World Health Organisation (WHO) predicts that 36 million people will die of TB between 2002 and 2020 if control measures do not improve.<sup>2-4</sup> Bangladesh is among the top ten high TB burden countries; the prevalence and incidence rates of all forms of TB are estimated to be 411 and 225 per 100,000 population respectively.<sup>1</sup> To reduce this burden, the National TB Control Programme (NTP) has adopted the DOTS strategy, delivered primarily through government-run health facilities.<sup>5</sup> However, major obstacles to implementation remains primarily due to insufficient infrastructure and shortage of appropriately trained health personnel.<sup>6,7</sup> These limitations mean many people with the signs and symptoms of TB must travel considerable distances to obtain TB care, have lengthy waits to be seen when they arrive, and may not be dealt with appropriately. Health facility opening times that are inconvenient for working people also limit accessibility to and acceptability of Direct Observation of Treatment (DOT), a central component of DOTS. Furthermore, there is considerable stigma associated with TB, both in its own right and because of its association with HIV/AIDS. These factors combine to limit patients' desire and ability to seek early diagnosis and treatment from public services. Consequently, large numbers of people with chest symptoms initially seek care from private health care providers.

Private healthcare is common in Bangladesh and popular amongst all, regardless of income or location. Apart from the NGOs, all other private or non-government sector health providers are generally considered to be as medically trained providers working for-profit and located outside of the government health system. The private sector also incorporates a large number of privately-managed auxiliary health services such as diagnostic laboratories, ambulance services and pharmacies/drugstores.<sup>8</sup> These private health care providers are available in abundance in urban areas.<sup>9-11</sup> However, there are countless untrained or non-qualified providers in Bangladesh who offer a combination of traditional (e.g. Unani, ayurvedic etc.) and western (allopathic) types of medicine but they are primarily found in rural areas.<sup>8</sup> Although the private sector offers a range of good quality health services, as in many other countries, the care they provide for TB is poor with over-reliance on radiology (e.g. X-ray) for diagnosis, use of inappropriate treatment regimens, and poor case holding, leading to incomplete treatment and potentially to multi-drug resistant TB (MDR-TB).<sup>12-15</sup> Moreover, non-existent linkages with the public sector mean TB cases managed by private sector providers are neither recorded nor reported, so that routine cohort reporting is impossible, and outcomes are not consolidated in to the national data. Given the above context, the task of increasing access to and quality of TB care as well as increasing the case detection rate is enormous. To achieve this task, the NTP has recognised the need for an increased collaborative effort between the public and private health sector providers.

In this context, we conducted research to develop and evaluate a Public-Private Partnership (PPP) model to involve Private Medical Practitioners (PMPs) in the NTP's urban TB control activities, and to measure to what extent the outcomes of this partnership affect access to and quality of TB care. The development and piloting of the PPP model took place in four selected research sites in Dhaka city which spanned between 2004 and 2008. Since 2008, this PPP model has been scaled up in two other cities - Chittagong and Sylhet, in addition to



1 scaling up in other areas of Dhaka City. This paper reports the outcomes from this  
2 development, evaluation and scale up.

### 3 4 **Methods**

5  
6 Considering the research objectives and intended outcome of a change in policy and practice,  
7 an operational research methodology<sup>16,17</sup> was thought to be appropriate. A set of criteria  
8 underpinning the broader scope of operations research was employed to make the  
9 implementation process more participative and resource-effective, and to facilitate the scale  
10 up. Specific techniques and approaches drawn from both quantitative and qualitative research  
11 methods were used to collect multiple kinds of data for the study.<sup>18,19</sup>

12  
13 The study was set within the policy environment of a government-NGO collaboration,  
14 enabling participation of Society for Empowerment, Education and Development (SEED)  
15 and three other NGOs – Bangladesh Rural Advancement Committee (BRAC), Progoti Samaj  
16 Kallyan Protisthan (PSKP) and Population Services Training Centre (PSTC), who were  
17 undertaking TB control activities jointly with the NTP.

18  
19 Four areas of Dhaka City namely Mirpur, Rampura, Dokkhinkhan, and Kamrangirchar were  
20 selected purposively as the study sites, where the selected partner NGOs were located and  
21 had a DOTS centre; and where PMPs were major providers of health services. These study  
22 sites generally represent the geographic catchment areas of the selected NGOs covering a  
23 population of nearly one million.

24  
25 Within this partnership, SEED was the lead research partner; BRAC, PSKP and PSTC  
26 provided TB services (diagnosis, treatment and follow-up) through designated health centres  
27 whereas the NTP provided the overall policy guidelines and supported the organisation and  
28 management of the research activities. In Mirpur, PSKP provided TB services through two  
29 DOTS centres and PSTC had one DOTS centre in Rampura; whereas BRAC covered both  
30 Dokkhinkhan, and Kamrangirchar through one DOTS centre in each area. PMPs were agreed  
31 to refer the TB suspects and patients to these designated DOTS centres following the NTP  
32 guidelines. A technical committee was formed with representation from the NTP, partner  
33 NGOs and PMPs to advise on the operational issues and to support the smooth running of the  
34 partnership. A local Project Coordinator coordinated the project activities.

35  
36 We developed and implemented the PPP model in three phases:

- 37 • *Preparation phase*
  - 38 ○ Formation of a Technical Working Group Committee (TWGC)
  - 39 ○ Collection of pre-intervention baseline data
  - 40 ○ Identification of tasks/service components within the partnership, based on partners'  
41 diverse strengths.
- 42 • *Intervention phase*
  - 43 ○ Strengthening DOTS centres to provide the PPP service components
  - 44 ○ Orientation and training of PMPs on NTP guidelines/protocols
  - 45 ○ Adaptation of TB forms and registers to incorporate PPP components
  - 46 ○ Development of diagnostic, referral and treatment protocols and linkages
  - 47 ○ Development and organisation of Advocacy, Communication and Social Mobilisation  
48 (ACSM) initiatives involving all stakeholders
  - 49 ○ Monitoring and supervision of the partnership activities
  - 50 ○ Evaluation of pilot phase.

51  
52  
53  
54  
55  
56  
57  
58  
59  
60  
Zafar Ullah

- 1 • *Scale up phase*
- 2     ○ Identification and orientation of new partners
- 3     ○ Scale up.

4  
5 To evaluate the PPP, we compared TB outcomes in the intervention and control (non-PPP)  
6 areas using service statistics from the NTP and the five NGO DOTS centres involved in this  
7 project. We also collected additional baseline data from the selected PMPs (see Zafar Ullah *et*  
8 *al* 2010 for details), and used in-depth interviews, focus group discussions (FGDs) and  
9 workshops to capture PMPs' and TB managers' insights of the process and outcomes of the  
10 study (Table 1).

11  
12 *Table 1: evaluation methods, participants, tools and focus*

| Phase       | Method (n)                 | Participants (n)                                         | Tools                             | Focus                   |
|-------------|----------------------------|----------------------------------------------------------|-----------------------------------|-------------------------|
| Preparation | • Survey (1)               | • PMPs (60)                                              | • Semi-structured questionnaire   | • Process               |
|             | • In-depth interviews (42) | • NTP managers (12)<br>• NGO managers (6)<br>• PMPs (24) | • Semi-structured questionnaire   | • Process<br>• Outcomes |
|             | • FGDs (4)                 | • PMPs (24)                                              | • FGD guidelines                  | • Process               |
| Evaluation  | • Workshops (2)            | • PMPs (60: 30 per workshop)                             | • Agenda<br>• Workshop guidelines | • Process<br>• Outcomes |
|             | • Follow-up interviews     | • PMPs (12)                                              | • Semi-structured questionnaire   | • Process<br>• Outcomes |

14  
15 Analysis of quantitative data was done primarily by tabulations and graphs using SPSS and  
16 Microsoft Excel programmes, and of qualitative data by thematic analysis.

17  
18 Ethical approvals were obtained from University of Leeds, United Kingdom and also from  
19 relevant in-country institutions including the Directorate General of Health Services, and  
20 Bangladesh National TB Control Programme. We have ensured all respondents their rights to  
21 anonymity and confidentiality. A written informed consent was obtained from each  
22 participant of the in-depth interviews and FGDs.

## 23 24 Findings

### 25 26 *Pilot Implementation (2004-2008)*

27  
28 At inception in 2004, the PPP included 97 PMPs but by the end of 2009 this had risen to 703.  
29 There was continuous enrolment of PMPs: although numbers fluctuated due to retirements  
30 and relocation, no PMPs chose to leave the PPP for any other reasons. The male:female ratio  
31 was 6:1, reflecting the ratio amongst urban private health service providers.

32  
33 All 703 PMPs were trained to provide quality TB care. As PMPs made it clear they were  
34 unwilling to set aside more than two days for training, we tailor-made a two-day training  
35 module (based on a training needs assessment) that included technical aspects of TB care,  
36 operational aspects of the PPP, and TB record-keeping.

37  
38 We used a participatory approach involving all stakeholders including PMPs to develop and  
39 revise the tools and forms. National recording and reporting forms and registers were revised

40  
41  
42  
43  
44  
45  
46  
47  
48  
49  
50  
51  
52  
53  
54  
55  
56  
57  
58  
59  
60  
*Zafar Ullah*

1 to incorporate PPP elements, and to maintain records of the referrals from PMPs. These were  
 2 field-tested and reviewed before use. We revised the NTP's TB treatment algorithm to  
 3 incorporate a flexible referral mechanism, which allowed the DOTS centres to refer TB  
 4 suspects/patients back to their respective PMPs, if they wished. We also used a participatory  
 5 approach to develop ACSM materials, which were made context-specific using baseline  
 6 survey data. These advocacy activities had a major role in influencing policy makers to  
 7 endorse the PPP model for country-wide scale-up.

8  
 9 PMPs initially expected financial support from the NTP as a partnership component. This  
 10 expectation was discussed with all stakeholders and it was agreed that any financial incentive  
 11 would jeopardise the partnership and could prove unsustainable in the long run. At the  
 12 beginning of the partnership, PMPs also expressed a lack of confidence about the quality of  
 13 public sector TB services, especially of diagnosis using sputum microscopy and the NTP-  
 14 recommended treatment regimen. This study addressed these issues through joint  
 15 development and monitoring of partnership activities and strong advocacy and  
 16 communication campaigns.

### 17 Quantitative findings

18  
 19  
 20 Within the project period (2004-2008), a total of 3,585 sputum smear positive (SS+) TB  
 21 patients were registered in the five DOTS centres in the project areas; of these 647 were  
 22 referred by PMPs. Numbers referred rose progressively over the period (Table 2).

23  
 24 *Table 2: SS+ TB cases registered in the PPP areas*

|                                     | 2004 | 2005 | 2006 | 2007 | 2008 | Total       |
|-------------------------------------|------|------|------|------|------|-------------|
| Total SS+ TB cases in the PPP areas | 533  | 673  | 800  | 830  | 749  | <b>3585</b> |
| Total SS+ TB cases referred by PMPs | 11   | 54   | 143  | 164  | 275  | <b>647</b>  |
| PMPs' contribution (%)              | 2    | 8    | 18   | 20   | 37   | <b>18</b>   |

25  
 26  
 27 The case notification rate for new SS+ TB cases in the study areas increased steadily over the  
 28 project period, and was consistently higher than the national average. By 2008 the rate in the  
 29 study areas was 94/100,000 while the national rate was 73/100,000 (Figure 1). The study rate  
 30 was also consistently higher than that in Dhaka Metropolitan City, which encloses the study  
 31 sites (Figure 1).

32  
 33 *Figure 1: Case notification rates of new SS+ TB cases in Dhaka Metropolitan City\* and the*  
 34 *PPP project areas*

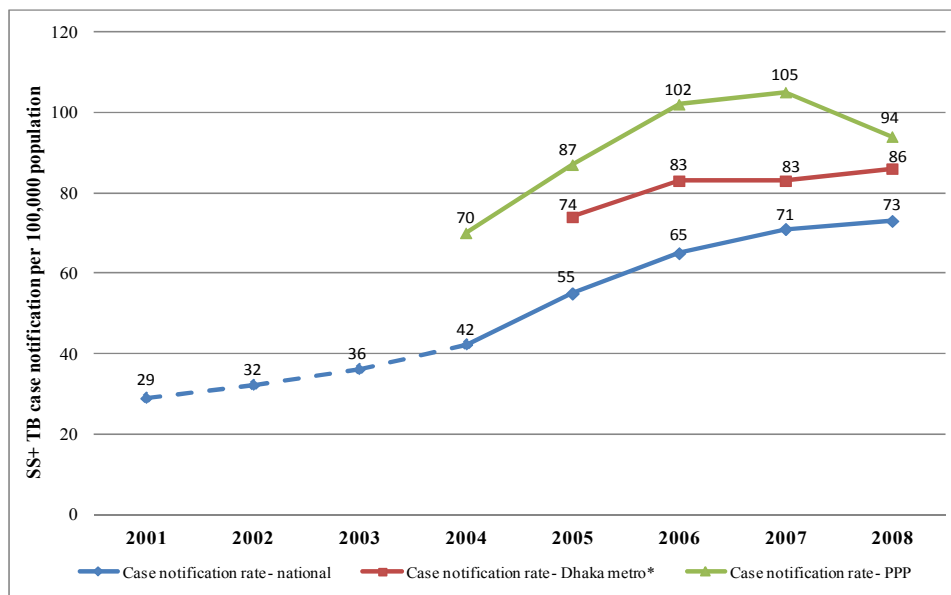

\*Data for Dhaka Metropolitan City available only from 2005, when the NTP started reporting for Metropolitan areas.

Another noticeable impact of the PPP was a large increase in numbers of cases of extra-pulmonary TB registered over time (Figure 2).

Figure 2: Numbers of extra-pulmonary TB cases registered in the PPP DOTS Centres

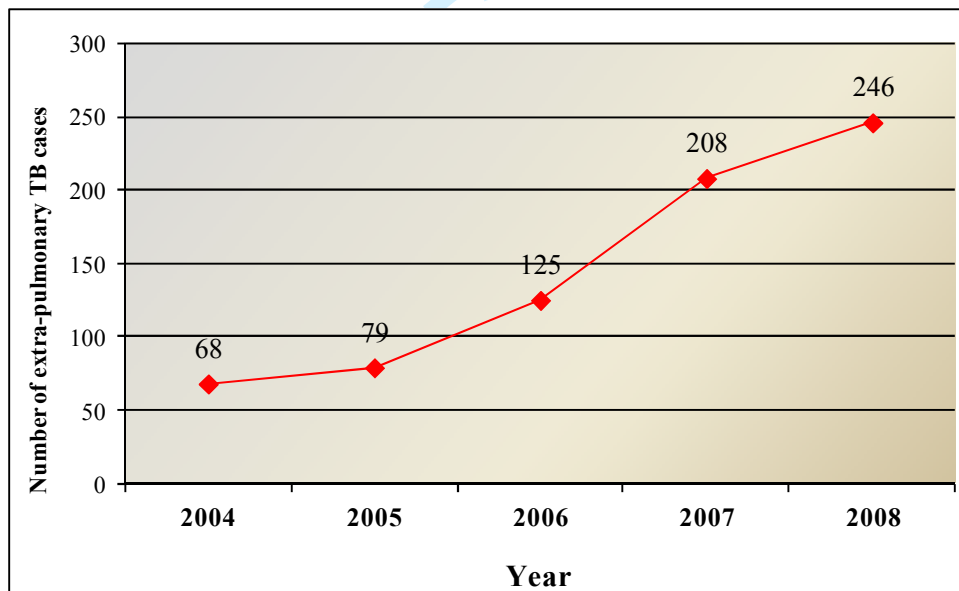

PMPs made a significant contribution to the numbers of TB suspects examined in the designated labs in the four PPP areas: in total 2,756 of the 24,678 TB suspects examined were referred by PMPs, with a steady rise over the study period (Figure 3).

Figure 3: Numbers of TB suspects receiving sputum microscopy in the PPP project areas



**Scaling up and getting research into policy and practice (GRIPP)**

Based on the PPP pilot results, the NTP started implementing the PPP model in other cities – Chittagong (from 2007), Sylhet (2008), and other areas of Dhaka (2009) – covering more than 15 million people. In Chittagong, five NGO partners collaborated with the NTP to support the PPP; in Sylhet, BRAC was the only NGO service provider, but two medical college hospitals were also involved. In the scale-up areas, PMPs have made a substantial contribution to the NTP’s effort to control TB in Bangladesh (Figure 4 and Table 3).

Figure 4: SS+TB patients registered in PPP scale up areas and PMP’s contribution, 2007-2010



### Overall impact of the PPP on TB Control

The involvement of PMPs substantially increased case finding of SS+ TB cases, a key TB control indicator. The partnership yielded significant contribution in identifying SS+ TB cases – from the inception of the PPP in 2004 until 2010, 703 participating PMPs referred almost 19,000 TB suspects and 3,959 SS+ TB cases to the designated DOTS centres (Figure 5). Overall, almost 36% of all SS+ TB cases were attributable to involvement of the private sector providers (Table 3).

Figure 5: Overall PMP contribution to identifying TB suspects in all PPP areas, 2004-2010 (including scale up)

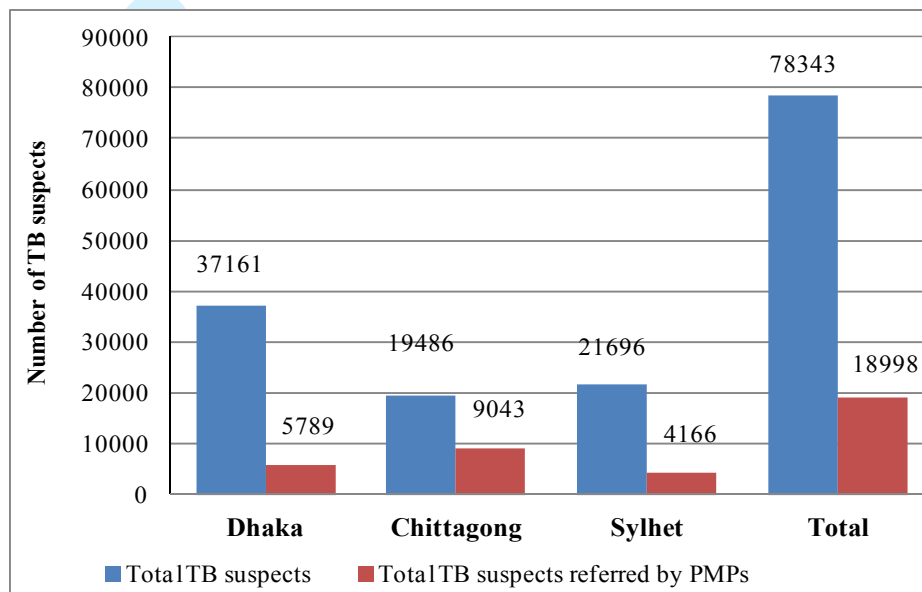

Table 3: Total SS+TB patients in all PPP areas and PMP's contribution, 2004-2010

|                                     | Dhaka | Chittagong | Sylhet | Total        |
|-------------------------------------|-------|------------|--------|--------------|
| Total SS+ TB cases in the PPP areas | 5199  | 3748       | 2068   | <b>11015</b> |
| Total SS+ TB cases referred by PMPs | 1214  | 2028       | 717    | <b>3959</b>  |
| PMPs' contribution %                | 23    | 54         | 35     | <b>36</b>    |

### Qualitative findings

The qualitative evaluation revealed that the participatory approach of planning and designing the PPP including involvement of all stakeholders in the process of selecting service components, selecting partners, and monitoring of the PPP played a crucial part in securing commitment and ownership from all parties involved. Virtually all PMPs interviewed (96%) mentioned having a positive experience in regard to the monitoring and support mechanism of the project, which was key to the success of the project implementation, and paved the way for scale-up. Specifically, they valued the monthly field visit by the project field staff. In reply to the question: "Do you own this project?" a popular PMP spontaneously replied "Oh, yes. No doubt about it". He went on to say "I have been consulted throughout the planning

1  
2  
3 1 *process of the project, and later we have jointly implemented it. So, this is our project. I am*  
4 2 *part of it”.*  
5 3

6 4 The quarterly review meetings were organised in rotation by the NTP and the partner NGOs  
7 5 either in the NTP’s conference room or in one of the NGO’s working locations. When asked  
8 6 about these arrangements, both the NTP and NGOs expressed their satisfaction and expressed  
9 7 their commitment to maintaining this practice in future collaborations.  
10 8

11 9 All PMPs interviewed (n=24) said they had no problems using the referral and other forms.  
12 10 *“The [TB related] registers and referral forms are quite simple and user-friendly, and easy*  
13 11 *to maintain”* said a busy practitioner. The NTP managers said they were amazed by the fact  
14 12 that most PMPs were keeping records. The PMPs also liked the system of referral back to the  
15 13 referring practitioners, which preserved their professional and commercial interests.  
16 14 However, a few PMPs were unhappy as they felt they did not get sufficient feedback about  
17 15 the patients they had referred, even though feedback was regularly given to PMPs through  
18 16 monthly field visits and during quarterly review meetings.  
19 17

20 18 The evaluation revealed major challenges in managing the PPP. It was difficult to bring such  
21 19 a heterogeneous group under one umbrella, especially in the early stages of the partnership  
22 20 process.  
23 21

24 22 Another important finding was that the public, NGO and private sector providers showed  
25 23 strong commitment and willingness to work together to achieve the common goal of TB  
26 24 control, although PMPs were initially sceptical about the motive of the public sector  
27 25 regarding this partnership, and the public sector and NGOs were initially doubtful whether  
28 26 PMPs would sacrifice their time to participate in such partnerships.  
29 27

30 28 In the absence of a regulatory mechanism, the PPP was primarily based on good relationships  
31 29 and dialogue. Both NTP and NGO respondents stated that they were sometimes  
32 30 overburdened with the extra work needed to implement the partnership activities. The NTP  
33 31 was hit harder than the partner NGOs, because there was a shortage of staff within the NTP  
34 32 management. Other key challenges encountered during implementation were to maintain the  
35 33 progress of the partnership, as it evolved, and to ensure joint ownership of decisions and  
36 34 collective responsibility for the direction and activities of the partnership. One senior PMP  
37 35 said *“Initially I thought this partnership would fail because I had serious reservations about*  
38 36 *negative attitudes of government officials. They [government officials] don’t know how to*  
39 37 *give respect to anybody other than their bosses. But after getting the chance to work with the*  
40 38 *NTP, I have now changed my mind. I have found the government officials now behave much*  
41 39 *better than they used to do in the past”.*  
42 40

#### 43 41 **Discussion and conclusion**

44 42

45 43 The PPP model was highly effective in improving access to and quality of TB care in urban  
46 44 settings, as evidenced by a steady increase in case notification since implementation of the  
47 45 partnership, exceeding internationally agreed targets, and consistently maintained much  
48 46 higher rates than the national average.  
49 47

50 48 Systematic implementation of the PPP led to greater and effective involvement of PMPs,  
51 49 resulting in increased access to quality TB care. However, needs-based training is necessary  
52 50  
53 51  
54 52  
55 53  
56 54  
57 55  
58 56  
59 57  
60 58

Zafar Ullah

1 for PMPs to enhance their knowledge on the NTP guidelines in regard to appropriate  
2 diagnosis, treatment, and follow-up to guarantee the continuity of quality of TB care.

3  
4 The tools and protocols, and ACSM materials proved vital to facilitating the partnership. The  
5 lessons learned from this partnership formed the basis of the National PPM (Public-Private  
6 Mix) guidelines. The revised tools and guidelines considerably improved the quality of TB  
7 reporting, thus strengthened the health information available. The revised protocol for  
8 referrals gave PMPs confidence that they would not lose their patients, which greatly  
9 increased their motivation to remain in the partnership.

10  
11 The key challenges encountered during implementation were to maintain the momentum as  
12 the partnership evolved, and to ensure joint ownership of decisions and collective  
13 responsibility for the direction and activities of the partnership. The NTP's and other  
14 partners' commitment and nurturing of an atmosphere where all stakeholders could feel  
15 involved in the partnership were critical to overcoming these challenges.

16  
17 It was possible to bring the public, NGOs and private sector providers together to work  
18 towards achieving a common public health goal despite perceived barriers between public  
19 and private sector providers, initial scepticism about forming the partnership, and challenges  
20 during implementation of the PPP. The participatory development of the partnership and  
21 maintaining close linkages with the PMPs helped them to gain confidence and trust over the  
22 public sector services, which in turn facilitated the development of a close relationship with  
23 the NTP and NGO partners. However, in order to develop and sustain such a partnership,  
24 roles and responsibilities of participating agencies and individuals must be defined. These  
25 findings are consistent with the outcomes of other much smaller operational research projects  
26 implemented elsewhere.<sup>15,20-25</sup>

27  
28 Finally, this study demonstrated that TB control outcomes could be achieved by combining  
29 the diverse strengths and advantages of the public and private sectors, NGOs and a group of  
30 selected PMPs. High rates of case detection were attained without involving all private  
31 practitioners in the area, thus making the PPP technically attractive to national programmes in  
32 other countries in terms of feasibility of implementation and wider scale up.

### 33 34 **Acknowledgements**

35 We thank the patients, PMPs, and NGOs involved in this study, and the Bangladesh NTP for  
36 permission to carry out the study. We also thank an anonymous professional colleague who  
37 reviewed the revised manuscript.

38  
39 **Funding:** This study was funded by the Department for International Development (DFID)  
40 of the United Kingdom through the COMDIS research programme consortium; however,  
41 DFID does not take any responsibility for any information provided or views expressed.

42  
43 **Conflicts of interest:** none declared.

44  
45 **Authors contributions:** ZU conceived and designed the study, led the data collection and  
46 analysis, and preparation of the manuscript; RH participated in the data analysis and in the  
47 preparation of the manuscript; AH participated in data collection and analysis; SA  
48 coordinated the study implementation and data collection; AI participated in data collection;  
49 JNN participated in the design of the study, advised on data collection and analysis and  
50 participated in the preparation of the manuscript.

51  
52  
53  
54  
55  
56  
57  
58  
59  
60  
*Zafar Ullah*



1  
2  
3  
4  
5  
6  
7  
8  
9  
10  
11  
12  
13  
14  
15  
16  
17  
18  
19  
20  
21  
22  
23  
24  
25  
26  
27  
28  
29  
30  
31  
32  
33  
34  
35  
36  
37  
38  
39  
40  
41  
42  
43  
44  
45  
46  
47  
48  
49  
50  
51  
52  
53  
54  
55  
56  
57  
58  
59  
60

1  
2  
3  
4  
5  
6  
7  
8  
9  
10  
11  
12  
13  
14  
15  
16  
17  
18  
19  
20  
21  
22  
23  
24  
25  
26  
27  
28  
29  
30  
31  
32  
33  
34  
35  
36  
37  
38  
39  
40  
41  
42  
43  
44  
45  
46  
47  
48  
49  
50

## References

1. World Health Organisation. *Global Tuberculosis Control: World Health Organisation Report 2011*; Geneva: World Health Organisation.
2. World Health Organisation. *Tuberculosis Factsheet 2002*; Factsheet Number 104, Revised August 2002; Geneva: World Health Organisation.
3. Grange JM, Zumla A. The global emergency of tuberculosis: What is the cause? *J R Soc Health*, 2002; **122**: 78–81.
4. Benatar S, Brock G. *Global Health and Global Health Ethics*; Cambridge, United Kingdom: Cambridge University Press, 2011
5. Guda DR, Khandaker IU, Parveen SD, and Whitson T. *Bangladesh: NGO and Public Sector Tuberculosis Service Delivery—Rapid Assessment Results*; Published for the United States Agency for International Development by the Quality Assurance Project; December 2004.
6. World Health Organisation. *Tuberculosis and Health Sector Reforms in Bangladesh – A Concept Paper*, 2004. New Delhi: World Health Organisation, Regional Office for South-East Asia.
7. The National Tuberculosis Control Programme (NTP). *Annual report 2007* Dhaka: Government of Bangladesh.
8. Barkat A, Maksud AKM. *Private Sector Health Services in Bangladesh: An Exploratory Study*, prepared for Engender Health, Dhaka, 2003.
9. UNICEF. *Public-private partnership in the social sector- part two: country experiences, 1999*: 219–291; Dhaka: UNICEF Bangladesh.
10. Zafar Ullah AN, Lubben M, Newell JN. A model for effective involvement of private medical practitioners in TB care. *International Journal of Health Planning and Management*, 2004, **19** (3): 227–245.
11. World Bank. *Comparative Advantages of Public and Private Health Care Providers in Bangladesh; Bangladesh Development Series Paper No. 4, 2005*; South Asia Human Development Unit, Dhaka: The World Bank Office.
12. Zafar Ullah AN, Huque R, Begum V, Newell JN, Gerein N. Public-private partnership for TB control in Bangladesh: role of private medical practitioners in the management of TB patients. *World Medical & Health Policy*, 2010; **2** (1), Article 13.
13. Uplekar MW, Juvekar SK, Monarkar S, Rangan S, Nunn P. Tuberculosis patients and practitioners in private clinics in India, *Int J Tuberc Lung Dis*, 1998; **2**: 324–9.
14. World Health Organisation. *Involving private medical practitioners in TB and STI control, 2001*. New Delhi: World Health Organisation.
15. Newell JN, Pande SB, Baral SC, Bam DS, Malla P. Control of Tuberculosis in an urban setting in Nepal: public-private partnership. *Bull World Health Organ*, 2004; **82**: 92–98.
16. Walley J, Graham K, Wei X, Kain K, Weston R. Getting research into practice: primary care management of noncommunicable diseases in low-and middle income countries, *Bull World Health Organ*, 2012; 90:402.
17. Zachariah R, Harries AD, Ishikawa N Rieder HL, Bissell K, Laserson K, Massaquoi M, Van Herp M, Reid T. Operational research in low-income countries: what, why, and how? *Lancet Infectious Disease*, 2009; **9**, 711–717.
18. Johnson RB, Onwuegbuzie AJ. Mixed methods research: A research paradigm whose time has come. *Educational Researcher*, 2004; **33**, 14–26.
19. Patton MQ. *Qualitative Research & Evaluation Methods*; 3<sup>rd</sup> Eds. London: Sage Publications, 2002.

- 1  
2  
3 1 20. Newell JN, Pande SB, Baral SC, Bam DS, Malla P. Leadership, management and  
4 2 technical lessons learnt from a successful public-private partnership for TB control in  
5 3 Nepal, *Int J Tuberc Lung Dis*, 2005; **9**(9):1013–1017.  
6 4  
7 4 21. Porter JD, Ogden JA, Rao PV, Rao VP, Rajesh D, Buskade RA, Soutar D.  
8 5 Introducing operations research into management and policy practices of a non-  
9 6 governmental organization (NGO): a partnership between an Indian leprosy NGO and  
10 7 an international academic institution. *Health Policy Plan*; 2004; **19**(2): 80–87.  
11 8  
12 9 22. Rangan S. The Public-Private Mix in India's Revised National Tuberculosis Control  
13 10 Programme: An Update, *J Indian Med Assoc*. 2003;**101**(3): 161–163.  
14 11  
15 12 23. Rangan S, Rasalpurkar SB, Morankar SN, Joshi AN, Porter JDH. Tuberculosis  
16 13 control in rural India: lessons from public- private collaboration, *Int J Tuberc Lung*  
17 14 *Dis*, 2004; **8**: 552.  
18 15  
19 16 24. Dewan P, Lal SS, Lonroth K, Wares F, Uplekar M, Sahu S, Granich R, Chauhan LS.  
20 17 Improving Tuberculosis Control through Public-Private Collaboration in India:  
21 18 Literature Review; *BMJ* 2006; **332**: 574–578.  
22 19  
23 16 25. Dreesch N, Nyoni J, Mokopakgosi O, Seipone K, Kalilani JA, Kaluwa O, Musowe V.  
24 17 Public-private options for expanding access to human resources for HIV/AIDS in  
25 18 Botswana; *Human Resources for Health*, 2007;**5**: 25.  
26 19  
27  
28  
29  
30  
31  
32  
33  
34  
35  
36  
37  
38  
39  
40  
41  
42  
43  
44  
45  
46  
47  
48  
49  
50  
51  
52  
53  
54  
55  
56  
57  
58  
59  
60

1  
2  
3  
4  
5  
6  
7  
8  
9  
10  
11  
12  
13  
14  
15  
16  
17  
18  
19  
20  
21  
22  
23  
24  
25  
26  
27  
28  
29  
30  
31  
32  
33  
34  
35  
36  
37  
38  
39  
40  
41  
42  
43  
44  
45  
46  
47  
48  
49  
50  
51  
52  
53  
54  
55  
56  
57  
58  
59  
60

## **Title**

Involving the Private Medical Sector in TB Control in Bangladesh: a mixed method study

## **Article Focus**

- To assess the effectiveness of a Public-Private Partnership (PPP) model to involve private medical sector in TB control
- To ascertain whether scaling up of the PPP model approach to engage PMPs is feasible and has an effect on case notification rate.

## **Key messages**

- This study demonstrated the feasibility and effectiveness of providing TB care through involving private sector health care providers
- The PPP substantially improved access to and quality of TB care in urban settings, as evidenced by increased TB case notification rate and increased treatment success rate.
- Our results show that it is feasible to scale up a public-private partnership within the national TB control programme.

## **Strengths and Limitations**

- As TB continues to be a major threat to public health in low- and middle-income countries, and is re-emerging as an issue for concern in high-income countries, the findings of this study provide evidence for national and international scale-up of such partnerships
- By using both quantitative and qualitative methods, this study has permitted more in-depth analysis of the effectiveness of this PPP model
- From the beginning, the study was guided by a vision of nation-wide scale up.

## Involving the Private Medical Sector in TB Control in Bangladesh: a mixed method study

Authors: Zafar Ullah A N<sup>1</sup>; Huque R<sup>2</sup>; Husain A<sup>3</sup>; Akter S<sup>4</sup>; Islam A<sup>5</sup>; Newell J N<sup>1</sup>

### Abstract

**Objectives:** In Bangladesh, private health care is common and popular, regardless of income or area of residence, making the private sector an important player in health service provision. Although the private sector offers a good range of health services, tuberculosis (TB) care in the private sector is poor. We conducted research in Dhaka between 2004 and 2008 to develop and evaluate a Public-Private Partnership (PPP) model to involve Private Medical Practitioners (PMPs) within the National TB Control Programme (NTP)'s activities. Since 2008, this PPP model has been scaled up in two other big cities – Chittagong and Sylhet. This paper reports the results of this development, evaluation and scale up.

**Design:** Mixed method, observational study design. We used NTP service statistics to compare the TB control outcomes between intervention and control areas. To capture detailed insights of PMPs and TB managers about the process and outcomes of the study, we conducted in-depth interviews, focus group discussions, and workshops.

**Setting:** Urban setting – piloted in four areas in Dhaka city; later scaled up in other areas of Dhaka and in two major cities.

**Findings:** The partnership with PMPs yielded significantly increased case finding of sputum smear positive TB cases. Between 2004 and 2010, 703 participating PMPs referred 3,959 sputum smear positive TB cases to the designated DOTS centres – contributing about 36% of all TB cases in the project areas. There was a steady increase in case notification rates in the project areas following implementation of the partnership.

**Conclusions:** The PPP model was highly effective in improving access and quality of TB care in urban settings.

---

<sup>1</sup> Nuffield Centre for International Health and Development, Leeds Institute of Health Sciences, University of Leeds, United Kingdom. Correspondence should be sent to Dr. Zafar Ullah at this address ([hss1anuz@leeds.ac.uk](mailto:hss1anuz@leeds.ac.uk))

<sup>2</sup> Department of Economics, University of Dhaka, Bangladesh

<sup>3</sup> National Tuberculosis Control Programme, Bangladesh

<sup>4</sup> Society for Empowerment, Education and Development (SEED), Bangladesh

<sup>5</sup> Associate Director, BRAC Health Programme, Bangladesh

## Introduction

Despite the availability of effective treatment, the ability to control tuberculosis (TB) remains uncertain. Current estimates suggest that globally there are over 8.8 million new TB cases, and nearly 1.5 million people die from TB yearly: 98% of these cases and deaths occur in developing countries.<sup>1</sup> The World Health Organisation (WHO) predicts that 36 million people will die of TB between 2002 and 2020 if control measures do not improve.<sup>2-4</sup> Bangladesh is among the top ten high TB burden countries; the prevalence and incidence rates of all forms of TB are estimated to be 411 and 225 per 100,000 population respectively.<sup>1</sup> To reduce this burden, the National TB Control Programme (NTP) has adopted the DOTS strategy, delivered primarily through government-run health facilities.<sup>5</sup> However, major obstacles to implementation remains primarily due to insufficient infrastructure and shortage of appropriately trained health personnel.<sup>6,7</sup> These limitations mean many people with the signs and symptoms of TB must travel considerable distances to obtain TB care, have lengthy waits to be seen when they arrive, and may not be dealt with appropriately. Health facility opening times that are inconvenient for working people also limit accessibility to and acceptability of Direct Observation of Treatment (DOT), a central component of DOTS. Furthermore, there is considerable stigma associated with TB, both in its own right and because of its association with HIV/AIDS. These factors combine to limit patients' desire and ability to seek early diagnosis and treatment from public services. Consequently, large numbers of people with chest symptoms initially seek care from private health care providers.

Private healthcare is common in Bangladesh and popular amongst all, regardless of income or location. Apart from the NGOs, all other private or non-government sector health providers are generally considered to be as medically trained providers working for-profit and located outside of the government health system. The private sector also incorporates a large number of privately-managed auxiliary health services such as diagnostic laboratories, ambulance services and pharmacies/drugstores.<sup>8</sup> These private health care providers are available in abundance in urban areas.<sup>9-11</sup> However, there are countless untrained or non-qualified providers in Bangladesh who offer a combination of traditional (e.g. Unani, ayurvedic etc.) and western (allopathic) types of medicine but they are primarily found in rural areas.<sup>8</sup>

Although the private sector offers a range of good quality health services, as in many other countries, the care they provide for TB is poor with over-reliance on radiology (e.g. X-ray) for diagnosis, use of inappropriate treatment regimens, and poor case holding, leading to incomplete treatment and potentially to multi-drug resistant TB (MDR-TB).<sup>12-15</sup> Moreover, non-existent linkages with the public sector mean TB cases managed by private sector providers are neither recorded nor reported, so that routine cohort reporting is impossible, and outcomes are not consolidated in to the national data. Given the above context, the task of increasing access to and quality of TB care as well as increasing the case detection rate is enormous. To achieve this task, the NTP has recognised the need for an increased collaborative effort between the public and private health sector providers.

In this context, we conducted research to develop and evaluate a Public-Private Partnership (PPP) model to involve Private Medical Practitioners (PMPs) in the NTP's urban TB control activities, and to measure to what extent the outcomes of this partnership affect access to and quality of TB care. The development and piloting of the PPP model took place in four selected research sites in Dhaka city which spanned between 2004 and 2008. Since 2008, this PPP model has been scaled up in two other cities - Chittagong and Sylhet, in addition to

1 scaling up in other areas of Dhaka City. This paper reports the outcomes from this  
2 development, evaluation and scale up.

## 3 4 **Methods**

5  
6 Considering the research objectives and intended outcome of a change in policy and practice,  
7 an operational research methodology<sup>16,17</sup> was thought to be appropriate. A set of criteria  
8 underpinning the broader scope of operations research was employed to make the  
9 implementation process more participative and resource-effective, and to facilitate the scale  
10 up. Specific techniques and approaches drawn from both quantitative and qualitative research  
11 methods were used to collect multiple kinds of data for the study.<sup>18,19</sup>

12  
13 The study was set within the policy environment of a government-NGO collaboration,  
14 enabling participation of Society for Empowerment, Education and Development (SEED)  
15 and three other NGOs – Bangladesh Rural Advancement Committee (BRAC), Progoti Samaj  
16 Kallyan Protisthan (PSKP) and Population Services Training Centre (PSTC), who were  
17 undertaking TB control activities jointly with the NTP.

18  
19 Four areas of Dhaka City namely Mirpur, Rampura, Dokkhinkhan, and Kamrangirchar were  
20 selected purposively as the study sites, where the selected partner NGOs were located and  
21 had a DOTS centre; and where PMPs were major providers of health services. These study  
22 sites generally represent the geographic catchment areas of the selected NGOs covering a  
23 population of nearly one million.

24  
25 Within this partnership, SEED was the lead research partner; BRAC, PSKP and PSTC  
26 provided TB services (diagnosis, treatment and follow-up) through designated health centres  
27 whereas the NTP provided the overall policy guidelines and supported the organisation and  
28 management of the research activities. In Mirpur, PSKP provided TB services through two  
29 DOTS centres and PSTC had one DOTS centre in Rampura; whereas BRAC covered both  
30 Dokkhinkhan, and Kamrangirchar through one DOTS centre in each area. PMPs were agreed  
31 to refer the TB suspects and patients to these designated DOTS centres following the NTP  
32 guidelines. A technical committee was formed with representation from the NTP, partner  
33 NGOs and PMPs to advise on the operational issues and to support the smooth running of the  
34 partnership. A local Project Coordinator coordinated the project activities.

35  
36 We developed and implemented the PPP model in three phases:

- 37 • *Preparation phase*
  - 38 ○ Formation of a Technical Working Group Committee (TWGC)
  - 39 ○ Collection of pre-intervention baseline data
  - 40 ○ Identification of tasks/service components within the partnership, based on partners'  
41 diverse strengths.
- 42 • *Intervention phase*
  - 43 ○ Strengthening DOTS centres to provide the PPP service components
  - 44 ○ Orientation and training of PMPs on NTP guidelines/protocols
  - 45 ○ Adaptation of TB forms and registers to incorporate PPP components
  - 46 ○ Development of diagnostic, referral and treatment protocols and linkages
  - 47 ○ Development and organisation of Advocacy, Communication and Social Mobilisation  
48 (ACSM) initiatives involving all stakeholders
  - 49 ○ Monitoring and supervision of the partnership activities
  - 50 ○ Evaluation of pilot phase.

59 Zafar Ullah

- 1 • *Scale up phase*
- 2     ○ Identification and orientation of new partners
- 3     ○ Scale up.

4  
5 To evaluate the PPP, we compared TB outcomes in the intervention and control (non-PPP)  
6 areas using service statistics from the NTP and the five NGO DOTS centres involved in this  
7 project. We also collected additional baseline data from the selected PMPs (see Zafar Ullah *et*  
8 *al* 2010 for details), and used in-depth interviews, focus group discussions (FGDs) and  
9 workshops to capture PMPs' and TB managers' insights of the process and outcomes of the  
10 study (Table 1).

11  
12 *Table 1: evaluation methods, participants, tools and focus*

| Phase       | Method (n)                 | Participants (n)                                         | Tools                             | Focus                   |
|-------------|----------------------------|----------------------------------------------------------|-----------------------------------|-------------------------|
| Preparation | • Survey (1)               | • PMPs (60)                                              | • Semi-structured questionnaire   | • Process               |
|             | • In-depth interviews (42) | • NTP managers (12)<br>• NGO managers (6)<br>• PMPs (24) | • Semi-structured questionnaire   | • Process<br>• Outcomes |
|             | • FGDs (4)                 | • PMPs (24)                                              | • FGD guidelines                  | • Process               |
| Evaluation  | • Workshops (2)            | • PMPs (60: 30 per workshop)                             | • Agenda<br>• Workshop guidelines | • Process<br>• Outcomes |
|             | • Follow-up interviews     | • PMPs (12)                                              | • Semi-structured questionnaire   | • Process<br>• Outcomes |

14  
15 Analysis of quantitative data was done primarily by tabulations and graphs using SPSS and  
16 Microsoft Excel programmes, and of qualitative data by thematic analysis.

17  
18 Ethical approvals were obtained from University of Leeds, United Kingdom and also from  
19 relevant in-country institutions including the Directorate General of Health Services, and  
20 Bangladesh National TB Control Programme. We have ensured all respondents their rights to  
21 anonymity and confidentiality. A written informed consent was obtained from each  
22 participant of the in-depth interviews and FGDs.

## 23 24 Findings

### 25 26 Pilot Implementation (2004-2008)

27  
28 At inception in 2004, the PPP included 97 PMPs but by the end of 2009 this had risen to 703.  
29 There was continuous enrolment of PMPs: although numbers fluctuated due to retirements  
30 and relocation, no PMPs chose to leave the PPP for any other reasons. The male:female ratio  
31 was 6:1, reflecting the ratio amongst urban private health service providers.

32  
33 All 703 PMPs were trained to provide quality TB care. As PMPs made it clear they were  
34 unwilling to set aside more than two days for training, we tailor-made a two-day training  
35 module (based on a training needs assessment) that included technical aspects of TB care,  
36 operational aspects of the PPP, and TB record-keeping.

37  
38 We used a participatory approach involving all stakeholders including PMPs to develop and  
39 revise the tools and forms. National recording and reporting forms and registers were revised

40  
41  
42  
43  
44  
45  
46  
47  
48  
49  
50  
51  
52  
53  
54  
55  
56  
57  
58  
59  
60  
Zafar Ullah

1 to incorporate PPP elements, and to maintain records of the referrals from PMPs. These were  
 2 field-tested and reviewed before use. We revised the NTP's TB treatment algorithm to  
 3 incorporate a flexible referral mechanism, which allowed the DOTS centres to refer TB  
 4 suspects/patients back to their respective PMPs, if they wished. We also used a participatory  
 5 approach to develop ACSM materials, which were made context-specific using baseline  
 6 survey data. These advocacy activities had a major role in influencing policy makers to  
 7 endorse the PPP model for country-wide scale-up.

8  
 9 PMPs initially expected financial support from the NTP as a partnership component. This  
 10 expectation was discussed with all stakeholders and it was agreed that any financial incentive  
 11 would jeopardise the partnership and could prove unsustainable in the long run. At the  
 12 beginning of the partnership, PMPs also expressed a lack of confidence about the quality of  
 13 public sector TB services, especially of diagnosis using sputum microscopy and the NTP-  
 14 recommended treatment regimen. This study addressed these issues through joint  
 15 development and monitoring of partnership activities and strong advocacy and  
 16 communication campaigns.

### 17 Quantitative findings

18  
 19  
 20 Within the project period (2004-2008), a total of 3,585 sputum smear positive (SS+) TB  
 21 patients were registered in the five DOTS centres in the project areas; of these 647 were  
 22 referred by PMPs. Numbers referred rose progressively over the period (Table 2).

23  
 24 *Table 2: SS+ TB cases registered in the PPP areas*

|                                     | 2004 | 2005 | 2006 | 2007 | 2008 | Total       |
|-------------------------------------|------|------|------|------|------|-------------|
| Total SS+ TB cases in the PPP areas | 533  | 673  | 800  | 830  | 749  | <b>3585</b> |
| Total SS+ TB cases referred by PMPs | 11   | 54   | 143  | 164  | 275  | <b>647</b>  |
| PMPs' contribution (%)              | 2    | 8    | 18   | 20   | 37   | <b>18</b>   |

25  
 26  
 27 The case notification rate for new SS+ TB cases in the study areas increased steadily over the  
 28 project period, and was consistently higher than the national average. By 2008 the rate in the  
 29 study areas was 94/100,000 while the national rate was 73/100,000 (Figure 1). The study rate  
 30 was also consistently higher than that in Dhaka Metropolitan City, which encloses the study  
 31 sites (Figure 1).

32  
 33 *Figure 1: Case notification rates of new SS+ TB cases in Dhaka Metropolitan City\* and the*  
 34 *PPP project areas*



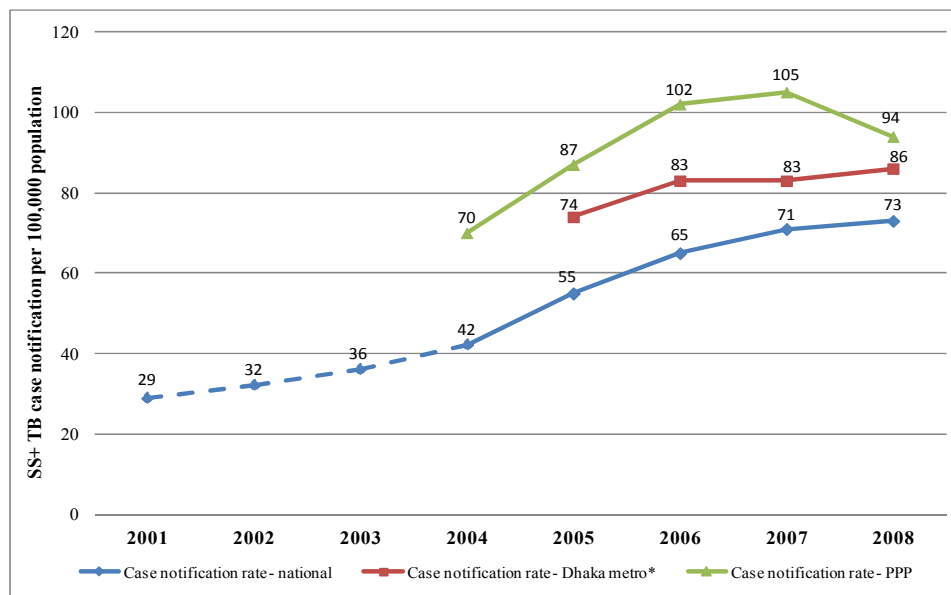

\*Data for Dhaka Metropolitan City available only from 2005, when the NTP started reporting for Metropolitan areas.

Another noticeable impact of the PPP was a large increase in numbers of cases of extra-pulmonary TB registered over time (Figure 2).

Figure 2: Numbers of extra-pulmonary TB cases registered in the PPP DOTS Centres

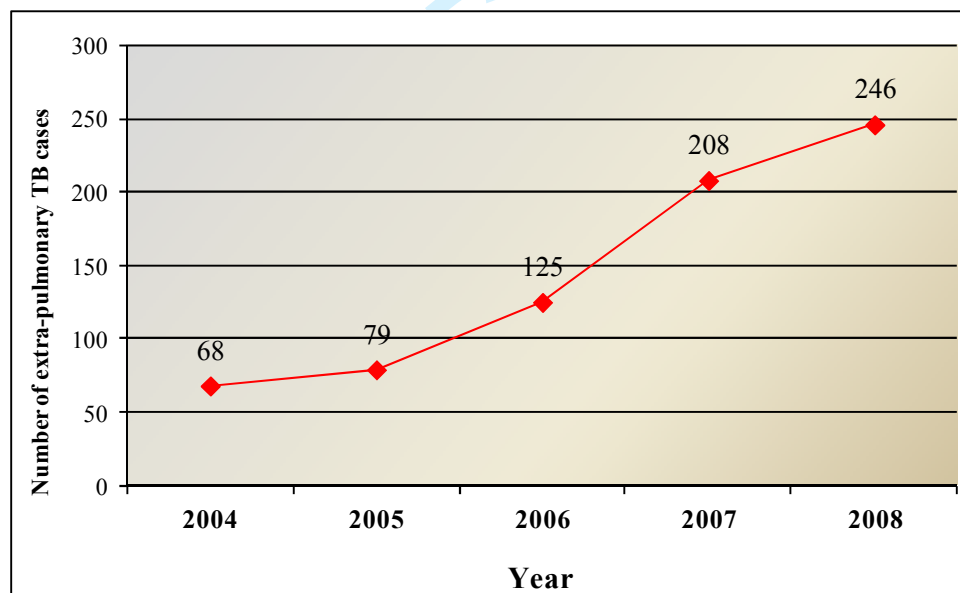

PMPs made a significant contribution to the numbers of TB suspects examined in the designated labs in the four PPP areas: in total 2,756 of the 24,678 TB suspects examined were referred by PMPs, with a steady rise over the study period (Figure 3).

Figure 3: Numbers of TB suspects receiving sputum microscopy in the PPP project areas



**Scaling up and getting research into policy and practice (GRIPP)**

Based on the PPP pilot results, the NTP started implementing the PPP model in other cities – Chittagong (from 2007), Sylhet (2008), and other areas of Dhaka (2009) – covering more than 15 million people. In Chittagong, five NGO partners collaborated with the NTP to support the PPP; in Sylhet, BRAC was the only NGO service provider, but two medical college hospitals were also involved. In the scale-up areas, PMPs have made a substantial contribution to the NTP’s effort to control TB in Bangladesh (Figure 4 and Table 3).

Figure 4: SS+TB patients registered in PPP scale up areas and PMP’s contribution, 2007-2010



### Overall impact of the PPP on TB Control

The involvement of PMPs substantially increased case finding of SS+ TB cases, a key TB control indicator. The partnership yielded significant contribution in identifying SS+ TB cases – from the inception of the PPP in 2004 until 2010, 703 participating PMPs referred almost 19,000 TB suspects and 3,959 SS+ TB cases to the designated DOTS centres (Figure 5). Overall, almost 36% of all SS+ TB cases were attributable to involvement of the private sector providers (Table 3).

Figure 5: Overall PMP contribution to identifying TB suspects in all PPP areas, 2004-2010 (including scale up)



Table 3: Total SS+TB patients in all PPP areas and PMP's contribution, 2004-2010

|                                     | Dhaka | Chittagong | Sylhet | Total        |
|-------------------------------------|-------|------------|--------|--------------|
| Total SS+ TB cases in the PPP areas | 5199  | 3748       | 2068   | <b>11015</b> |
| Total SS+ TB cases referred by PMPs | 1214  | 2028       | 717    | <b>3959</b>  |
| PMPs' contribution %                | 23    | 54         | 35     | <b>36</b>    |

### Qualitative findings

The qualitative evaluation revealed that the participatory approach of planning and designing the PPP including involvement of all stakeholders in the process of selecting service components, selecting partners, and monitoring of the PPP played a crucial part in securing commitment and ownership from all parties involved. Virtually all PMPs interviewed (96%) mentioned having a positive experience in regard to the monitoring and support mechanism of the project, which was key to the success of the project implementation, and paved the way for scale-up. Specifically, they valued the monthly field visit by the project field staff. In reply to the question: "Do you own this project?" a popular PMP spontaneously replied "Oh, yes. No doubt about it". He went on to say "I have been consulted throughout the planning

1 process of the project, and later we have jointly implemented it. So, this is our project. I am  
2 part of it”.

3  
4 The quarterly review meetings were organised in rotation by the NTP and the partner NGOs  
5 either in the NTP’s conference room or in one of the NGO’s working locations. When asked  
6 about these arrangements, both the NTP and NGOs expressed their satisfaction and expressed  
7 their commitment to maintaining this practice in future collaborations.

8  
9 All PMPs interviewed (n=24) said they had no problems using the referral and other forms.  
10 “The [TB related] registers and referral forms are quite simple and user-friendly, and easy  
11 to maintain” said a busy practitioner. The NTP managers said they were amazed by the fact  
12 that most PMPs were keeping records. The PMPs also liked the system of referral back to the  
13 referring practitioners, which preserved their professional and commercial interests.  
14 However, a few PMPs were unhappy as they felt they did not get sufficient feedback about  
15 the patients they had referred, even though feedback was regularly given to PMPs through  
16 monthly field visits and during quarterly review meetings.

17  
18 The evaluation revealed major challenges in managing the PPP. It was difficult to bring such  
19 a heterogeneous group under one umbrella, especially in the early stages of the partnership  
20 process.

21  
22 Another important finding was that the public, NGO and private sector providers showed  
23 strong commitment and willingness to work together to achieve the common goal of TB  
24 control, although PMPs were initially sceptical about the motive of the public sector  
25 regarding this partnership, and the public sector and NGOs were initially doubtful whether  
26 PMPs would sacrifice their time to participate in such partnerships.

27  
28 In the absence of a regulatory mechanism, the PPP was primarily based on good relationships  
29 and dialogue. Both NTP and NGO respondents stated that they were sometimes  
30 overburdened with the extra work needed to implement the partnership activities. The NTP  
31 was hit harder than the partner NGOs, because there was a shortage of staff within the NTP  
32 management. Other key challenges encountered during implementation were to maintain the  
33 progress of the partnership, as it evolved, and to ensure joint ownership of decisions and  
34 collective responsibility for the direction and activities of the partnership. One senior PMP  
35 said “Initially I thought this partnership would fail because I had serious reservations about  
36 negative attitudes of government officials. They [government officials] don’t know how to  
37 give respect to anybody other than their bosses. But after getting the chance to work with the  
38 NTP, I have now changed my mind. I have found the government officials now behave much  
39 better than they used to do in the past”.

## 40 41 Discussion and conclusion

42  
43 The PPP model was highly effective in improving access to and quality of TB care in urban  
44 settings, as evidenced by a steady increase in case notification since implementation of the  
45 partnership, exceeding internationally agreed targets, and consistently maintained much  
46 higher rates than the national average.

47  
48 Systematic implementation of the PPP led to greater and effective involvement of PMPs,  
49 resulting in increased access to quality TB care. However, needs-based training is necessary

1  
2  
3 1 for PMPs to enhance their knowledge on the NTP guidelines in regard to appropriate  
4 2 diagnosis, treatment, and follow-up to guarantee the continuity of quality of TB care.  
5 3

6 4 The tools and protocols, and ACSM materials proved vital to facilitating the partnership. The  
7 5 lessons learned from this partnership formed the basis of the National PPM (Public-Private  
8 6 Mix) guidelines. The revised tools and guidelines considerably improved the quality of TB  
9 7 reporting, thus strengthened the health information available. The revised protocol for  
10 8 referrals gave PMPs confidence that they would not lose their patients, which greatly  
11 9 increased their motivation to remain in the partnership.  
12 10

13 11 The key challenges encountered during implementation were to maintain the momentum as  
14 12 the partnership evolved, and to ensure joint ownership of decisions and collective  
15 13 responsibility for the direction and activities of the partnership. The NTP's and other  
16 14 partners' commitment and nurturing of an atmosphere where all stakeholders could feel  
17 15 involved in the partnership were critical to overcoming these challenges.  
18 16

19 17 It was possible to bring the public, NGOs and private sector providers together to work  
20 18 towards achieving a common public health goal despite perceived barriers between public  
21 19 and private sector providers, initial scepticism about forming the partnership, and challenges  
22 20 during implementation of the PPP. The participatory development of the partnership and  
23 21 maintaining close linkages with the PMPs helped them to gain confidence and trust over the  
24 22 public sector services, which in turn facilitated the development of a close relationship with  
25 23 the NTP and NGO partners. However, in order to develop and sustain such a partnership,  
26 24 roles and responsibilities of participating agencies and individuals must be defined. These  
27 25 findings are consistent with the outcomes of other much smaller operational research projects  
28 26 implemented elsewhere.<sup>15,20-25</sup>  
29 27

30 28 Finally, this study demonstrated that TB control outcomes could be achieved by combining  
31 29 the diverse strengths and advantages of the public and private sectors, NGOs and a group of  
32 30 selected PMPs. High rates of case detection were attained without involving all private  
33 31 practitioners in the area, thus making the PPP technically attractive to national programmes in  
34 32 other countries in terms of feasibility of implementation and wider scale up.  
35 33

### 34 Acknowledgements

35 35 We thank the patients, PMPs, and NGOs involved in this study, and the Bangladesh NTP for  
36 36 permission to carry out the study. We also thank an anonymous professional colleague who  
37 37 reviewed the revised manuscript.  
38 38

39 39 **Funding:** This study was funded by the Department for International Development (DFID)  
40 40 of the United Kingdom through the COMDIS research programme consortium; however,  
41 41 DFID does not take any responsibility for any information provided or views expressed.  
42 42

43 43 **Conflicts of interest:** none declared.  
44 44

45 45 **Authors contributions:** ZU conceived and designed the study, led the data collection and  
46 46 analysis, and preparation of the manuscript; RH participated in the data analysis and in the  
47 47 preparation of the manuscript; AH participated in data collection and analysis; SA  
48 48 coordinated the study implementation and data collection; AI participated in data collection;  
49 49 JNN participated in the design of the study, advised on data collection and analysis and  
50 50 participated in the preparation of the manuscript.

51  
52  
53  
54  
55  
56  
57  
58  
59  
60  
*Zafar Ullah*

## References

1. World Health Organisation. *Global Tuberculosis Control: World Health Organisation Report 2011*; Geneva: World Health Organisation.
2. World Health Organisation. *Tuberculosis Factsheet 2002*; Factsheet Number 104, Revised August 2002; Geneva: World Health Organisation.
3. Grange JM, Zumla A. The global emergency of tuberculosis: What is the cause? *J R Soc Health*, 2002; **122**: 78–81.
4. Benatar S, Brock G. *Global Health and Global Health Ethics*; Cambridge, United Kingdom: Cambridge University Press, 2011
5. Guda DR, Khandaker IU, Parveen SD, and Whitson T. *Bangladesh: NGO and Public Sector Tuberculosis Service Delivery—Rapid Assessment Results*; Published for the United States Agency for International Development by the Quality Assurance Project; December 2004.
6. World Health Organisation. *Tuberculosis and Health Sector Reforms in Bangladesh – A Concept Paper*, 2004. New Delhi: World Health Organisation, Regional Office for South-East Asia.
7. The National Tuberculosis Control Programme (NTP). *Annual report 2007* Dhaka: Government of Bangladesh.
8. Barkat A, Maksud AKM. *Private Sector Health Services in Bangladesh: An Exploratory Study*, prepared for Engender Health, Dhaka, 2003.
9. UNICEF. *Public-private partnership in the social sector- part two: country experiences, 1999*: 219–291; Dhaka: UNICEF Bangladesh.
10. Zafar Ullah AN, Lubben M, Newell JN. A model for effective involvement of private medical practitioners in TB care. *International Journal of Health Planning and Management*, 2004, **19** (3): 227–245.
11. World Bank. *Comparative Advantages of Public and Private Health Care Providers in Bangladesh; Bangladesh Development Series Paper No. 4, 2005*; South Asia Human Development Unit, Dhaka: The World Bank Office.
12. Zafar Ullah AN, Huque R, Begum V, Newell JN, Gerein N. Public-private partnership for TB control in Bangladesh: role of private medical practitioners in the management of TB patients. *World Medical & Health Policy*, 2010; **2** (1), Article 13.
13. Uplekar MW, Juvekar SK, Monarkar S, Rangan S, Nunn P. Tuberculosis patients and practitioners in private clinics in India, *Int J Tuberc Lung Dis*, 1998; **2**: 324–9.
14. World Health Organisation. *Involving private medical practitioners in TB and STI control, 2001*. New Delhi: World Health Organisation.
15. Newell JN, Pande SB, Baral SC, Bam DS, Malla P. Control of Tuberculosis in an urban setting in Nepal: public-private partnership. *Bull World Health Organ*, 2004; **82**: 92–98.
16. Walley J, Graham K, Wei X, Kain K, Weston R. Getting research into practice: primary care management of noncommunicable diseases in low-and middle income countries, *Bull World Health Organ*, 2012; 90:402.
17. Zachariah R, Harries AD, Ishikawa N, Rieder HL, Bissell K, Laserson K, Massaquoi M, Van Herp M, Reid T. Operational research in low-income countries: what, why, and how? *Lancet Infectious Disease*, 2009; **9**, 711–717.
18. Johnson RB, Onwuegbuzie AJ. Mixed methods research: A research paradigm whose time has come. *Educational Researcher*, 2004; **33**, 14–26.
19. Patton MQ. *Qualitative Research & Evaluation Methods*; 3<sup>rd</sup> Eds. London: Sage Publications, 2002.

- 1  
2  
3 1 20. Newell JN, Pande SB, Baral SC, Bam DS, Malla P. Leadership, management and  
4 2 technical lessons learnt from a successful public-private partnership for TB control in  
5 3 Nepal, *Int J Tuberc Lung Dis*, 2005; **9**(9):1013–1017.  
6 4  
7 4 21. Porter JD, Ogden JA, Rao PV, Rao VP, Rajesh D, Buskade RA, Soutar D.  
8 5 Introducing operations research into management and policy practices of a non-  
9 6 governmental organization (NGO): a partnership between an Indian leprosy NGO and  
10 7 an international academic institution. *Health Policy Plan*; 2004; **19**(2): 80–87.  
11 8  
12 9 22. Rangan S. The Public-Private Mix in India's Revised National Tuberculosis Control  
13 10 Programme: An Update, *J Indian Med Assoc*. 2003;**101**(3): 161–163.  
14 11  
15 12 23. Rangan S, Rasalpurkar SB, Morankar SN, Joshi AN, Porter JDH. Tuberculosis  
16 13 control in rural India: lessons from public- private collaboration, *Int J Tuberc Lung*  
17 14 *Dis*, 2004; **8**: 552.  
18 15  
19 16 24. Dewan P, Lal SS, Lonroth K, Wares F, Uplekar M, Sahu S, Granich R, Chauhan LS.  
20 17 Improving Tuberculosis Control through Public-Private Collaboration in India:  
21 18 Literature Review; *BMJ* 2006; **332**: 574–578.  
22 19  
23 16 25. Dreesch N, Nyoni J, Mokopakgosi O, Seipone K, Kalilani JA, Kaluwa O, Musowe V.  
24 17 Public-private options for expanding access to human resources for HIV/AIDS in  
25 18 Botswana; *Human Resources for Health*, 2007;**5**: 25.  
26 19  
27  
28  
29  
30  
31  
32  
33  
34  
35  
36  
37  
38  
39  
40  
41  
42  
43  
44  
45  
46  
47  
48  
49  
50  
51  
52  
53  
54  
55  
56  
57  
58  
59  
60

**Title**

Involving the Private Medical Sector in TB Control in Bangladesh: a mixed method study

**Article Focus**

- To assess the effectiveness of a Public-Private Partnership (PPP) model to involve private medical sector in TB control
- To ascertain whether scaling up of the PPP model approach to engage PMPs is feasible and has an effect on case notification rate.

**Key messages**

- This study demonstrated the feasibility and effectiveness of providing TB care through involving private sector health care providers
- The PPP substantially improved access to and quality of TB care in urban settings, as evidenced by increased TB case notification rate and increased treatment success rate.
- Our results show that it is feasible to scale up a public-private partnership within the national TB control programme.

**Strengths and Limitations**

- As TB continues to be a major threat to public health in low- and middle-income countries, and is re-emerging as an issue for concern in high-income countries, the findings of this study provide evidence for national and international scale-up of such partnerships
- By using both quantitative and qualitative methods, this study has permitted more in-depth analysis of the effectiveness of this PPP model
- From the beginning, the study was guided by a vision of nation-wide scale up.



1  
2  
3  
4 Date: 21 September 2012  
5  
6

7 Dear Editors,  
8 The BMJ Open  
9

10 Dear Madam/sir,  
11

12  
13 Thank you for considering our paper entitled "Involving the Private Medical Sector in  
14 TB Control in Bangladesh: a mixed method study". Also, thanks to the reviewers for  
15 their comments and advice. We have revised the manuscript based on these  
16 comments and suggestions. The revised sections/texts are highlighted in the  
17 manuscript.  
18  
19

20  
21 TB continues to be a major threat to public health in low- and middle-income  
22 countries, and is re-emerging as an issue for concern in high-income countries. Our  
23 paper demonstrates the feasibility and effectiveness of providing TB care through  
24 involving private sector health care providers in Bangladesh. Therefore, we believe  
25 your readership would be interested in our work on public-private partnership in TB  
26 care because of its novelty, its demonstrated effectiveness and its scope for national  
27 and international scale-up.  
28

29  
30 Thank you once again for considering our work for publication in the BMJ Open.  
31

32 Yours sincerely,  
33

34 AN Zafar Ullah and colleagues  
35  
36  
37  
38  
39  
40  
41  
42  
43  
44  
45  
46  
47  
48  
49  
50  
51  
52  
53  
54  
55  
56  
57  
58  
59  
60

**Reviewer(s)' Comments to Author:**

**Reviewer: Dr. MMH Khan**  
**Assistant Professor**  
**Department of Public Health Medicine**  
**School of Medicine**  
**Bielefeld University**  
**Germany**

Comments: TB is an important public health problem in Bangladesh and hence the topic addressed by the authors is relevant from public health point of view. In this paper, the authors mainly attempted to report the impact of Public-Private Partnership (PPP) in reporting TB suspects and cases in four areas of Dhaka city. Frankly speaking, this study has valuable information for health policymakers; however, I found several limitations of the study. Although the journal structured the review process focusing on several questions in relation to the results and conclusion, it is difficult to answer 'yes' or 'no'. Therefore I have written my comments as a text.

Response: Thank you.

Comments: The research questions or outcomes are not clearly reflected by the title of the study. It should be revised according to the main findings of the study in the abstract and introduction.

Response: The study was aimed at developing a partnership between the NTP and different elements of the private sector in Bangladesh such as Private Medical Practitioners (PMPs) and NGOs. We used both quantitative and qualitative methods (mixed methods) for the data collection of the study. We think the title reflects the study aim and methodology.

Comments: The overall study design is not clearly written. Authors mentioned many methods (as a triangulation) combining quantitative and qualitative methods. However, these methods are not adequately described. Some of the crucial things are missing. For example, authors mentioned that four areas are selected. What does the 'area' mean? Moreover, they did not mention which areas from the Dhaka city were selected for this study. Dhaka is a megacity with about 15.4 million population (not about 10 million) (see the United Nations publication (2012) "World Urbanization Prospects The 2011 Revision: Highlights") and intra-urban differences are huge in terms of socio-economic conditions, economical and commercial activities, and settlement types (i.e. slums versus non-slums). Authors should clearly report the characteristics of four areas and five DOT centre in Dhaka. Discussion regarding the representativeness of the study is also missing. Statistical methods are not discussed too.

Responses: We have revised the methods section accordingly (highlighted texts) - see page 3 and lines.6-34; and page 4 lines 15-16 and lines 18-22. We have added the following texts:

Considering the research objectives and intended outcome of a change in policy and practice, an operational research methodology<sup>16,17</sup> was thought to be appropriate. A set of criteria underpinning the broader scope of operations research was employed to make the implementation process more participative and resource-effective, and to facilitate the scale up. Specific techniques and approaches drawn from both quantitative and qualitative research methods were used to collect multiple kinds of data for the study.<sup>18,19</sup>

1  
2  
3 The study was set within the policy environment of government-NGO collaboration, enabling  
4 participation of Society for Empowerment, Education and Development (SEED) and three  
5 other NGOs – Bangladesh Rural Advancement Committee (BRAC), Progoti Samaj Kallyan  
6 Protisthan (PSKP) and Population Services Training Centre (PSTC), who were undertaking  
7 TB control activities jointly with the NTP.  
8

9  
10 Four areas of Dhaka City namely Mirpur, Rampura, Dokkhinkhan, and Kamrangirchar were  
11 selected purposively as the study sites, where the selected partner NGOs were located and  
12 had a DOTS centre; and where PMPs were major providers of health services. These study  
13 sites generally represent the geographic catchment areas of the selected NGOs covering a  
14 population of nearly one million.  
15

16 Within this partnership, SEED was the lead research partner, BRAC, PSKP and PSTC  
17 provided TB services (diagnosis, treatment and follow-up) through designated health centres  
18 whereas the NTP provided the overall policy guidelines and supported the organisation and  
19 management of the research activities. In Mirpur, PSKP provided TB services through two  
20 DOTS centres and PSTC had one DOTS centre in Rampura; whereas BRAC covered both  
21 Dokkhinkhan, and Kamrangirchar through one DOTS centre in each area. PMPs were agreed  
22 to refer the TB suspects and patients to these designated DOTS centres following the NTP  
23 guidelines. A technical committee was formed with representation from the NTP, partner  
24 NGOs and PMPs to advise on the operational issues and to support the smooth running of the  
25 partnership. A local Project Coordinator coordinated the project activities.  
26 Analysis of quantitative data was done primarily by tabulations and graphs using SPSS and  
27 Microsoft Excel programmes, and of qualitative data by thematic analysis.  
28  
29

30  
31 Ethical approvals were obtained from University of Leeds, United Kingdom and also from  
32 relevant in-country institutions including the Directorate General of Health Services, and  
33 Bangladesh National TB Control Programme. We have ensured all respondents their rights to  
34 anonymity and confidentiality. A written informed consent was obtained from each  
35 participant of the in-depth interviews and FGDs.  
36

37  
38 Comments: Results are highly summarized, although some of the results are credible. Study  
39 subjects are not adequately described. For a better understanding, results of the TB suspects  
40 and cases should be presented by sex (male versus female), age group and by area. Otherwise  
41 intra-urban differences, inequities by sex and age group will be ignored.  
42

43 Response: We were mindful to remain within the recommended word-length of the journal.  
44 In fact, the PPP project in Bangladesh yielded big dataset/findings since its inception in 2004.  
45 We recognised that this manuscript would have higher impact if we remain focused within  
46 the stated objective of the paper. We also planned to publish a series of papers based on the  
47 results/data of the PPP project. As part of this plan, we have already published two papers  
48 (Zafar Ullah *et al*, 2004 and Zafar Ullah *et al*, 2010); current manuscript is the third in the  
49 serial. The fourth one is in the drafting stage; the analyses on gender, inter-area differences  
50 will be part of that forthcoming publication. However, we are willing to incorporate the age  
51 and gender related analyses, if that is strongly felt by the editor/reviewer.  
52  
53  
54  
55  
56  
57  
58  
59  
60

1  
2  
3  
4 Comments: Results should be logically presented according to methods. In the present form,  
5 results of some methods are missing.  
6

7  
8 Response: In this paper, we have presented the results according to the project phases (e.g.  
9 pilot implementation and scale up), and outcomes of the partnership (e.g. TB control  
10 indicators). We have analysed/used data from both quantitative (service statistics from the  
11 NTP and five DOTS centres) and qualitative (in-depth interviews, FGDs and workshops)  
12 while organising and presenting the article content. Data from baseline has already been  
13 published elsewhere (see Zafar Ullah *et al.* Public-private partnership for TB control in  
14 Bangladesh: role of private medical practitioners in the management of TB patients. *World  
15 Medical & Health Policy*, 2010; **2 (1)**, Article 13, for details). As we mentioned above, some  
16 results and analysis have been kept aside for forthcoming publication(s). However, we have  
17 added two sub-headings, as suggested (see pages 5 line 18 and page 8. Line 19).  
18

19  
20 Other comments:

21  
22 Comment: Some abbreviations such as NTP (in abstract), SEED, and BRAC are not given in  
23 the first appearance.  
24

25 Response: We have revised as below (see page 3. Lines 14-16)

26 Society for Empowerment, Education and Development (SEED) and three other NGOs –  
27 Bangladesh Rural Advancement Committee (BRAC), Progoti Samaj Kallyan Protisthan  
28 (PSKP) and Population Services Training Centre (PSTC).  
29

30  
31 Comments: In the introduction, the authors have written about private healthcare. To my  
32 opinion, it is too short because private sectors include not only private medical practitioners  
33 but many other medically untrained or semi-trained providers such as people working in  
34 pharmacies/drugstores, traditional healers, homeopathic and Unnai/Ayurvedic providers. The  
35 quality of services by the private healthcare sectors is often questionable. Referring some  
36 suitable articles, authors should provide more information about private healthcare sector in  
37 Bangladesh.  
38

39 Response: We have revised the introduction section and added the following texts. We have  
40 also updated the references (see page 2 lines 24-32).  
41

42 Private healthcare is common in Bangladesh and popular amongst all, regardless of income or  
43 location. Apart from the NGOs, all other private or non-government sector health providers  
44 are generally considered to be as medically trained providers working for-profit and located  
45 outside of the government health system. The private sector also incorporates a large number  
46 of privately-managed auxiliary health services such as diagnostic laboratories, ambulance  
47 services and pharmacies/drugstores.<sup>8</sup> These private health care providers are available in  
48 abundance in urban areas.<sup>9-11</sup> However, there are countless untrained or non-qualified  
49 providers in Bangladesh who offer a combination of traditional (e.g. Unani, ayurvedic etc.)  
50 and western (allopathic) types of medicine but they are primarily found in rural areas.<sup>8</sup>  
51

52  
53 Comments: Authors mentioned in the method section that in the study areas three NGOs are  
54 working for TB case reporting and management. Two of them are not well-known like  
55 BRAC. So some descriptions are also needed for these NGOs.  
56  
57  
58  
59  
60

1  
2  
3 Response: We have revised accordingly (see page 3 lines 13-34). Also see the following  
4 additional information:  
5

6 BRAC, PSKP and PSTC are registered non-governmental organisations primarily work in the  
7 areas of health services delivery, and are among the existing collaborating partners of the  
8 NTP in implementing TB control activities.  
9

10  
11 Comments: Statements regarding ethical permission should be elaborated. Particularly what  
12 is name of the Ethical board under the Directorate General of Health Services?  
13

14 Response: We have revised as follows (see page 4 lines 15-18).

15 Ethical approvals were obtained from University of Leeds, United Kingdom and also from  
16 relevant in-country institutions including the Directorate General of Health Services, and  
17 Bangladesh National TB Control Programme. We have ensured all respondents their rights to  
18 anonymity and confidentiality. A written informed consent was obtained from each  
19 participant of the in-depth interviews and FGDs.  
20  
21  
22  
23  
24  
25  
26  
27  
28  
29  
30  
31  
32  
33  
34  
35  
36  
37  
38  
39  
40  
41  
42  
43  
44  
45  
46  
47  
48  
49  
50  
51  
52  
53  
54  
55  
56  
57  
58  
59  
60

1  
2  
3  
4  
5 **Reviewer: Dr Lal Sadasivan**

6 **Senior Specialist**

7 **Strategy, Investment and Impact Division The Global Fund to Fight AIDS,**  
8 **Tuberculosis and Malaria Switzerland**  
9

10  
11 Comment: Research question: There is no research question stated.

12  
13 Response: We have now explained the rationale and aim of the paper (see page 2 lines 39-49  
14 and page 3 lines 1-2)

15 Given the above context, the task of increasing access to and quality of TB care as well as  
16 increasing the case detection rate is enormous. To achieve this task, the NTP has recognised  
17 the need for an increased collaborative effort between the public and private health sector  
18 providers.  
19

20  
21 In this context, we conducted research to develop and evaluate a Public-Private Partnership  
22 (PPP) model to involve Private Medical Practitioners (PMPs) in the NTP's urban TB control  
23 activities, and to measure to what extent the outcomes of this partnership affect access to and  
24 quality of TB care. The development and piloting of the PPP model took place in four  
25 selected research sites in Dhaka city which spanned between 2004 and 2008. Since 2008, this  
26 PPP model has been scaled up in two other cities - Chittagong and Sylhet, in addition to  
27 scaling up in other areas of Dhaka City. This paper reports the outcomes from this  
28 development, evaluation and scale up.  
29

30  
31 Comments: PPM scale up: It is not clear where the scale up was done. In the abstract, under  
32 objectives, it is said that the scale up happened in two other bigger cities. Under objectives, it  
33 is stated that scale up happened in other areas of Dhaka and in two major cities. In the main  
34 text of the article, under introduction, it is said that PPM model was scaled up in two other  
35 big cities in addition to continued implementation in Dhaka.  
36

37  
38 Response: The PPP has been scaled up in two other cities – Chittagong and Sylhet. It was  
39 also scaled in other areas of Dhaka city after the completion of the pilot phase. We have now  
40 revised the relevant sections to make it more consistent. We added the following texts (see  
41 page 2 lines 48-49 and page 3 lines 1-2)

42 Since 2008, this PPP model has been scaled up in two other cities - Chittagong and Sylhet, in  
43 addition to scaling up in other areas of Dhaka City. This paper reports the outcomes from this  
44 development, evaluation and scale up.  
45

46  
47 Comments: Reference 1 has 2011 version. Reference 2 and 3 are old. Check for a better  
48 reference for 5.

49  
50 Response: We have updated reference 1. Reference 2 and 3 are to justify the WHO's  
51 prediction about TB deaths by 2020 which was declared in 2002.

52  
53 We have replaced the reference 5 with Guda DR, Khandaker IU, Parveen SD, and Whitson T.  
54 *Bangladesh: NGO and Public Sector Tuberculosis Service Delivery—Rapid Assessment*  
55 *Results*; Published for the United States Agency for International Development by the Quality  
56 Assurance Project; December 2004.  
57  
58  
59  
60

1  
2  
3 Comment: Page 2: line 18: it can not be 'appropriately trained' which is a positive thing.  
4

5 Response: We have now revised the sentence, as below (see page 2 lines 12-14)

6 However, major obstacles to implementation remains primarily due to insufficient  
7 infrastructure and shortage of appropriately trained health personnel.<sup>6,7</sup>  
8

9  
10 Comment: Line 51: What is SEED?

11 Response: We have provided the full name of SEED as below (see page 3 line 14)

12 Society for Empowerment, Education and Development (SEED)  
13  
14

15 Comment: Table 2: From 2007 to 2008, there is a decline in SS+ cases in the non-PPM sector  
16 while the PPM cases go up steadily. This is not explained. Did the PPM start getting the cases  
17 that would have later gone to the public sector? This may actually avoid diagnostic delays.  
18 Same question about figure 3.  
19

20  
21 Response: We tend to agree with the reviewer's explanation but we did not have enough  
22 evidence to claim that. We can confirm that there were no changes in the project  
23 implementation in 2007 and 2008. There are several hypotheses (epidemiological and  
24 programmatic) for this decrease in the case notification rate. The strongest epidemiological  
25 argument is that there might be reduction of number of TB cases in the PPP areas due to  
26 successful implementation of the PPP. However, we think it is too early to confirm this  
27 hypothesis - we have to observe the trend for much longer period to claim that.  
28

29  
30 Comment: Table 2 and 4: There is higher positivity rate among the suspects referred by the  
31 PPM (23%) compared to non-PPM (16%). Is it because of a different criteria for referral or  
32 due to stricter selection?  
33

34 Response: Our PMPs have used the NTP guidelines (WHO recommended) for indentifying  
35 TB suspects. They used a referral form developed by the PPP project. Sputum microscopy  
36 was done by the NGO-run DOTS centres involved in this project. There was no Table 4 in  
37 our manuscript.  
38

39  
40 Comment: Figure 1: decline in case notification from 2007 to 2008 in PPP is not explained.  
41

42 Response: We can confirm that there were no changes in the project implementation in 2007  
43 and 2008. There are several hypotheses (epidemiological and programmatic) for this decrease  
44 in the case notification rate. The strongest epidemiological argument is that there might be  
45 reduction of number of TB cases in the PPP areas due to successful implementation of the  
46 PPP. However, we think it is too early to confirm this hypothesis - we have to observe the  
47 trend for much longer period to claim that.  
48

49  
50 Comment: Page 8: line 45: Discussion: What is the evidence to say that the access and quality  
51 of care has improved?  
52

53 Response: We have included the following text (see page 9 lines 43-46)

54 The PPP model was highly effective in improving access to and quality of TB care in urban  
55 settings, as evidenced by a steady increase in case notification since implementation of the  
56 partnership, exceeding internationally agreed targets, and consistently maintained much  
57 higher rates than the national average.  
58  
59  
60

1  
2  
3  
4 Comment: Discussion is weak and is mostly repetition of some findings. It brings in new  
5 findings also. Needs to be rewritten to clearly convey the message.  
6

7  
8 Response: We have substantially revised the discussion section (see highlighted texts in page  
9 lines 43-49; and page 10 lines 1-26)

10  
11 Comment: This article has a good scope because it comes from a well quoted PPM site.  
12 However, it needs a careful rewriting.  
13

14 Response: Thank you. We have now updated the information and substantially revised the  
15 manuscript, as suggested.  
16

17 Comment: Please also note some points below.

- 18 • It is not clearly stated what is meant by referral by PPM.
- 19 • Please say why there is no information in figure 3 for the years beyond 2008?
- 20 • Why treatment outcomes are not reported?
- 21 • Page 8: lines 14 and 53: Using terms like 'commercial interests' and 'harmful care' can  
22 be objectionable  
23  
24

25 Response:  
26

- 27 • Referral within PPP means sending TB suspects and/or TB patients by the selected  
28 PMPs to the designated DOTS centre for diagnosis and/or treatment. The PPP project  
29 has developed a systematic approach (and a referral form) for the referral system. We  
30 have explained this in the methods section (see page 3 lines 25-34).
- 31 • Figure 3 represents data from the pilot phase only which spanned from 2004 to 2008.  
32 Data beyond 2008 are presented under "scale up section".
- 33 • The rationale for this PPP project was to increase case detection rate which was low at  
34 the start of the project, and therefore we considered the case notification and referral  
35 as the key outcome indicators to demonstrate PPP success. The treatment outcomes  
36 within the national TB control programme in Bangladesh are mostly near or above the  
37 WHO targets throughout the PPP period. Nevertheless, the treatment outcomes in the  
38 PPP areas have been consistently higher than the national average.
- 39 • We have removed the term 'harmful care', and added 'professional and' before the  
40 term 'commercial interests', as suggested (see page 9 line 13).  
41  
42  
43  
44  
45  
46  
47  
48  
49  
50  
51  
52  
53  
54  
55  
56  
57  
58  
59  
60



**Title**

Involving the Private Medical Sector in TB Control in Bangladesh: a mixed method study

**Article Focus**

- To assess the effectiveness of a Public-Private Partnership (PPP) model to involve private medical sector in TB control
- To ascertain whether scaling up of the PPP model approach to engage PMPs is feasible and has an effect on case notification rate.

**Key messages**

- This study demonstrated the feasibility and effectiveness of providing TB care through involving private sector health care providers
- The PPP substantially improved access to and quality of TB care in urban settings, as evidenced by increased TB case notification rate and increased treatment success rate.
- Our results show that it is feasible to scale up a public-private partnership within the national TB control programme.

**Strengths and Limitations**

- As TB continues to be a major threat to public health in low- and middle-income countries, and is re-emerging as an issue for concern in high-income countries, the findings of this study provide evidence for national and international scale-up of such partnerships
- By using both quantitative and qualitative methods, this study has permitted more in-depth analysis of the effectiveness of this PPP model
- From the beginning, the study was guided by a vision of nation-wide scale up.



**Effectiveness of involving private medical sectors in the National TB Control Programme in Bangladesh: evidence from mixed methods**

|                                 |                                                                                                                                                                                                                                                                                                                                                                       |
|---------------------------------|-----------------------------------------------------------------------------------------------------------------------------------------------------------------------------------------------------------------------------------------------------------------------------------------------------------------------------------------------------------------------|
| Journal:                        | <i>BMJ Open</i>                                                                                                                                                                                                                                                                                                                                                       |
| Manuscript ID:                  | bmjopen-2012-001534.R2                                                                                                                                                                                                                                                                                                                                                |
| Article Type:                   | Research                                                                                                                                                                                                                                                                                                                                                              |
| Date Submitted by the Author:   | 01-Nov-2012                                                                                                                                                                                                                                                                                                                                                           |
| Complete List of Authors:       | Zafar Ullah, Abu; University of Leeds, Leeds Institute of Health Sciences<br>Huque, Rumana; Dhaka University, Economics<br>Husain, Ashaque; National TB Control Programme, Bangladesh,<br>Akter, Salma; Society for Empowerment, Education and Development (SEED),<br>Islam, Akramul; BRAC,<br>Newell, James; University of Leeds, Leeds Institute of Health Sciences |
| <b>Primary Subject Heading</b>: | Public health                                                                                                                                                                                                                                                                                                                                                         |
| Secondary Subject Heading:      | Health policy, Health services research, Infectious diseases, Evidence based practice, Respiratory medicine                                                                                                                                                                                                                                                           |
| Keywords:                       | Public health < INFECTIOUS DISEASES, Tuberculosis < INFECTIOUS DISEASES, PUBLIC HEALTH, Health policy < HEALTH SERVICES ADMINISTRATION & MANAGEMENT                                                                                                                                                                                                                   |
|                                 |                                                                                                                                                                                                                                                                                                                                                                       |

SCHOLARONE™  
Manuscripts

only

# Effectiveness of involving private medical sectors in the National TB Control Programme in Bangladesh: evidence from mixed methods

Authors: Zafar Ullah A N<sup>1</sup>; Huque R<sup>2</sup>; Husain A<sup>3</sup>; Akter S<sup>4</sup>; Islam A<sup>5</sup>; Newell J N<sup>1</sup>

## ARTICLE SUMMARY

### Article Focus

- To assess the effectiveness of a Public-Private Partnership (PPP) model to involve private medical sector in TB control
- To ascertain whether scaling up of the PPP model approach to engage PMPs is feasible and has an effect on case notification rate.

### Key messages

- This study demonstrated the feasibility and effectiveness of providing TB care through involving private sector health care providers
- The PPP substantially improved access to and quality of TB care in urban settings, as evidenced by increased TB case notification rate and increased treatment success rate.
- Our results show that it is feasible to scale up a public-private partnership within the national TB control programme.

### Strengths and Limitations

- As TB continues to be a major threat to public health in low- and middle-income countries, and is re-emerging as an issue for concern in high-income countries, the findings of this study provide evidence for national and international scale-up of such partnerships
- By using both quantitative and qualitative methods, this study has permitted more in-depth analysis of the effectiveness of this PPP model
- From the beginning, the study was guided by a vision of nation-wide scale up.

### Abstract

**Objectives:** In Bangladesh, private health care is common and popular, regardless of income or area of residence, making the private sector an important player in health service provision. Although the private sector offers a good range of health services, tuberculosis (TB) care in the private sector is poor. We conducted research in Dhaka between 2004 and 2008 to develop and evaluate a Public-Private Partnership (PPP) model to involve Private Medical Practitioners (PMPs) within the National TB Control Programme (NTP)'s activities. Since 2008, this PPP model has been scaled up in two other big cities – Chittagong and Sylhet. This paper reports the results of this development, evaluation and scale up.

<sup>1</sup> Nuffield Centre for International Health and Development, Leeds Institute of Health Sciences, University of Leeds, United Kingdom. Correspondence should be sent to Dr. Zafar Ullah at this address ([hss1anuz@leeds.ac.uk](mailto:hss1anuz@leeds.ac.uk))

<sup>2</sup> Department of Economics, University of Dhaka, Bangladesh

<sup>3</sup> National Tuberculosis Control Programme, Bangladesh

<sup>4</sup> Society for Empowerment, Education and Development (SEED), Bangladesh

<sup>5</sup> Associate Director, BRAC Health Programme, Bangladesh

Zafar Ullah

1 **Design:** Mixed method, observational study design. We used NTP service statistics to  
2 compare the TB control outcomes between intervention and control areas. To capture detailed  
3 insights of PMPs and TB managers about the process and outcomes of the study, we  
4 conducted in-depth interviews, focus group discussions, and workshops.

5 **Setting:** Urban setting – piloted in four areas in Dhaka city; later scaled up in other areas of  
6 Dhaka and in two major cities.

7 **Findings:** The partnership with PMPs yielded significantly increased case finding of sputum  
8 smear positive TB cases. Between 2004 and 2010, 703 participating PMPs referred 3,959  
9 sputum smear positive TB cases to the designated DOTS centres – contributing about 36% of  
10 all TB cases in the project areas. There was a steady increase in case notification rates in the  
11 project areas following implementation of the partnership.

12 **Conclusions:** The PPP model was highly effective in improving access and quality of TB  
13 care in urban settings.  
14

## Introduction

Despite the availability of effective treatment, the ability to control tuberculosis (TB) remains uncertain. Current estimates suggest that globally there are over 8.8 million new TB cases, and nearly 1.5 million people die from TB, yearly: 98% of these cases and deaths occur in developing countries.<sup>1</sup> The World Health Organisation (WHO) predicts that 36 million people will die of TB between 2002 and 2020 if control measures do not improve.<sup>2-4</sup> Bangladesh is among the top ten high TB burden countries; for all forms of TB, the prevalence is 411 per 100,000 and the incidence is 225 per 100,000 populations per year.<sup>1</sup> To reduce this burden, the National TB Control Programme (NTP) has adopted the DOTS strategy, delivered primarily through government-run health facilities.<sup>5</sup> However, major obstacles to implementation remain, primarily due to insufficient infrastructure and shortage of appropriately trained health personnel.<sup>6,7</sup> These limitations mean many people with the signs and symptoms of TB must travel considerable distances to obtain TB care, have lengthy waits to be seen when they arrive, and may not be dealt with appropriately. Health facility opening times that are inconvenient for working people also limit access to and acceptability of Direct Observation of Treatment (DOT), a central component of DOTS. Furthermore, there is considerable stigma associated with TB, both in its own right and because of its association with HIV/AIDS. These factors combine to limit patients' desire and ability to seek early diagnosis and treatment from public services. Consequently, large numbers of people with chest symptoms initially seek care from private health care providers.

Private healthcare is common in Bangladesh and popular amongst all, regardless of income or location. Private sector health providers are generally medically trained providers working for-profit and located outside of the government health system. The private sector also incorporates a large number of privately-managed auxiliary health services such as diagnostic laboratories, ambulance services and pharmacies/drugstores.<sup>8</sup> These private health care providers are available in abundance in urban areas.<sup>9-11</sup> There are countless untrained or non-qualified providers in Bangladesh who offer a combination of traditional (e.g. Unani, ayurvedic etc.) and western (allopathic) types of medicine but they are primarily found in rural areas.<sup>8</sup> Although the private sector offers a range of good quality health services, as in many other countries, the care they provide for TB is poor with over-reliance on radiology (e.g. X-ray) for diagnosis, use of inappropriate treatment regimens, and poor case holding, leading to incomplete treatment and potentially to multi-drug resistant TB (MDR-TB).<sup>12-15</sup> Moreover, non-existent linkages with the public sector means TB cases managed by private sector providers are neither recorded nor reported, so that routine cohort reporting is impossible, and outcomes are not consolidated into national data. Given this context, the task of increasing access to and quality of TB care as well as increasing the case detection rate is enormous. To achieve this task, the NTP has identified the need for collaboration between the public and private health sector providers.

In this context, we conducted research to develop and evaluate a Public-Private Partnership (PPP) model to involve Private Medical Practitioners (PMPs) in the NTP's urban TB control activities, and to measure to what extent the outcomes of this partnership affect access to and quality of TB care. The development and piloting of the PPP model took place in four selected research sites in Dhaka city during the period 2004 and 2008. Since 2008, this PPP model has been scaled up in two other cities - Chittagong and Sylhet, in addition to scaling up in other areas of Dhaka City. This paper reports the outcomes from this development, evaluation and scale up.

Zafar Ullah

## Methods

Considering the research objectives and intended outcome of a change in policy and practice, an operational research methodology was thought to be appropriate based on a set of criteria underpinning the broader scope of operations research.<sup>16,17</sup> This approach was employed to make the implementation process more participative and resource-effective, and to facilitate scale up. Specific techniques and approaches drawn from both quantitative and qualitative research methods were used to collect multiple kinds of data for the study.<sup>18,19</sup>

The study was set within the policy environment of a government-NGO collaboration, enabling participation of the Society for Empowerment, Education and Development (SEED) and three other NGOs – Bangladesh Rural Advancement Committee (BRAC), Progoti Samaj Kallyan Protisthan (PSKP) and Population Services Training Centre (PSTC), which were undertaking TB control activities jointly with the NTP.

Four areas of Dhaka City - Mirpur, Rampura, Dokkhinkhan, and Kamrangirchar - were selected as study sites. Selection was purposeful, based on where the selected partner NGOs were located and had a DOTS centre; and where PMPs were major providers of health services. These study sites generally represent the geographic catchment areas of the selected NGOs covering a population of nearly one million.

Within this partnership, SEED was the lead research partner; BRAC, PSKP and PSTC provided TB services (diagnosis, treatment and follow-up) through designated health centres, and the NTP provided overall policy guidelines and supported the organisation and management of the research activities. In Mirpur, PSKP provided TB services through two DOTS centres and PSTC had one DOTS centre in Rampura; whereas BRAC covered both Dokkhinkhan, and Kamrangirchar through one DOTS centre in each area. PMPs agreed to refer the TB suspects and patients to these designated DOTS centres following the NTP guidelines. A technical committee was formed with representation from the NTP, partner NGOs and PMPs to advise on the operational issues and to support the smooth running of the partnership. A local Project Coordinator coordinated the project activities.

We developed and implemented the PPP model in three phases:

- Preparation phase
  - Formation of a Technical Working Group Committee (TWGC)
  - Collection of pre-intervention baseline data
  - Identification of tasks/service components within the partnership, based on partners' diverse strengths.
- Intervention phase
  - Strengthening DOTS centres to provide the PPP service components
  - Orientation and training of PMPs on NTP guidelines/protocols
  - Adaptation of TB forms and registers to incorporate PPP components
  - Development of diagnostic, referral and treatment protocols and linkages
  - Development and organisation of Advocacy, Communication and Social Mobilisation (ACSM) initiatives involving all stakeholders
  - Monitoring and supervision of the partnership activities
  - Evaluation of pilot phase.
- Scale up phase
  - Identification and orientation of new partners

Zafar Ullah

- Scale up.

To evaluate the PPP, we compared TB outcomes in the intervention and control (non-PPP) areas using service statistics from the NTP and the five NGO DOTS centres involved in this project. We also collected additional baseline data from the selected PMPs (see Zafar Ullah *et al* 2010 for details), and used in-depth interviews, focus group discussions (FGDs) and workshops to capture PMPs' and TB managers' insights of the process and outcomes of the study (Table 1).

*Table 1: evaluation methods, participants, tools and focus*

| Phase       | Method (n)                 | Participants (n)                                         | Tools                             | Focus                   |
|-------------|----------------------------|----------------------------------------------------------|-----------------------------------|-------------------------|
| Preparation | • Survey (1)               | • PMPs (60)                                              | • Semi-structured questionnaire   | • Process               |
|             | • In-depth interviews (42) | • NTP managers (12)<br>• NGO managers (6)<br>• PMPs (24) | • Semi-structured questionnaire   | • Process<br>• Outcomes |
|             | • FGDs (4)                 | • PMPs (24)                                              | • FGD guidelines                  | • Process               |
| Evaluation  | • Workshops (2)            | • PMPs (60: 30 per workshop)                             | • Agenda<br>• Workshop guidelines | • Process<br>• Outcomes |
|             | • Follow-up interviews     | • PMPs (12)                                              | • Semi-structured questionnaire   | • Process<br>• Outcomes |

Analysis of quantitative data was primarily by tabulation and graphs, and of qualitative data by thematic analysis.

Ethical approval was obtained from University of Leeds, United Kingdom and also from relevant in-country institutions including the Directorate General of Health Services, and Bangladesh National TB Control Programme. All personal data has been anonymised and has remained confidential. A written informed consent was obtained from each participant of the in-depth interviews and FGDs.

## Findings

### Pilot Implementation (2004-2008)

At inception in 2004, the PPP included 97 PMPs but by the end of 2009 this had risen to 703. There was continuous enrolment of PMPs: although numbers fluctuated due to retirement and relocation, no PMPs chose to leave the PPP for any other reasons. The male:female ratio was 6:1, reflecting the ratio amongst urban private health service providers.

All 703 PMPs were trained to provide quality TB care. As PMPs made it clear they were unwilling to set aside more than two days for training, we tailor-made a two-day training module (based on a training needs assessment) that included technical aspects of TB care, operational aspects of the PPP, and TB record-keeping.

We used a participatory approach involving all stakeholders including PMPs to develop and revise the tools and forms. National recording and reporting forms and registers were revised to incorporate PPP elements, and to maintain records of the referrals from PMPs. These were field-tested and reviewed before use. We revised the NTP's TB treatment algorithm to

Zafar Ullah

1 incorporate a flexible referral mechanism, which allowed the DOTS centres to refer TB  
 2 suspects/patients back to their respective PMPs, if the PMPs wished. We also used a  
 3 participatory approach to develop ACSM materials, which were made context-specific using  
 4 baseline survey data. These advocacy activities had a major role in influencing policy makers  
 5 to endorse the PPP model for country-wide scale-up.

6  
 7 PMPs initially expected financial support from the NTP as a partnership component. This  
 8 expectation was discussed with all stakeholders and it was agreed that any financial incentive  
 9 would jeopardise the partnership and could prove unsustainable in the long run. At the  
 10 beginning of the partnership, PMPs also expressed a lack of confidence about the quality of  
 11 public sector TB services, especially of diagnosis using sputum microscopy and the NTP-  
 12 recommended treatment regimen. This study addressed these issues through joint  
 13 development and monitoring of partnership activities and strong advocacy and  
 14 communication campaigns.

### 15 16 Quantitative findings

17  
 18 Within the project period (2004-2008), a total of 3,585 sputum smear positive (SS+) TB  
 19 patients were registered in the five DOTS centres in the project areas; of these 647 were  
 20 referred by PMPs. Numbers referred rose progressively over the period (Table 2).

21  
 22 *Table 2: SS+ TB cases registered in the PPP areas*

|                                     | 2004 | 2005 | 2006 | 2007 | 2008 | Total       |
|-------------------------------------|------|------|------|------|------|-------------|
| Total SS+ TB cases in the PPP areas | 533  | 673  | 800  | 830  | 749  | <b>3585</b> |
| Total SS+ TB cases referred by PMPs | 11   | 54   | 143  | 164  | 275  | <b>647</b>  |
| PMPs' contribution (%)              | 2    | 8    | 18   | 20   | 37   | <b>18</b>   |

23  
 24  
 25 The case notification rate for new SS+ TB cases in the study areas increased steadily over the  
 26 project period, and was consistently higher than the national average. By 2008 the rate in the  
 27 study areas was 94/100,000 while the national rate was 73/100,000 (Figure 1). The study rate  
 28 was also consistently higher than that in Dhaka Metropolitan City, which encloses the study  
 29 sites (Figure 1).  
 30



\*Data for Dhaka Metropolitan City available only from 2005, when the NTP started reporting for Metropolitan areas.

The presence of BRAC's extensive community network influenced the total number of new SS+ cases identified in the PPP areas (Figure 2). In Dokkhinkhan and Kamrangirchar areas, the number of new SS+ TB cases was higher than Mirpur and Rampura areas where BRAC's community health workers (known as *Shasthya Sebika*) work closely with the community to identify persons with chest complaints and advise them to go for a sputum test from a designated DOTS centre.

Another noticeable impact of the PPP was a large increase in numbers of cases of extra-pulmonary TB registered over time (Figure 3).

Almost three-quarters of the reported TB cases were between 15 and 54 years of age: most male cases were detected in the 35-44 age-group, while the peak in females was observed in the 15-24 year age-group. The number of male cases was always higher than females except in children of 0-14 age group. Only one-third of new SS+ TB cases were female. This analysis reflects the national distribution and trend observed by the NTP and other collaborating NGOs (Figure 4).

1  
2  
3  
4  
5  
6  
7  
8  
9  
10  
11  
12  
13  
14  
15  
16  
17  
18  
19  
20  
21  
22  
23  
24  
25  
26  
27  
28  
29  
30  
31  
32  
33  
34  
35  
36  
37  
38  
39  
40  
41  
42  
43  
44  
45  
46  
47  
48  
49  
50  
51  
52  
53  
54  
55  
56  
57  
58  
59  
60

1  
2  
3 PMPs made a significant contribution to the numbers of TB suspects examined in the  
4 designated labs in the four PPP areas: in total 2,756 of the 24,678 TB suspects examined were  
5 referred by PMPs, with a steady rise over the study period (Figure 5).  
6  
7

### 8 **Scaling up and getting research into policy and practice (GRIPP)**

9  
10 Based on the PPP pilot results, the NTP started implementing the PPP model in other cities –  
11 Chittagong (from 2007), Sylhet (2008), and other areas of Dhaka (2009) – covering more  
12 than 15 million people. In Chittagong, five NGO partners collaborated with the NTP to  
13 support the PPP; in Sylhet, BRAC was the only NGO service provider, but two medical  
14 college hospitals were also involved. In the scale-up areas, PMPs have made a substantial  
15 contribution to the NTP's effort to control TB in Bangladesh (Figure 6 and Table 3).  
16

### 17 **Overall impact of the PPP on TB Control**

18  
19 The involvement of PMPs substantially increased case finding of SS+ TB cases, a key TB  
20 control indicator. The partnership made a significant contribution in identifying SS+ TB  
21 cases: from the inception of the PPP in 2004 until 2010, 703 participating PMPs referred  
22 almost 19,000 TB suspects and 3,959 SS+ TB cases to the designated DOTS centres (Figure  
23 7). Overall, almost 36% of all SS+ TB cases were attributable to involvement of the private  
24 sector providers (Table 3).  
25

Table 3: Total SS+TB patients in all PPP areas and PMP's contribution, 2004-2010

|                                     | Dhaka | Chittagong | Sylhet | Total        |
|-------------------------------------|-------|------------|--------|--------------|
| Total SS+ TB cases in the PPP areas | 5199  | 3748       | 2068   | <b>11015</b> |
| Total SS+ TB cases referred by PMPs | 1214  | 2028       | 717    | <b>3959</b>  |
| PMPs' contribution %                | 23    | 54         | 35     | <b>36</b>    |

### Qualitative findings

The qualitative evaluation revealed that the participatory approach of planning and designing the PPP including involvement of all stakeholders in the process of selecting service components, selecting partners, and monitoring of the PPP played a crucial part in securing commitment and ownership from all parties involved. Virtually all PMPs interviewed (96%) mentioned having a positive experience in regard to the monitoring and support mechanism of the project, which was key to the success of the project implementation, and paved the way for scale-up. Specifically, they valued the monthly field visit by the project field staff. In reply to the question: "Do you own this project?" a popular PMP spontaneously replied "Oh, yes. No doubt about it". He went on to say "I have been consulted throughout the planning process of the project, and later we have jointly implemented it. So, this is our project. I am part of it".

The quarterly review meetings were organised in rotation by the NTP and the partner NGOs either in the NTP's conference room or in one of the NGO's working locations. When asked about these arrangements, both the NTP and NGOs expressed their satisfaction and expressed their commitment to maintaining this practice in future collaborations.

All PMPs interviewed (n=24) said they had no problems using the referral and other forms. "The [TB related] registers and referral forms are quite simple and user-friendly, and easy to maintain" said a busy practitioner. The NTP managers said they were amazed by the fact that most PMPs were keeping records. The PMPs also liked the system of referral back to the referring practitioners, which preserved their professional and commercial interests. However, a few PMPs were unhappy as they felt they did not get sufficient feedback about the patients they had referred, even though feedback was regularly given to PMPs through monthly field visits and during quarterly review meetings.

The evaluation revealed major challenges in managing the PPP. It was difficult to bring such a heterogeneous group under one umbrella, especially in the early stages of the partnership process.

Another important finding was that the public, NGO and private sector providers showed strong commitment and willingness to work together to achieve the common goal of TB control, although PMPs were initially sceptical about the motive of the public sector regarding this partnership, and the public sector and NGOs were initially doubtful whether PMPs would sacrifice their time to participate in such partnerships.

In the absence of a regulatory mechanism, the PPP was primarily based on good relationships and dialogue. Both NTP and NGO respondents stated that they were sometimes overburdened with the extra work needed to implement the partnership activities. The NTP

Zafar Ullah

1 was hit harder than the partner NGOs, because there was a shortage of staff within the NTP  
2 management. Other key challenges encountered during implementation were to maintain the  
3 progress of the partnership, as it evolved, and to ensure joint ownership of decisions and  
4 collective responsibility for the direction and activities of the partnership. One senior PMP  
5 said *“Initially I thought this partnership would fail because I had serious reservations about  
6 negative attitudes of government officials. They [government officials] don’t know how to  
7 give respect to anybody other than their bosses. But after getting the chance to work with the  
8 NTP, I have now changed my mind. I have found the government officials now behave much  
9 better than they used to do in the past”*.

## 11 Discussion and conclusion

13 The PPP model was highly effective in improving access to and quality of TB care in urban  
14 settings, as evidenced by a steady increase in case notification since implementation of the  
15 partnership, exceeding internationally agreed targets, and consistently maintaining much  
16 higher rates than the national average.

18 Systematic implementation of the PPP led to greater and effective involvement of PMPs,  
19 resulting in increased access to quality TB care. However, needs-based training is necessary  
20 for PMPs to enhance their knowledge on the NTP guidelines in regard to appropriate  
21 diagnosis, treatment, and follow-up to guarantee the continuity and quality of TB care.

23 The tools, protocols and ACSM materials proved vital to facilitating the partnership. The  
24 lessons learned from this partnership formed the basis of the National PPM (Public-Private  
25 Mix) guidelines. The revised tools and guidelines considerably improved the quality of TB  
26 reporting, thus strengthening the health information available. The revised protocol for  
27 referrals gave PMPs confidence that they would not lose their patients, which greatly  
28 increased their motivation to remain in the partnership.

30 The key challenges encountered during implementation were to maintain the momentum as  
31 the partnership evolved, and to ensure joint ownership of decisions and collective  
32 responsibility for the direction and activities of the partnership. The NTP’s and other  
33 partners’ commitment and nurturing of an atmosphere where all stakeholders could feel  
34 involved in the partnership were critical to overcoming these challenges.

36 It was possible to bring the public, NGOs and private sector providers together to work  
37 towards achieving a common public health goal despite perceived barriers between public  
38 and private sector providers, initial scepticism about forming the partnership, and challenges  
39 during implementation of the PPP. The participatory development of the partnership and  
40 maintaining close linkages with the PMPs helped them to gain confidence and trust over the  
41 public sector services, which in turn facilitated the development of a close relationship with  
42 the NTP and NGO partners. However, in order to develop and sustain such a partnership,  
43 roles and responsibilities of participating agencies and individuals must be defined. These  
44 findings are consistent with the outcomes of other much smaller operational research projects  
45 implemented elsewhere.<sup>15,20–25</sup>

47 The selected study sites were drawn from urban DOTS areas in Bangladesh and the research  
48 was deliberately embedded within the NTP programme activities. The PPP service  
49 components were aligned with the NTP guidelines and were implemented through the  
50 NTP/NGO’s designated DOTS centres. The health system elements, particularly the type of

Zafar Ullah

1 health facilities, composition of health staff, and organisation of the TB control activities  
2 through government-NGO collaboration were similar in the study areas and in other urban  
3 areas of Bangladesh. Moreover, the type and characteristics of urban health care provided by  
4 private sector providers follow a similar pattern in all urban areas of the country. Therefore,  
5 the PPP can be scaled up in other urban DOTS areas providing that human and financial  
6 resources are provided for the partnership activities.

7  
8 In summary, this study demonstrated that TB control outcomes could be achieved by  
9 combining the diverse strengths and advantages of the public and private sectors, NGOs and  
10 a group of selected PMPs. High rates of case detection were attained without involving all  
11 private practitioners in the area, thus making the PPP technically attractive to national  
12 programmes in other countries in terms of feasibility of implementation and wider scale up.

13  
14 **Acknowledgements:** We thank the patients, PMPs, and NGOs involved in this study, and the  
15 Bangladesh NTP for permission to carry out the study. We also thank an anonymous  
16 professional colleague who reviewed the revised manuscript.

17  
18 **Funding:** This document is an output from a project funded by UK Aid from the UK  
19 Department for International Development (DFID) for the benefit of developing countries.  
20 However, the views expressed and information contained in it are not necessarily those of or  
21 endorsed by DFID, which can accept no responsibility for such views or information or for  
22 any reliance placed on them

23  
24 **Conflicts of interest:** none declared.

25  
26 **Authors contributions:** ZU conceived and designed the study, led the data collection and  
27 analysis, and preparation of the manuscript; RH participated in the data analysis and in the  
28 preparation of the manuscript; AH participated in data collection and analysis; SA  
29 coordinated the study implementation and data collection; AI participated in data collection;  
30 JNN participated in the design of the study, advised on data collection and analysis and  
31 participated in the preparation of the manuscript.

### 32 **Data Sharing**

33  
34 No additional data available.

### 35 **References**

- 36 1. World Health Organisation. *Global Tuberculosis Control: World Health Organisation*  
37 *Report 2011*; Geneva: World Health Organisation.
- 38 2. World Health Organisation. *Tuberculosis Factsheet 2002*; Factsheet Number 104,  
39 Revised August 2002; Geneva: World Health Organisation.
- 40 3. Grange JM, Zumla A. The global emergency of tuberculosis: What is the cause? *J R*  
41 *Soc Health*, 2002; **122**: 78–81.
- 42 4. Benatar S, Brock G. *Global Health and Global Health Ethics*; Cambridge, United  
43 Kingdom: Cambridge University Press, 2011
- 44 5. Guda DR, Khandaker IU, Parveen SD, et al: *NGO and Public Sector Tuberculosis*  
45 *Service Delivery—Rapid Assessment Results*; Published for the United States Agency  
46 for International Development by the Quality Assurance Project; December 2004.

47  
48  
49  
50  
51  
52  
53  
54  
55  
56  
57  
58  
59  
60  
Zafar Ullah

6. World Health Organisation. *Tuberculosis and Health Sector Reforms in Bangladesh – A Concept Paper*, 2004. New Delhi: World Health Organisation, Regional Office for South-East Asia.
7. The National Tuberculosis Control Programme (NTP). *Annual report 2007* Dhaka: Government of Bangladesh.
8. Barkat A, Maksud AKM. *Private Sector Health Services in Bangladesh: An Exploratory Study*, prepared for Engender Health, Dhaka, 2003.
9. UNICEF. *Public-private partnership in the social sector- part two: country experiences, 1999*: 219–291; Dhaka: UNICEF Bangladesh.
10. Zafar Ullah AN, Lubben M, Newell JN. A model for effective involvement of private medical practitioners in TB care. *International Journal of Health Planning and Management*, 2004, **19** (3): 227–245.
11. World Bank. *Comparative Advantages of Public and Private Health Care Providers in Bangladesh; Bangladesh Development Series Paper No. 4, 2005*; South Asia Human Development Unit, Dhaka: The World Bank Office.
12. Zafar Ullah AN, Huque R, Begum V, et al. Public-private partnership for TB control in Bangladesh: role of private medical practitioners in the management of TB patients. *World Medical & Health Policy*, 2010; **2** (1), Article 13.
13. Uplekar MW, Juvekar SK, Monarkar S, et al. Tuberculosis patients and practitioners in private clinics in India, *Int J Tuberc Lung Dis*, 1998; **2**: 324–9.
14. World Health Organisation. *Involving private medical practitioners in TB and STI control, 2001*. New Delhi: World Health Organisation.
15. Newell JN, Pande SB, Baral SC, et al. Control of Tuberculosis in an urban setting in Nepal: public-private partnership. *Bull World Health Organ*, 2004; **82**: 92–98.
16. Walley J, Graham K, Wei X, et al. Getting research into practice: primary care management of noncommunicable diseases in low-and middle income countries, *Bull World Health Organ*, 2012; 90:402.
17. Zachariah R, Harries AD, Ishikawa N Rieder HL, et al. Operational research in low-income countries: what, why, and how? *Lancet Infectious Disease*, 2009; **9**, 711–717.
18. Johnson RB, Onwuegbuzie AJ. Mixed methods research: A research paradigm whose time has come. *Educational Researcher*, 2004; **33**, 14–26.
19. Patton MQ. *Qualitative Research & Evaluation Methods*; 3<sup>rd</sup> Eds. London: Sage Publications, 2002.
20. Newell JN, Pande SB, Baral SC, et al. Leadership, management and technical lessons learnt from a successful public-private partnership for TB control in Nepal, *Int J Tuberc Lung Dis*, 2005; **9**(9):1013–1017.
21. Porter JD, Ogden JA, Rao PV, et al. Introducing operations research into management and policy practices of a non-governmental organization (NGO): a partnership between an Indian leprosy NGO and an international academic institution. *Health Policy Plan*; 2004; **19**(2): 80–87.
22. Rangan S. The Public-Private Mix in India's Revised National Tuberculosis Control Programme: An Update, *J Indian Med Assoc*. 2003;**101**(3): 161–163.
23. Rangan S, Rasalpurkar SB, Morankar SN, et al. Tuberculosis control in rural India: lessons from public- private collaboration, *Int J Tuberc Lung Dis*, 2004; **8**: 552.
24. Dewan P, Lal SS, Lonroth K, et al. Improving Tuberculosis Control through Public-Private Collaboration in India: Literature Review; *BMJ* 2006; **332**: 574–578.
25. Dreesch N, Nyoni J, Mokopakgosi O, et al. Public-private options for expanding access to human resources for HIV/AIDS in Botswana; *Human Resources for Health*, 2007;**5**: 25.

1  
2  
3 1 Figure Legends  
4

5 2  
6 3 *Figure 1: Case notification rates of new SS+ TB cases in Dhaka Metropolitan City\* and the PPP*  
7 4 *project areas*  
8

9 5  
10 6 *Figure 2: Area-wise case notification of SS+ TB in the PPP project areas: 2004 – 2008*  
11

12 7  
13 8 *Figure 3: Numbers of extra-pulmonary TB cases registered in the PPP DOTS Centres*  
14

15 9  
16 10 *Figure 4: Distribution of new SS+ TB cases per age group and gender in the PPP project areas*  
17

18 11  
19 12 *Figure 5: Numbers of TB suspects receiving sputum microscopy in the PPP project areas*  
20

21 13  
22 14 *Figure 6: SS+TB patients registered in PPP scale up areas and PMP's contribution, 2007-2010*  
23

24 15  
25 16 *Figure 7: Overall PMP contribution to identifying TB suspects in all PPP areas, 2004-2010*  
26  
27  
28  
29  
30  
31  
32  
33  
34  
35  
36  
37  
38  
39  
40  
41  
42  
43  
44  
45  
46  
47  
48  
49  
50  
51  
52  
53  
54  
55  
56  
57  
58  
59  
60

## Effectiveness of involving private medical sectors in the National TB Control Programme in Bangladesh: evidence from mixed methods

Authors: Zafar Ullah A N<sup>1</sup>; Huque R<sup>2</sup>; Husain A<sup>3</sup>; Akter S<sup>4</sup>; Islam A<sup>5</sup>; Newell J N<sup>1</sup>

### Abstract

**Objectives:** In Bangladesh, private health care is common and popular, regardless of income or area of residence, making the private sector an important player in health service provision. Although the private sector offers a good range of health services, tuberculosis (TB) care in the private sector is poor. We conducted research in Dhaka between 2004 and 2008 to develop and evaluate a Public-Private Partnership (PPP) model to involve Private Medical Practitioners (PMPs) within the National TB Control Programme (NTP)'s activities. Since 2008, this PPP model has been scaled up in two other big cities – Chittagong and Sylhet. This paper reports the results of this development, evaluation and scale up.

**Design:** Mixed method, observational study design. We used NTP service statistics to compare the TB control outcomes between intervention and control areas. To capture detailed insights of PMPs and TB managers about the process and outcomes of the study, we conducted in-depth interviews, focus group discussions, and workshops.

**Setting:** Urban setting – piloted in four areas in Dhaka city; later scaled up in other areas of Dhaka and in two major cities.

**Findings:** The partnership with PMPs yielded significantly increased case finding of sputum smear positive TB cases. Between 2004 and 2010, 703 participating PMPs referred 3,959 sputum smear positive TB cases to the designated DOTS centres – contributing about 36% of all TB cases in the project areas. There was a steady increase in case notification rates in the project areas following implementation of the partnership.

**Conclusions:** The PPP model was highly effective in improving access and quality of TB care in urban settings.

<sup>1</sup> Nuffield Centre for International Health and Development, Leeds Institute of Health Sciences, University of Leeds, United Kingdom. Correspondence should be sent to Dr. Zafar Ullah at this address ([hss1anuz@leeds.ac.uk](mailto:hss1anuz@leeds.ac.uk))

<sup>2</sup> Department of Economics, University of Dhaka, Bangladesh

<sup>3</sup> National Tuberculosis Control Programme, Bangladesh

<sup>4</sup> Society for Empowerment, Education and Development (SEED), Bangladesh

<sup>5</sup> Associate Director, BRAC Health Programme, Bangladesh



## Introduction

Despite the availability of effective treatment, the ability to control tuberculosis (TB) remains uncertain. Current estimates suggest that globally there are over 8.8 million new TB cases, and nearly 1.5 million people die from TB, yearly: 98% of these cases and deaths occur in developing countries.<sup>1</sup> The World Health Organisation (WHO) predicts that 36 million people will die of TB between 2002 and 2020 if control measures do not improve.<sup>2-4</sup> Bangladesh is among the top ten high TB burden countries; for all forms of TB, the prevalence is 411 per 100,000 and the incidence is 225 per 100,000 populations per year.<sup>1</sup> To reduce this burden, the National TB Control Programme (NTP) has adopted the DOTS strategy, delivered primarily through government-run health facilities.<sup>5</sup> However, major obstacles to implementation remain, primarily due to insufficient infrastructure and shortage of appropriately trained health personnel.<sup>6,7</sup> These limitations mean many people with the signs and symptoms of TB must travel considerable distances to obtain TB care, have lengthy waits to be seen when they arrive, and may not be dealt with appropriately. Health facility opening times that are inconvenient for working people also limit access to and acceptability of Direct Observation of Treatment (DOT), a central component of DOTS. Furthermore, there is considerable stigma associated with TB, both in its own right and because of its association with HIV/AIDS. These factors combine to limit patients' desire and ability to seek early diagnosis and treatment from public services. Consequently, large numbers of people with chest symptoms initially seek care from private health care providers.

Private healthcare is common in Bangladesh and popular amongst all, regardless of income or location. Private sector health providers are generally medically trained providers working for-profit and located outside of the government health system. The private sector also incorporates a large number of privately-managed auxiliary health services such as diagnostic laboratories, ambulance services and pharmacies/drugstores.<sup>8</sup> These private health care providers are available in abundance in urban areas.<sup>9-11</sup> There are countless untrained or non-qualified providers in Bangladesh who offer a combination of traditional (e.g. Unani, ayurvedic etc.) and western (allopathic) types of medicine but they are primarily found in rural areas.<sup>8</sup> Although the private sector offers a range of good quality health services, as in many other countries, the care they provide for TB is poor with over-reliance on radiology (e.g. X-ray) for diagnosis, use of inappropriate treatment regimens, and poor case holding, leading to incomplete treatment and potentially to multi-drug resistant TB (MDR-TB).<sup>12-15</sup> Moreover, non-existent linkages with the public sector means TB cases managed by private sector providers are neither recorded nor reported, so that routine cohort reporting is impossible, and outcomes are not consolidated into national data. Given this context, the task of increasing access to and quality of TB care as well as increasing the case detection rate is enormous. To achieve this task, the NTP has identified the need for collaboration between the public and private health sector providers.

In this context, we conducted research to develop and evaluate a Public-Private Partnership (PPP) model to involve Private Medical Practitioners (PMPs) in the NTP's urban TB control activities, and to measure to what extent the outcomes of this partnership affect access to and quality of TB care. The development and piloting of the PPP model took place in four selected research sites in Dhaka city during the period 2004 and 2008. Since 2008, this PPP model has been scaled up in two other cities - Chittagong and Sylhet, in addition to scaling up in other areas of Dhaka City. This paper reports the outcomes from this development, evaluation and scale up.

Zafar Ullah

## Methods

Considering the research objectives and intended outcome of a change in policy and practice, an operational research methodology was thought to be appropriate based on a set of criteria underpinning the broader scope of operations research.<sup>16,17</sup> This approach was employed to make the implementation process more participative and resource-effective, and to facilitate scale up. Specific techniques and approaches drawn from both quantitative and qualitative research methods were used to collect multiple kinds of data for the study.<sup>18,19</sup>

The study was set within the policy environment of a government-NGO collaboration, enabling participation of the Society for Empowerment, Education and Development (SEED) and three other NGOs – Bangladesh Rural Advancement Committee (BRAC), Progoti Samaj Kallyan Protisthan (PSKP) and Population Services Training Centre (PSTC), which were undertaking TB control activities jointly with the NTP.

Four areas of Dhaka City - Mirpur, Rampura, Dokkhinkhan, and Kamrangirchar - were selected as study sites. Selection was purposeful, based on where the selected partner NGOs were located and had a DOTS centre; and where PMPs were major providers of health services. These study sites generally represent the geographic catchment areas of the selected NGOs covering a population of nearly one million.

Within this partnership, SEED was the lead research partner; BRAC, PSKP and PSTC provided TB services (diagnosis, treatment and follow-up) through designated health centres, and the NTP provided overall policy guidelines and supported the organisation and management of the research activities. In Mirpur, PSKP provided TB services through two DOTS centres and PSTC had one DOTS centre in Rampura; whereas BRAC covered both Dokkhinkhan, and Kamrangirchar through one DOTS centre in each area. PMPs agreed to refer the TB suspects and patients to these designated DOTS centres following the NTP guidelines. A technical committee was formed with representation from the NTP, partner NGOs and PMPs to advise on the operational issues and to support the smooth running of the partnership. A local Project Coordinator coordinated the project activities.

We developed and implemented the PPP model in three phases:

- Preparation phase
  - Formation of a Technical Working Group Committee (TWGC)
  - Collection of pre-intervention baseline data
  - Identification of tasks/service components within the partnership, based on partners' diverse strengths.
- Intervention phase
  - Strengthening DOTS centres to provide the PPP service components
  - Orientation and training of PMPs on NTP guidelines/protocols
  - Adaptation of TB forms and registers to incorporate PPP components
  - Development of diagnostic, referral and treatment protocols and linkages
  - Development and organisation of Advocacy, Communication and Social Mobilisation (ACSM) initiatives involving all stakeholders
  - Monitoring and supervision of the partnership activities
  - Evaluation of pilot phase.
- Scale up phase
  - Identification and orientation of new partners

Zafar Ullah

- Scale up.

To evaluate the PPP, we compared TB outcomes in the intervention and control (non-PPP) areas using service statistics from the NTP and the five NGO DOTS centres involved in this project. We also collected additional baseline data from the selected PMPs (see Zafar Ullah *et al* 2010 for details), and used in-depth interviews, focus group discussions (FGDs) and workshops to capture PMPs' and TB managers' insights of the process and outcomes of the study (Table 1).

Table 1: evaluation methods, participants, tools and focus

| Phase       | Method (n)                 | Participants (n)                                         | Tools                             | Focus                   |
|-------------|----------------------------|----------------------------------------------------------|-----------------------------------|-------------------------|
| Preparation | • Survey (1)               | • PMPs (60)                                              | • Semi-structured questionnaire   | • Process               |
|             | • In-depth interviews (42) | • NTP managers (12)<br>• NGO managers (6)<br>• PMPs (24) | • Semi-structured questionnaire   | • Process<br>• Outcomes |
|             | • FGDs (4)                 | • PMPs (24)                                              | • FGD guidelines                  | • Process               |
| Evaluation  | • Workshops (2)            | • PMPs (60: 30 per workshop)                             | • Agenda<br>• Workshop guidelines | • Process<br>• Outcomes |
|             | • Follow-up interviews     | • PMPs (12)                                              | • Semi-structured questionnaire   | • Process<br>• Outcomes |

Analysis of quantitative data was primarily by tabulation and graphs, and of qualitative data by thematic analysis.

Ethical approval was obtained from University of Leeds, United Kingdom and also from relevant in-country institutions including the Directorate General of Health Services, and Bangladesh National TB Control Programme. All personal data has been anonymised and has remained confidential. A written informed consent was obtained from each participant of the in-depth interviews and FGDs.

## Findings

### Pilot Implementation (2004-2008)

At inception in 2004, the PPP included 97 PMPs but by the end of 2009 this had risen to 703. There was continuous enrolment of PMPs: although numbers fluctuated due to retirement and relocation, no PMPs chose to leave the PPP for any other reasons. The male:female ratio was 6:1, reflecting the ratio amongst urban private health service providers.

All 703 PMPs were trained to provide quality TB care. As PMPs made it clear they were unwilling to set aside more than two days for training, we tailor-made a two-day training module (based on a training needs assessment) that included technical aspects of TB care, operational aspects of the PPP, and TB record-keeping.

We used a participatory approach involving all stakeholders including PMPs to develop and revise the tools and forms. National recording and reporting forms and registers were revised to incorporate PPP elements, and to maintain records of the referrals from PMPs. These were field-tested and reviewed before use. We revised the NTP's TB treatment algorithm to

Zafar Ullah

1 incorporate a flexible referral mechanism, which allowed the DOTS centres to refer TB  
 2 suspects/patients back to their respective PMPs, if the PMPs wished. We also used a  
 3 participatory approach to develop ACSM materials, which were made context-specific using  
 4 baseline survey data. These advocacy activities had a major role in influencing policy makers  
 5 to endorse the PPP model for country-wide scale-up.

7 PMPs initially expected financial support from the NTP as a partnership component. This  
 8 expectation was discussed with all stakeholders and it was agreed that any financial incentive  
 9 would jeopardise the partnership and could prove unsustainable in the long run. At the  
 10 beginning of the partnership, PMPs also expressed a lack of confidence about the quality of  
 11 public sector TB services, especially of diagnosis using sputum microscopy and the NTP-  
 12 recommended treatment regimen. This study addressed these issues through joint  
 13 development and monitoring of partnership activities and strong advocacy and  
 14 communication campaigns.

### 16 Quantitative findings

18 Within the project period (2004-2008), a total of 3,585 sputum smear positive (SS+) TB  
 19 patients were registered in the five DOTS centres in the project areas; of these 647 were  
 20 referred by PMPs. Numbers referred rose progressively over the period (Table 2).

22 *Table 2: SS+ TB cases registered in the PPP areas*

|                                     | 2004 | 2005 | 2006 | 2007 | 2008 | Total       |
|-------------------------------------|------|------|------|------|------|-------------|
| Total SS+ TB cases in the PPP areas | 533  | 673  | 800  | 830  | 749  | <b>3585</b> |
| Total SS+ TB cases referred by PMPs | 11   | 54   | 143  | 164  | 275  | <b>647</b>  |
| PMPs' contribution (%)              | 2    | 8    | 18   | 20   | 37   | <b>18</b>   |

24 The case notification rate for new SS+ TB cases in the study areas increased steadily over the  
 25 project period, and was consistently higher than the national average. By 2008 the rate in the  
 26 study areas was 94/100,000 while the national rate was 73/100,000 (Figure 1). The study rate  
 27 was also consistently higher than that in Dhaka Metropolitan City, which encloses the study  
 28 sites (Figure 1).

Figure 1: Case notification rates of new SS+ TB cases in Dhaka Metropolitan City\* and the PPP project areas

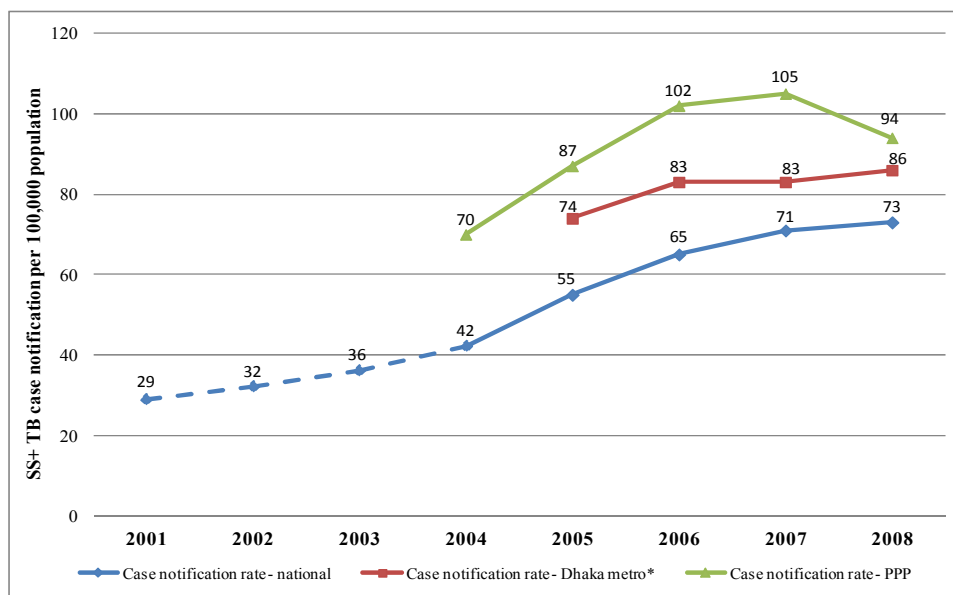

\*Data for Dhaka Metropolitan City available only from 2005, when the NTP started reporting for Metropolitan areas.

The presence of BRAC's extensive community network influenced the total number of new SS+ cases identified in the PPP areas (Figure 2). In Dokkhinkhan and Kamrangirchar areas, the number of new SS+ TB cases was higher than Mirpur and Rampura areas where BRAC's community health workers (known as *Shasthya Sebika*) work closely with the community to identify persons with chest complaints and advise them to go for a sputum test from a designated DOTS centre.

Figure 2: Area-wise case notification of SS+ TB in the PPP project areas: 2004 – 2008

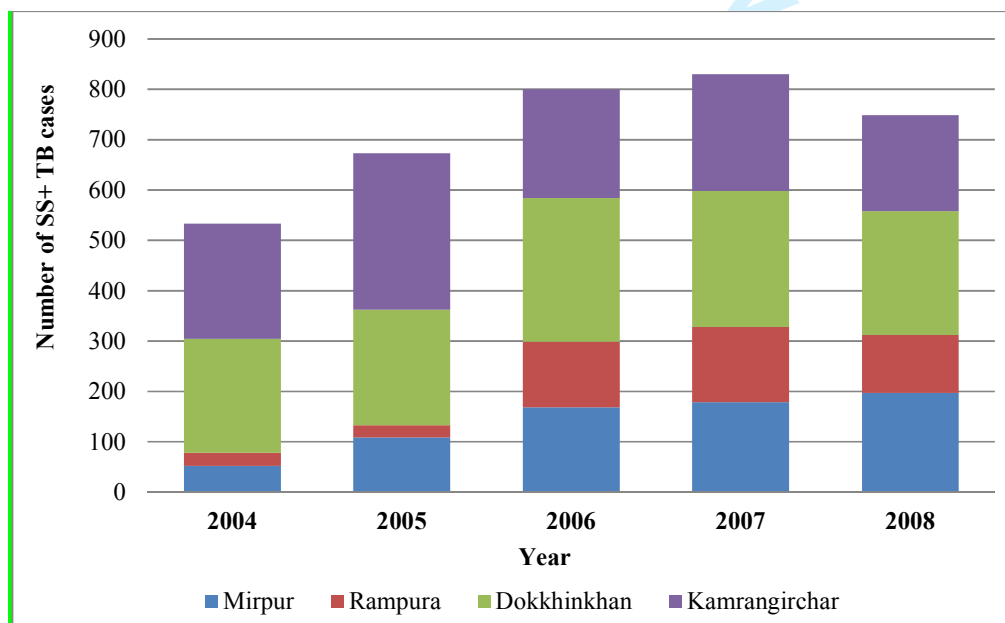

1  
2  
3  
4  
5  
6  
7  
8  
9  
10  
11  
12  
13  
14  
15  
16  
17  
18  
19  
20  
21  
22  
23  
24  
25  
26  
27  
28  
29  
30  
31  
32  
33  
34  
35  
36  
37  
38  
39  
40  
41  
42  
43  
44  
45  
46  
47  
48  
49  
50  
51  
52  
53  
54  
55  
56  
57  
58  
59  
60

1  
2 Another noticeable impact of the PPP was a large increase in numbers of cases of extra-pulmonary TB registered over time (Figure 3).

3  
4  
5 *Figure 3: Numbers of extra-pulmonary TB cases registered in the PPP DOTS Centres*

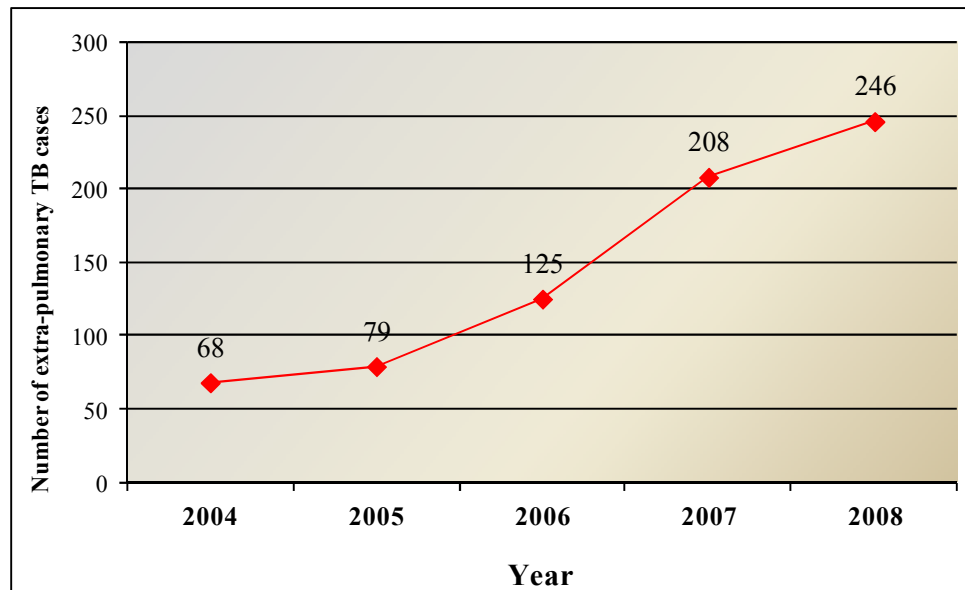

7  
8  
9 Almost three-quarters of the reported TB cases were between 15 and 54 years of age: most  
10 male cases were detected in the 35-44 age-group, while the peak in females was observed in  
11 the 15-24 year age-group. The number of male cases was always higher than females except  
12 in children of 0-14 age group. Only one-third of new SS+ TB cases were female. This  
13 analysis reflects the national distribution and trend observed by the NTP and other  
14 collaborating NGOs (Figure 4).

Figure 4: Distribution of new SS+ TB cases per age group and gender in the PPP project areas

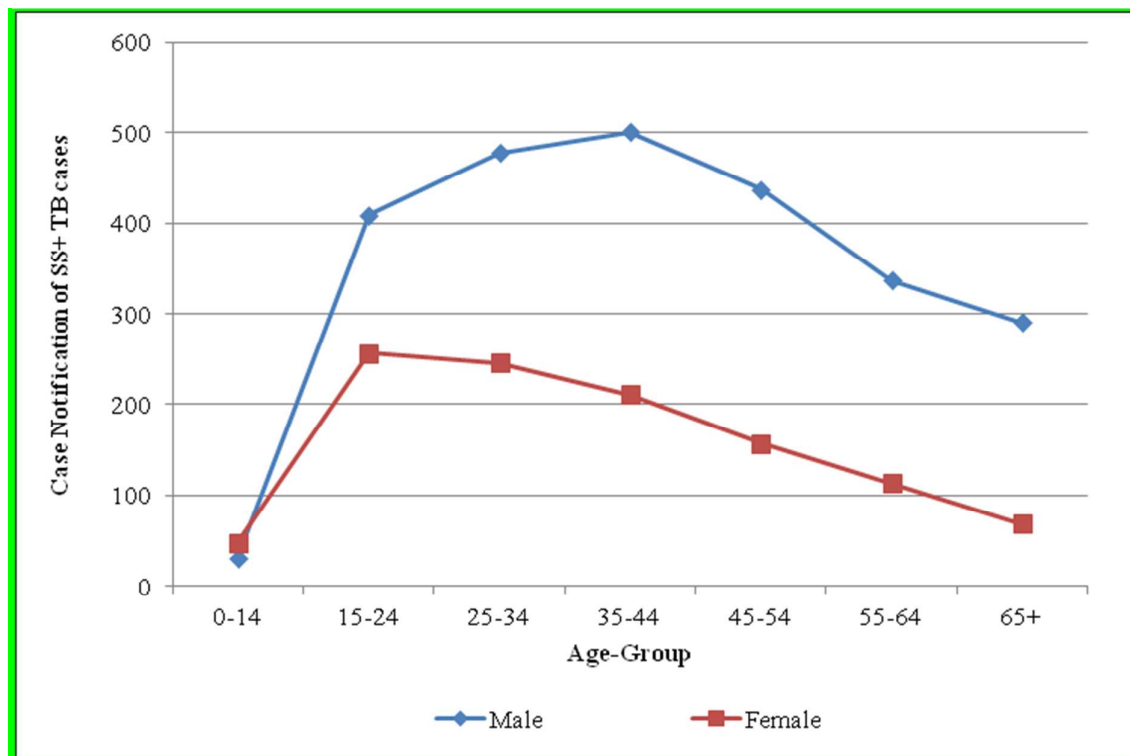

PMPs made a significant contribution to the numbers of TB suspects examined in the designated labs in the four PPP areas: in total 2,756 of the 24,678 TB suspects examined were referred by PMPs, with a steady rise over the study period (Figure 5).

Figure 5: Numbers of TB suspects receiving sputum microscopy in the PPP project areas

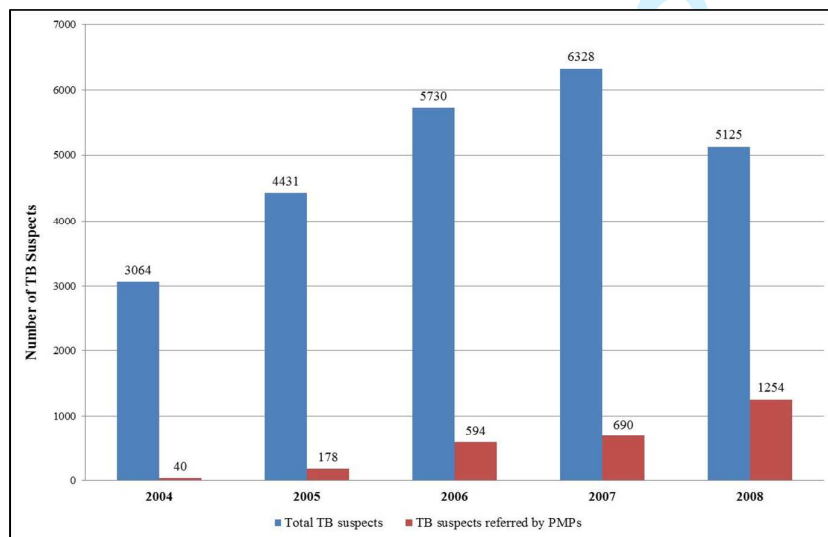

### Scaling up and getting research into policy and practice (GRIPP)

Based on the PPP pilot results, the NTP started implementing the PPP model in other cities – Chittagong (from 2007), Sylhet (2008), and other areas of Dhaka (2009) – covering more than 15 million people. In Chittagong, five NGO partners collaborated with the NTP to support the PPP; in Sylhet, BRAC was the only NGO service provider, but two medical college hospitals were also involved. In the scale-up areas, PMPs have made a substantial contribution to the NTP's effort to control TB in Bangladesh (Figure 6 and Table 3).

Figure 6: SS+TB patients registered in PPP scale up areas and PMP's contribution, 2007-2010

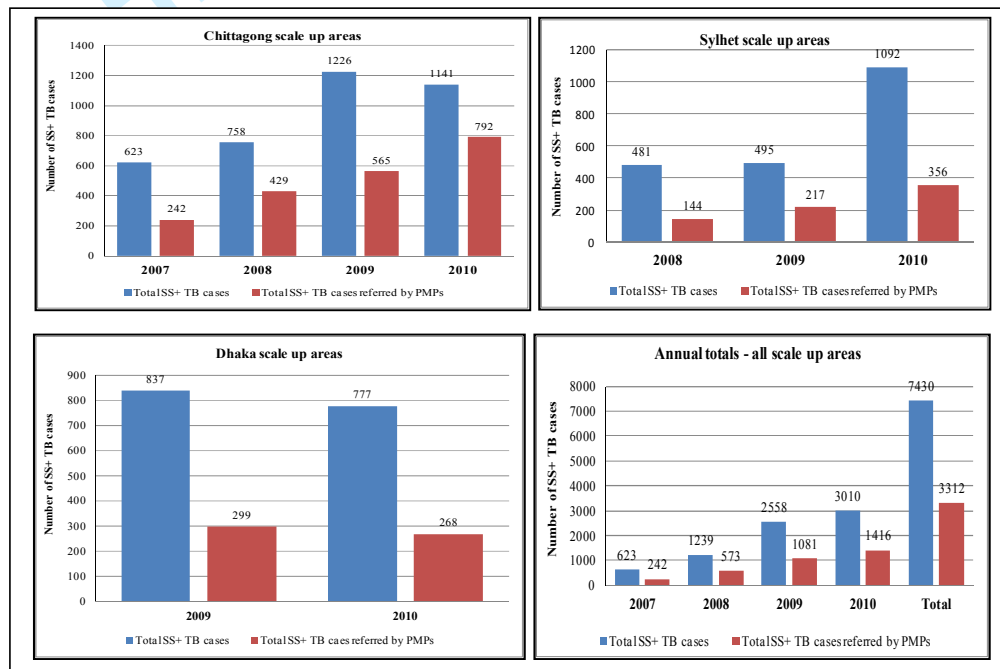

### Overall impact of the PPP on TB Control

The involvement of PMPs substantially increased case finding of SS+ TB cases, a key TB control indicator. The partnership made a significant contribution in identifying SS+ TB cases: from the inception of the PPP in 2004 until 2010, 703 participating PMPs referred almost 19,000 TB suspects and 3,959 SS+ TB cases to the designated DOTS centres (Figure 7). Overall, almost 36% of all SS+ TB cases were attributable to involvement of the private sector providers (Table 3).



Figure 7: Overall PMP contribution to identifying TB suspects in all PPP areas, 2004-2010 (including scale up)

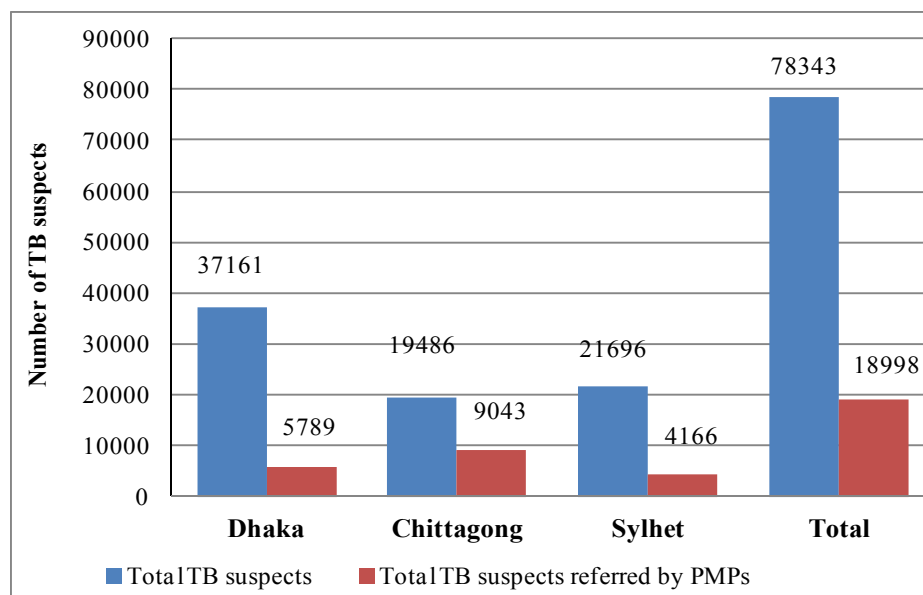

Table 3: Total SS+TB patients in all PPP areas and PMP's contribution, 2004-2010

|                                     | Dhaka | Chittagong | Sylhet | Total        |
|-------------------------------------|-------|------------|--------|--------------|
| Total SS+ TB cases in the PPP areas | 5199  | 3748       | 2068   | <b>11015</b> |
| Total SS+ TB cases referred by PMPs | 1214  | 2028       | 717    | <b>3959</b>  |
| PMPs' contribution %                | 23    | 54         | 35     | <b>36</b>    |

### Qualitative findings

The qualitative evaluation revealed that the participatory approach of planning and designing the PPP including involvement of all stakeholders in the process of selecting service components, selecting partners, and monitoring of the PPP played a crucial part in securing commitment and ownership from all parties involved. Virtually all PMPs interviewed (96%) mentioned having a positive experience in regard to the monitoring and support mechanism of the project, which was key to the success of the project implementation, and paved the way for scale-up. Specifically, they valued the monthly field visit by the project field staff. In reply to the question: "Do you own this project?" a popular PMP spontaneously replied "Oh, yes. No doubt about it". He went on to say "I have been consulted throughout the planning process of the project, and later we have jointly implemented it. So, this is our project. I am part of it".

The quarterly review meetings were organised in rotation by the NTP and the partner NGOs either in the NTP's conference room or in one of the NGO's working locations. When asked about these arrangements, both the NTP and NGOs expressed their satisfaction and expressed their commitment to maintaining this practice in future collaborations.

1 All PMPs interviewed (n=24) said they had no problems using the referral and other forms.  
2 *“The [TB related] registers and referral forms are quite simple and user-friendly, and easy*  
3 *to maintain”* said a busy practitioner. The NTP managers said they were amazed by the fact  
4 that most PMPs were keeping records. The PMPs also liked the system of referral back to the  
5 referring practitioners, which preserved their **professional** and commercial interests.  
6 However, a few PMPs were unhappy as they felt they did not get sufficient feedback about  
7 the patients they had referred, even though feedback was regularly given to PMPs through  
8 monthly field visits and during quarterly review meetings.

9  
10 The evaluation revealed major challenges in managing the PPP. It was difficult to bring such  
11 a heterogeneous group under one umbrella, especially in the early stages of the partnership  
12 process.

13  
14 Another important finding was that the public, NGO and private sector providers showed  
15 strong commitment and willingness to work together to achieve the common goal of TB  
16 control, although PMPs were initially sceptical about the motive of the public sector  
17 regarding this partnership, and the public sector and NGOs were initially doubtful whether  
18 PMPs would sacrifice their time to participate in such partnerships.

19  
20 In the absence of a regulatory mechanism, the PPP was primarily based on good relationships  
21 and dialogue. Both NTP and NGO respondents stated that they were sometimes  
22 overburdened with the extra work needed to implement the partnership activities. The NTP  
23 was hit harder than the partner NGOs, because there was a shortage of staff within the NTP  
24 management. Other key challenges encountered during implementation were to maintain the  
25 progress of the partnership, as it evolved, and to ensure joint ownership of decisions and  
26 collective responsibility for the direction and activities of the partnership. One senior PMP  
27 said *“Initially I thought this partnership would fail because I had serious reservations about*  
28 *negative attitudes of government officials. They [government officials] don’t know how to*  
29 *give respect to anybody other than their bosses. But after getting the chance to work with the*  
30 *NTP, I have now changed my mind. I have found the government officials now behave much*  
31 *better than they used to do in the past”*.

## 32 33 **Discussion and conclusion**

34  
35 The PPP model was highly effective in improving access to and quality of TB care in urban  
36 settings, as evidenced by a steady increase in case notification since implementation of the  
37 partnership, exceeding internationally agreed targets, and consistently maintaining much  
38 higher rates than the national average.

39  
40 Systematic implementation of the PPP led to greater and effective involvement of PMPs,  
41 resulting in increased access to quality TB care. However, needs-based training is necessary  
42 for PMPs to enhance their knowledge on the NTP guidelines in regard to appropriate  
43 diagnosis, treatment, and follow-up to guarantee the continuity and quality of TB care.

44  
45 The tools, protocols and ACSM materials proved vital to facilitating the partnership. The  
46 lessons learned from this partnership formed the basis of the National PPM (Public-Private  
47 Mix) guidelines. The revised tools and guidelines considerably improved the quality of TB  
48 reporting, thus strengthening the health information available. The revised protocol for  
49 referrals gave PMPs confidence that they would not lose their patients, which greatly  
50 increased their motivation to remain in the partnership.

51  
52  
53  
54  
55  
56  
57  
58  
59  
60  
Zafar Ullah

1  
2  
3  
4 1  
5 2 The key challenges encountered during implementation were to maintain the momentum as  
6 3 the partnership evolved, and to ensure joint ownership of decisions and collective  
7 4 responsibility for the direction and activities of the partnership. The NTP's and other  
8 5 partners' commitment and nurturing of an atmosphere where all stakeholders could feel  
9 6 involved in the partnership were critical to overcoming these challenges.  
10 7

11 8 It was possible to bring the public, NGOs and private sector providers together to work  
12 9 towards achieving a common public health goal despite perceived barriers between public  
13 10 and private sector providers, initial scepticism about forming the partnership, and challenges  
14 11 during implementation of the PPP. The participatory development of the partnership and  
15 12 maintaining close linkages with the PMPs helped them to gain confidence and trust over the  
16 13 public sector services, which in turn facilitated the development of a close relationship with  
17 14 the NTP and NGO partners. However, in order to develop and sustain such a partnership,  
18 15 roles and responsibilities of participating agencies and individuals must be defined. These  
19 16 findings are consistent with the outcomes of other much smaller operational research projects  
20 17 implemented elsewhere.<sup>15,20-25</sup>  
21 18

22 19 The selected study sites were drawn from urban DOTS areas in Bangladesh and the research  
23 20 was deliberately embedded within the NTP programme activities. The PPP service  
24 21 components were aligned with the NTP guidelines and were implemented through the  
25 22 NTP/NGO's designated DOTS centres. The health system elements, particularly the type of  
26 23 health facilities, composition of health staff, and organisation of the TB control activities  
27 24 through government-NGO collaboration were similar in the study areas and in other urban  
28 25 areas of Bangladesh. Moreover, the type and characteristics of urban health care provided by  
29 26 private sector providers follow a similar pattern in all urban areas of the country. Therefore,  
30 27 the PPP can be scaled up in other urban DOTS areas providing that human and financial  
31 28 resources are provided for the partnership activities.  
32 29

33 30 In summary, this study demonstrated that TB control outcomes could be achieved by  
34 31 combining the diverse strengths and advantages of the public and private sectors, NGOs and  
35 32 a group of selected PMPs. High rates of case detection were attained without involving all  
36 33 private practitioners in the area, thus making the PPP technically attractive to national  
37 34 programmes in other countries in terms of feasibility of implementation and wider scale up.  
38 35

39 36 **Acknowledgements:** We thank the patients, PMPs, and NGOs involved in this study, and the  
40 37 Bangladesh NTP for permission to carry out the study. We also thank an anonymous  
41 38 professional colleague who reviewed the revised manuscript.  
42 39

43 40 **Funding:** This document is an output from a project funded by UK Aid from the UK  
44 41 Department for International Development (DFID) for the benefit of developing countries.  
45 42 However, the views expressed and information contained in it are not necessarily those of or  
46 43 endorsed by DFID, which can accept no responsibility for such views or information or for  
47 44 any reliance placed on them.  
48 45

49 46 **Conflicts of interest:** none declared.  
50 47

51 48 **Authors contributions:** ZU conceived and designed the study, led the data collection and  
52 49 analysis, and preparation of the manuscript; RH participated in the data analysis and in the  
53 50 preparation of the manuscript; AH participated in data collection and analysis; SA  
54 51

55 52  
56 53  
57 54  
58 55  
59 56  
60 57  
Zafar Ullah

1 coordinated the study implementation and data collection; AI participated in data collection;  
 2 JNN participated in the design of the study, advised on data collection and analysis and  
 3 participated in the preparation of the manuscript.

## References

1. World Health Organisation. *Global Tuberculosis Control: World Health Organisation Report 2011*; Geneva: World Health Organisation.
2. World Health Organisation. *Tuberculosis Factsheet 2002*; Factsheet Number 104, Revised August 2002; Geneva: World Health Organisation.
3. Grange JM, Zumla A. The global emergency of tuberculosis: What is the cause? *J R Soc Health*, 2002; **122**: 78–81.
4. Benatar S, Brock G. *Global Health and Global Health Ethics*; Cambridge, United Kingdom: Cambridge University Press, 2011
5. Guda DR, Khandaker IU, Parveen SD, and Whitson T. *Bangladesh: NGO and Public Sector Tuberculosis Service Delivery—Rapid Assessment Results*; Published for the United States Agency for International Development by the Quality Assurance Project; December 2004.
6. World Health Organisation. *Tuberculosis and Health Sector Reforms in Bangladesh – A Concept Paper*, 2004. New Delhi: World Health Organisation, Regional Office for South-East Asia.
7. The National Tuberculosis Control Programme (NTP). *Annual report 2007* Dhaka: Government of Bangladesh.
8. Barkat A, Maksud AKM. *Private Sector Health Services in Bangladesh: An Exploratory Study*, prepared for Engender Health, Dhaka, 2003.
9. UNICEF. *Public-private partnership in the social sector- part two: country experiences, 1999*: 219–291; Dhaka: UNICEF Bangladesh.
10. Zafar Ullah AN, Lubben M, Newell JN. A model for effective involvement of private medical practitioners in TB care. *International Journal of Health Planning and Management*, 2004, **19 (3)**: 227–245.
11. World Bank. *Comparative Advantages of Public and Private Health Care Providers in Bangladesh; Bangladesh Development Series Paper No. 4, 2005*; South Asia Human Development Unit, Dhaka: The World Bank Office.
12. Zafar Ullah AN, Huque R, Begum V, Newell JN, Gerein N. Public-private partnership for TB control in Bangladesh: role of private medical practitioners in the management of TB patients. *World Medical & Health Policy*, 2010; **2 (1)**, Article 13.
13. Uplekar MW, Juvekar SK, Monarkar S, Rangan S, Nunn P. Tuberculosis patients and practitioners in private clinics in India, *Int J Tuberc Lung Dis*, 1998; **2**: 324–9.
14. World Health Organisation. *Involving private medical practitioners in TB and STI control, 2001*. New Delhi: World Health Organisation.
15. Newell JN, Pande SB, Baral SC, Bam DS, Malla P. Control of Tuberculosis in an urban setting in Nepal: public-private partnership. *Bull World Health Organ*, 2004; **82**: 92–98.
16. Walley J, Graham K, Wei X, Kain K, Weston R. Getting research into practice: primary care management of noncommunicable diseases in low-and middle income countries, *Bull World Health Organ*, 2012; 90:402.
17. Zachariah R, Harries AD, Ishikawa N, Rieder HL, Bissell K, Laserson K, Massaquoi M, Van Herp M, Reid T. Operational research in low-income countries: what, why, and how? *Lancet Infectious Disease*, 2009; **9**, 711–717.

18. Johnson RB, Onwuegbuzie AJ. Mixed methods research: A research paradigm whose time has come. *Educational Researcher*, 2004; **33**, 14–26.
19. Patton MQ. *Qualitative Research & Evaluation Methods*; 3<sup>rd</sup> Eds. London: Sage Publications, 2002.
20. Newell JN, Pande SB, Baral SC, Bam DS, Malla P. Leadership, management and technical lessons learnt from a successful public-private partnership for TB control in Nepal, *Int J Tuberc Lung Dis*, 2005; **9**(9):1013–1017.
21. Porter JD, Ogden JA, Rao PV, Rao VP, Rajesh D, Buskade RA, Soutar D. Introducing operations research into management and policy practices of a non-governmental organization (NGO): a partnership between an Indian leprosy NGO and an international academic institution. *Health Policy Plan*; 2004; **19**(2): 80–87.
22. Rangan S. The Public-Private Mix in India's Revised National Tuberculosis Control Programme: An Update, *J Indian Med Assoc*. 2003;**101**(3): 161–163.
23. Rangan S, Rasalpurkar SB, Morankar SN, Joshi AN, Porter JDH. Tuberculosis control in rural India: lessons from public- private collaboration, *Int J Tuberc Lung Dis*, 2004; **8**: 552.
24. Dewan P, Lal SS, Lonroth K, Wares F, Uplekar M, Sahu S, Granich R, Chauhan LS. Improving Tuberculosis Control through Public-Private Collaboration in India: Literature Review; *BMJ* 2006; **332**: 574–578.
25. Dreesch N, Nyoni J, Mokopakgosi O, Seipone K, Kalilani JA, Kaluwa O, Musowe V. Public-private options for expanding access to human resources for HIV/AIDS in Botswana; *Human Resources for Health*, 2007;**5**: 25.

**Title**

Involving the Private Medical Sector in TB Control in Bangladesh: a mixed method study

**Article Focus**

- To assess the effectiveness of a Public-Private Partnership (PPP) model to involve private medical sector in TB control
- To ascertain whether scaling up of the PPP model approach to engage PMPs is feasible and has an effect on case notification rate.

**Key messages**

- This study demonstrated the feasibility and effectiveness of providing TB care through involving private sector health care providers
- The PPP substantially improved access to and quality of TB care in urban settings, as evidenced by increased TB case notification rate and increased treatment success rate.
- Our results show that it is feasible to scale up a public-private partnership within the national TB control programme.

**Strengths and Limitations**

- As TB continues to be a major threat to public health in low- and middle-income countries, and is re-emerging as an issue for concern in high-income countries, the findings of this study provide evidence for national and international scale-up of such partnerships
- By using both quantitative and qualitative methods, this study has permitted more in-depth analysis of the effectiveness of this PPP model
- From the beginning, the study was guided by a vision of nation-wide scale up.

Figure 1: Case notification rates of new SS+ TB cases in Dhaka Metropolitan City\* and the PPP project areas

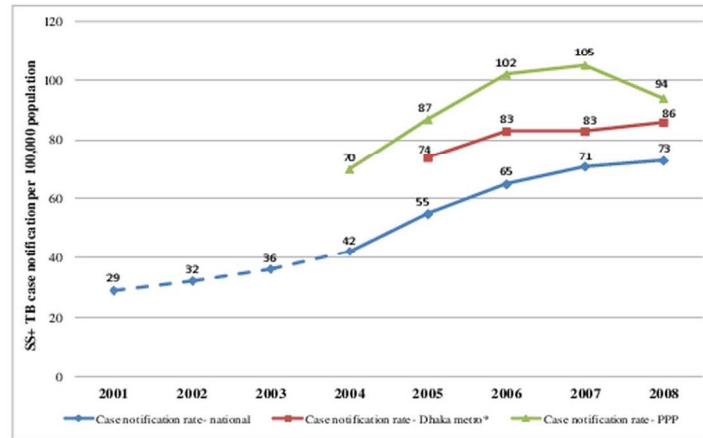

129x90mm (300 x 300 DPI)

Figure 2: Area-wise case notification of SS+ TB in the PPP project areas: 2004 – 2008

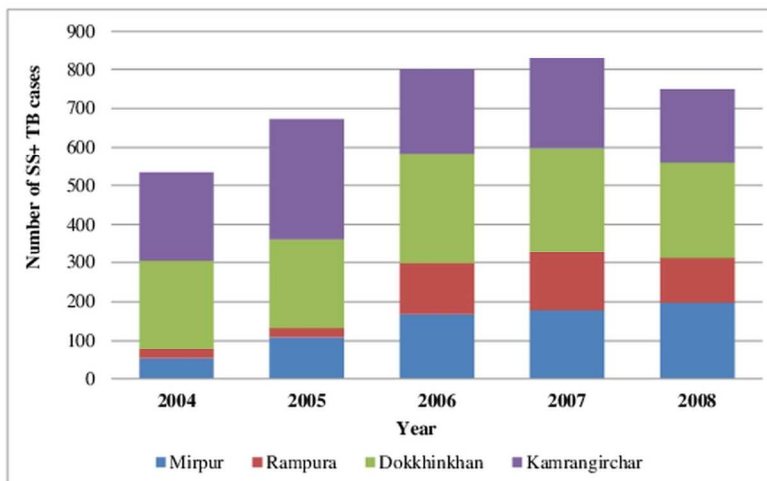

116x90mm (300 x 300 DPI)

ew only



1  
2  
3  
4  
5  
6  
7  
8  
9  
10  
11  
12  
13  
14  
15  
16  
17  
18  
19  
20  
21  
22  
23  
24  
25  
26  
27  
28  
29  
30  
31  
32  
33  
34  
35  
36  
37  
38  
39  
40  
41  
42  
43  
44  
45  
46  
47  
48  
49  
50  
51  
52  
53  
54  
55  
56  
57  
58  
59  
60

Figure 3: Numbers of extra-pulmonary TB cases registered in the PPP DOTS Centres

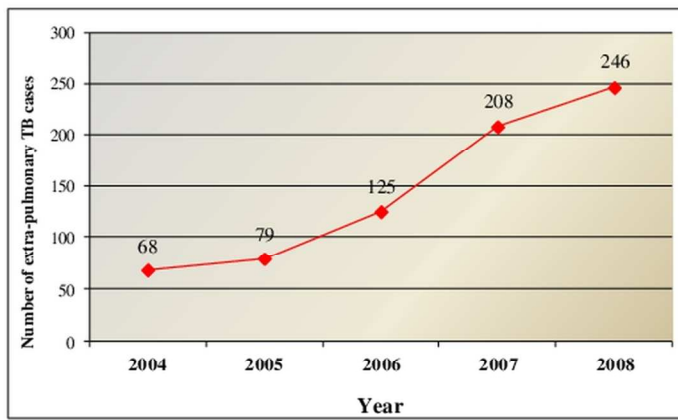

122x90mm (300 x 300 DPI)

ew only

Figure 4: Distribution of new SS+ TB cases per age group and gender in the PPP project areas

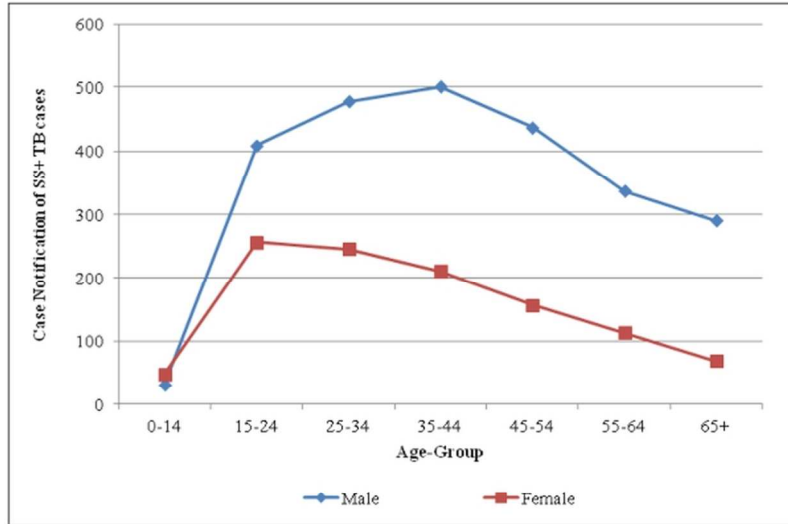

106x90mm (300 x 300 DPI)

For peer review only

1  
2  
3  
4  
5  
6  
7  
8  
9  
10  
11  
12  
13  
14  
15  
16  
17  
18  
19  
20  
21  
22  
23  
24  
25  
26  
27  
28  
29  
30  
31  
32  
33  
34  
35  
36  
37  
38  
39  
40  
41  
42  
43  
44  
45  
46  
47  
48  
49  
50  
51  
52  
53  
54  
55  
56  
57  
58  
59  
60

Figure 5: Numbers of TB suspects receiving sputum microscopy in the PPP project areas

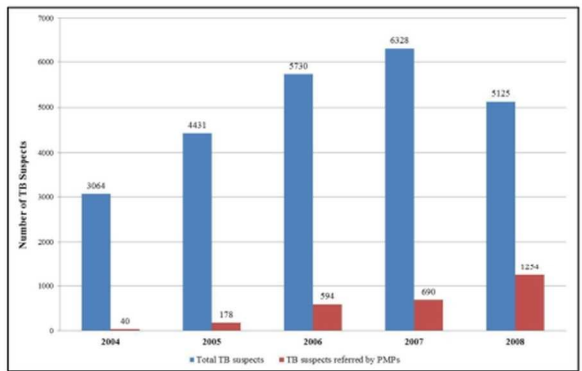

123x90mm (300 x 300 DPI)

Review only

Figure 6: SS+TB patients registered in PPP scale up areas and PMP's contribution, 2007-2010

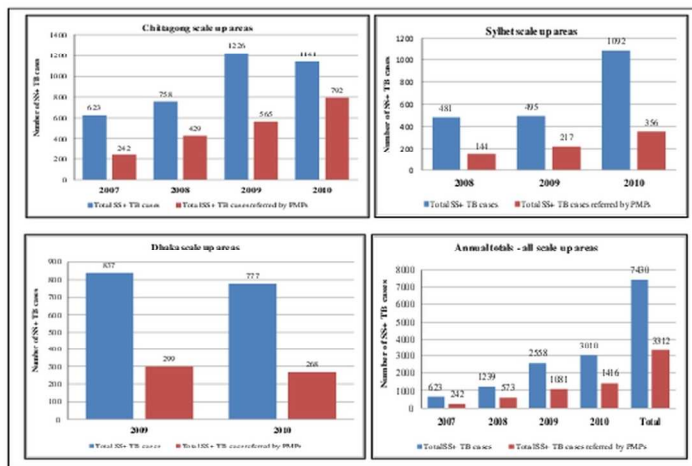

114x90mm (300 x 300 DPI)

ew only

1  
2  
3  
4  
5  
6  
7  
8  
9  
10  
11  
12  
13  
14  
15  
16  
17  
18  
19  
20  
21  
22  
23  
24  
25  
26  
27  
28  
29  
30  
31  
32  
33  
34  
35  
36  
37  
38  
39  
40  
41  
42  
43  
44  
45  
46  
47  
48  
49  
50  
51  
52  
53  
54  
55  
56  
57  
58  
59  
60

Figure 7: Overall PMP contribution to identifying TB suspects in all PPP areas, 2004-2010 (including scale up)

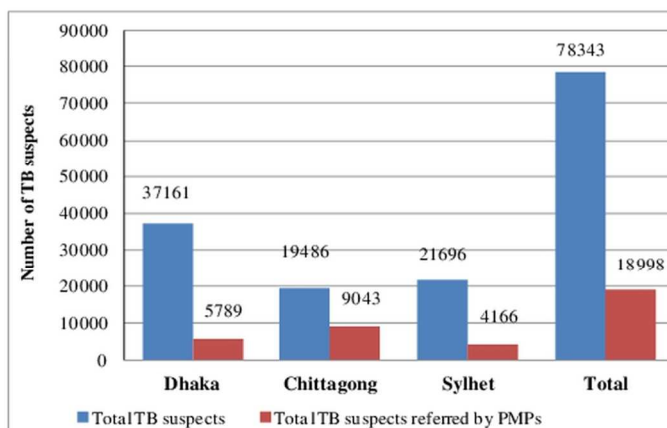

122x90mm (300 x 300 DPI)

Review only
